# Supplementary material
Source: Research Square preprint supplement (doi:10.21203/rs.3.rs-9080697/v1)
Supplement: Supplementary file 1 [file 2d2f4161d866d09d3041509f.docx]

Supporting Information

**Ultra-High Discharge Voltage Plateau of 3.2 V Achieved in Li-CO2 Batteries Using Iron Polyphthalocyanine**

Ning Zhao+, Yi Zhang+, Li-Min Liu, Han-Qi Zhang, Xiao-Sha Wu, Xuan Lu, Han Yun, Yang Gao, Wen-Long Su, Yi-Ming Fan, Rong-Fen Feng, Zheng Meng*, Shu-Jiang Ding, Wen-Feng Liu, Qiang Wang, Xiao-Fei Hu*


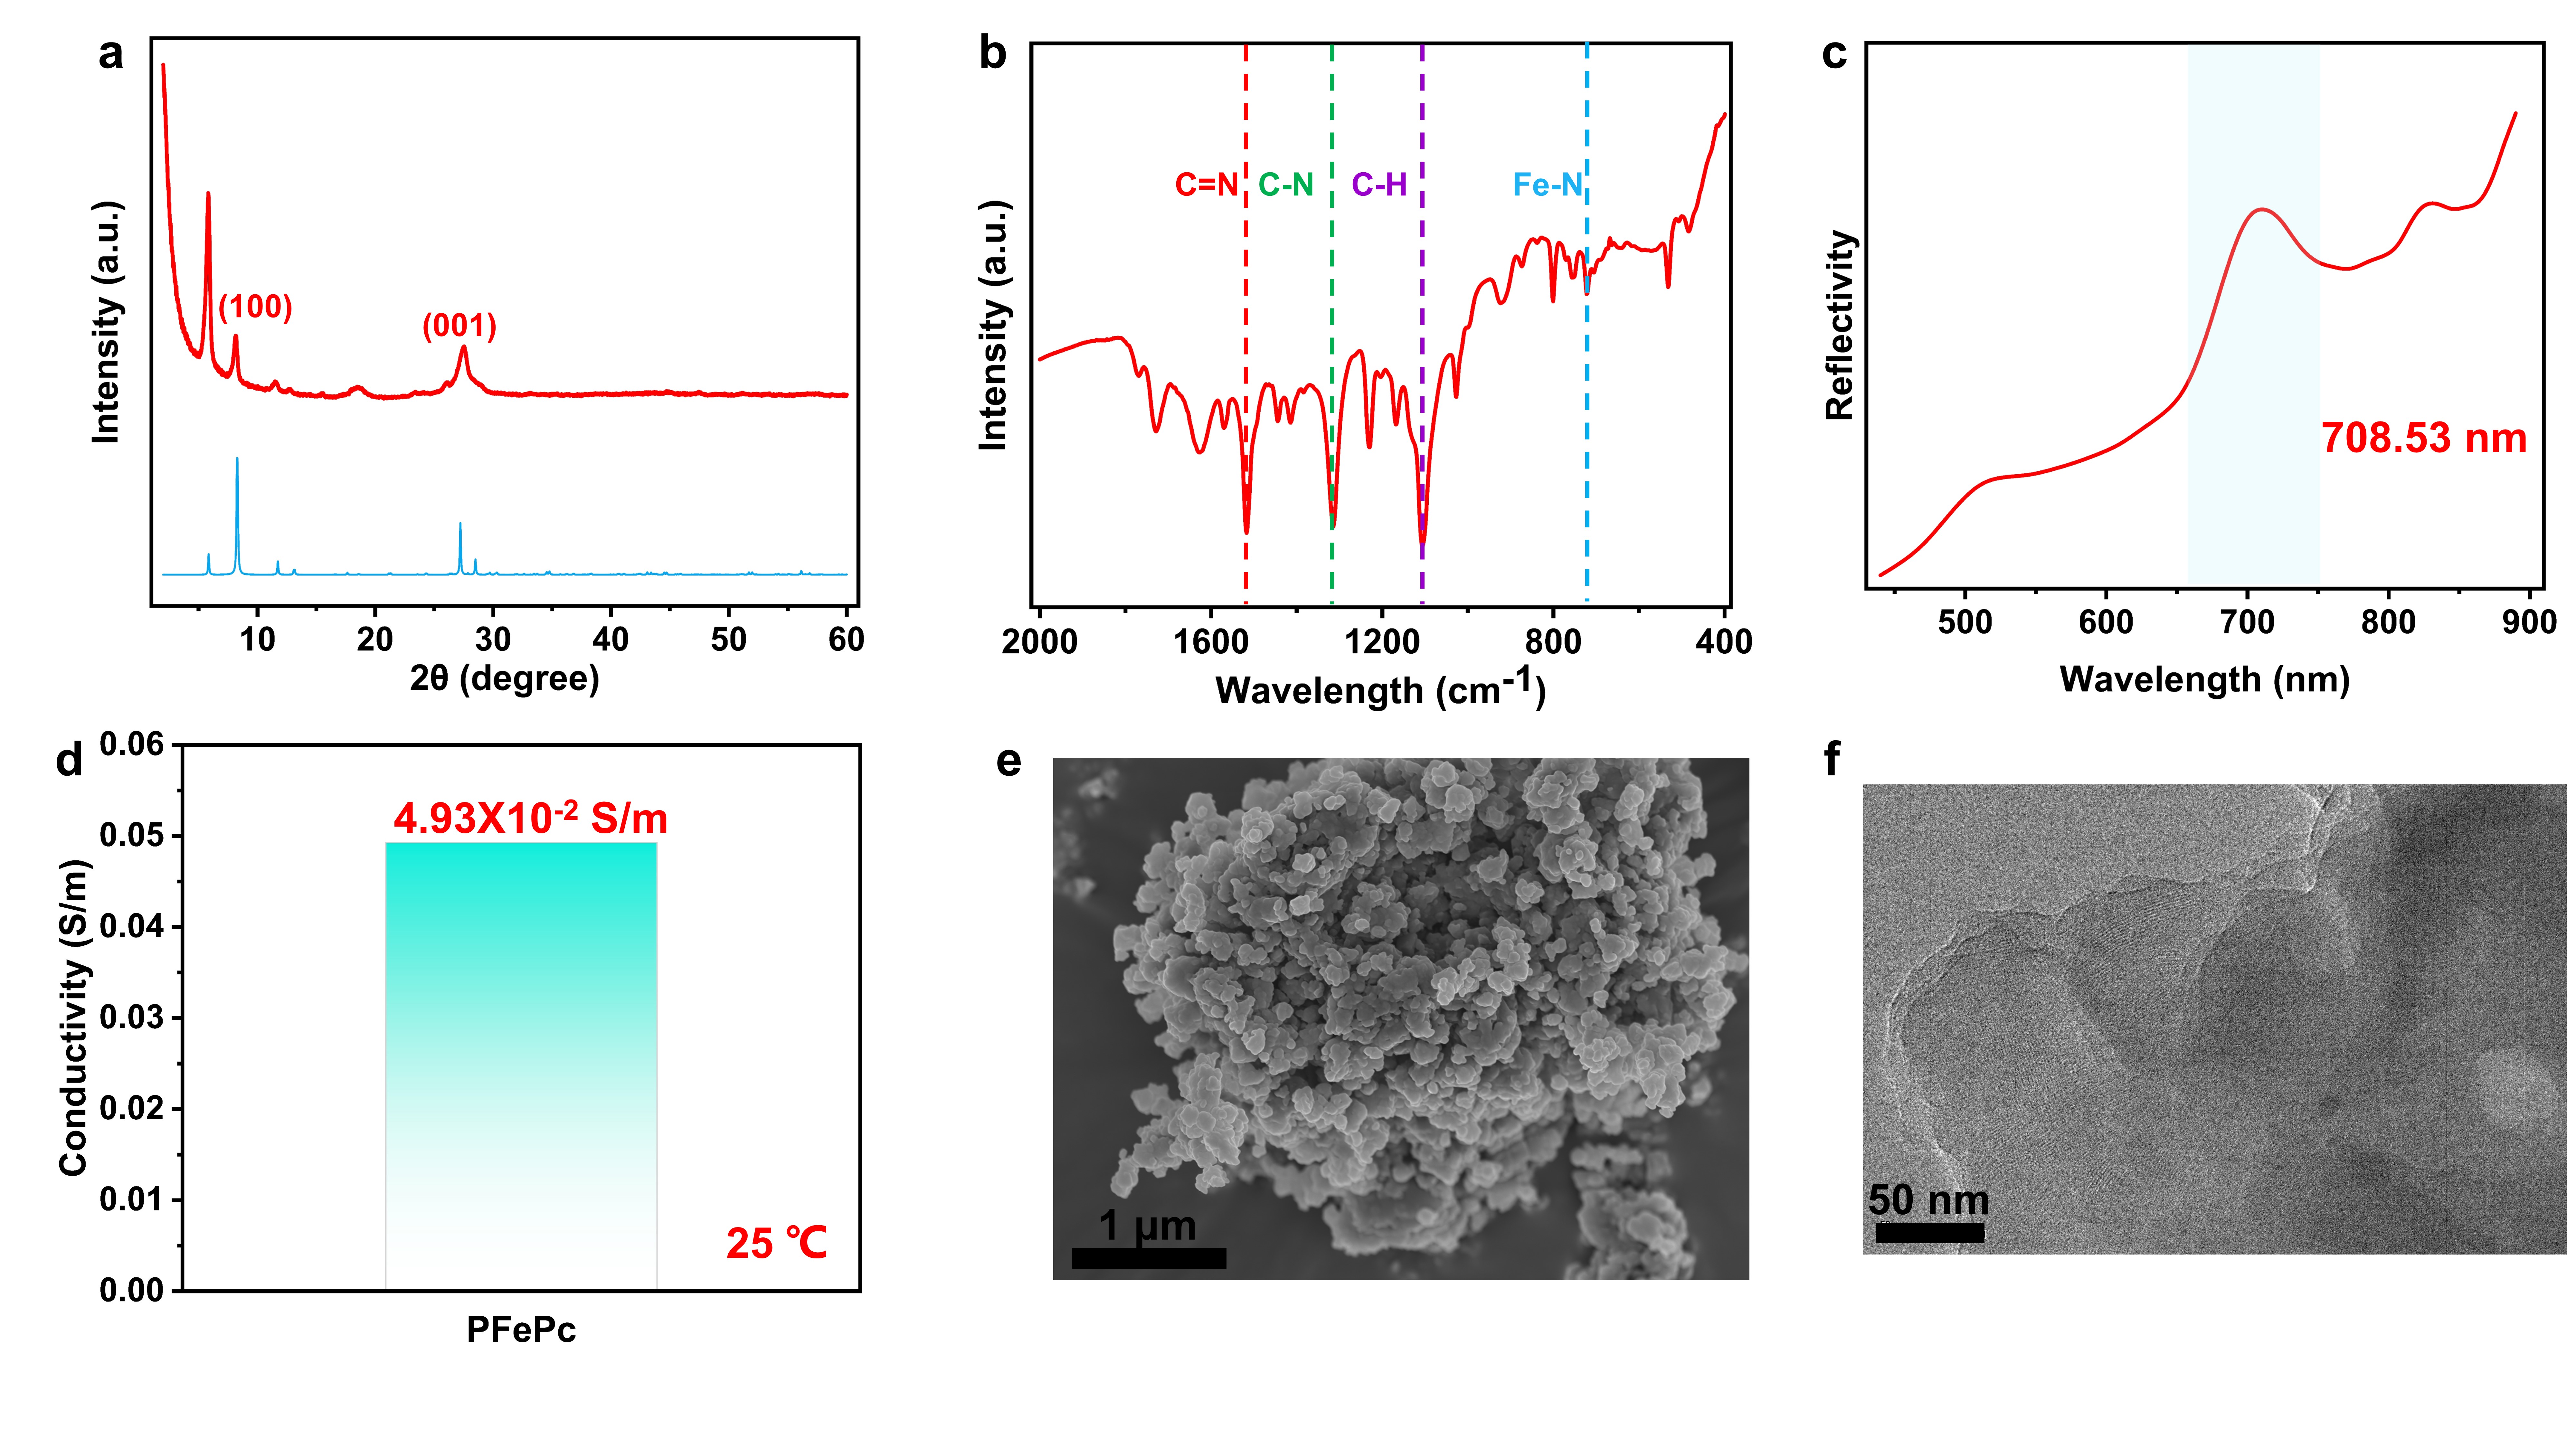
Figure S1. a) XRD pattern b) FT-IR spectrum c) UV–vis spectrum d) Conductivity e) SEM and f) TEM of solid-state redox mediator pFeIIPc.


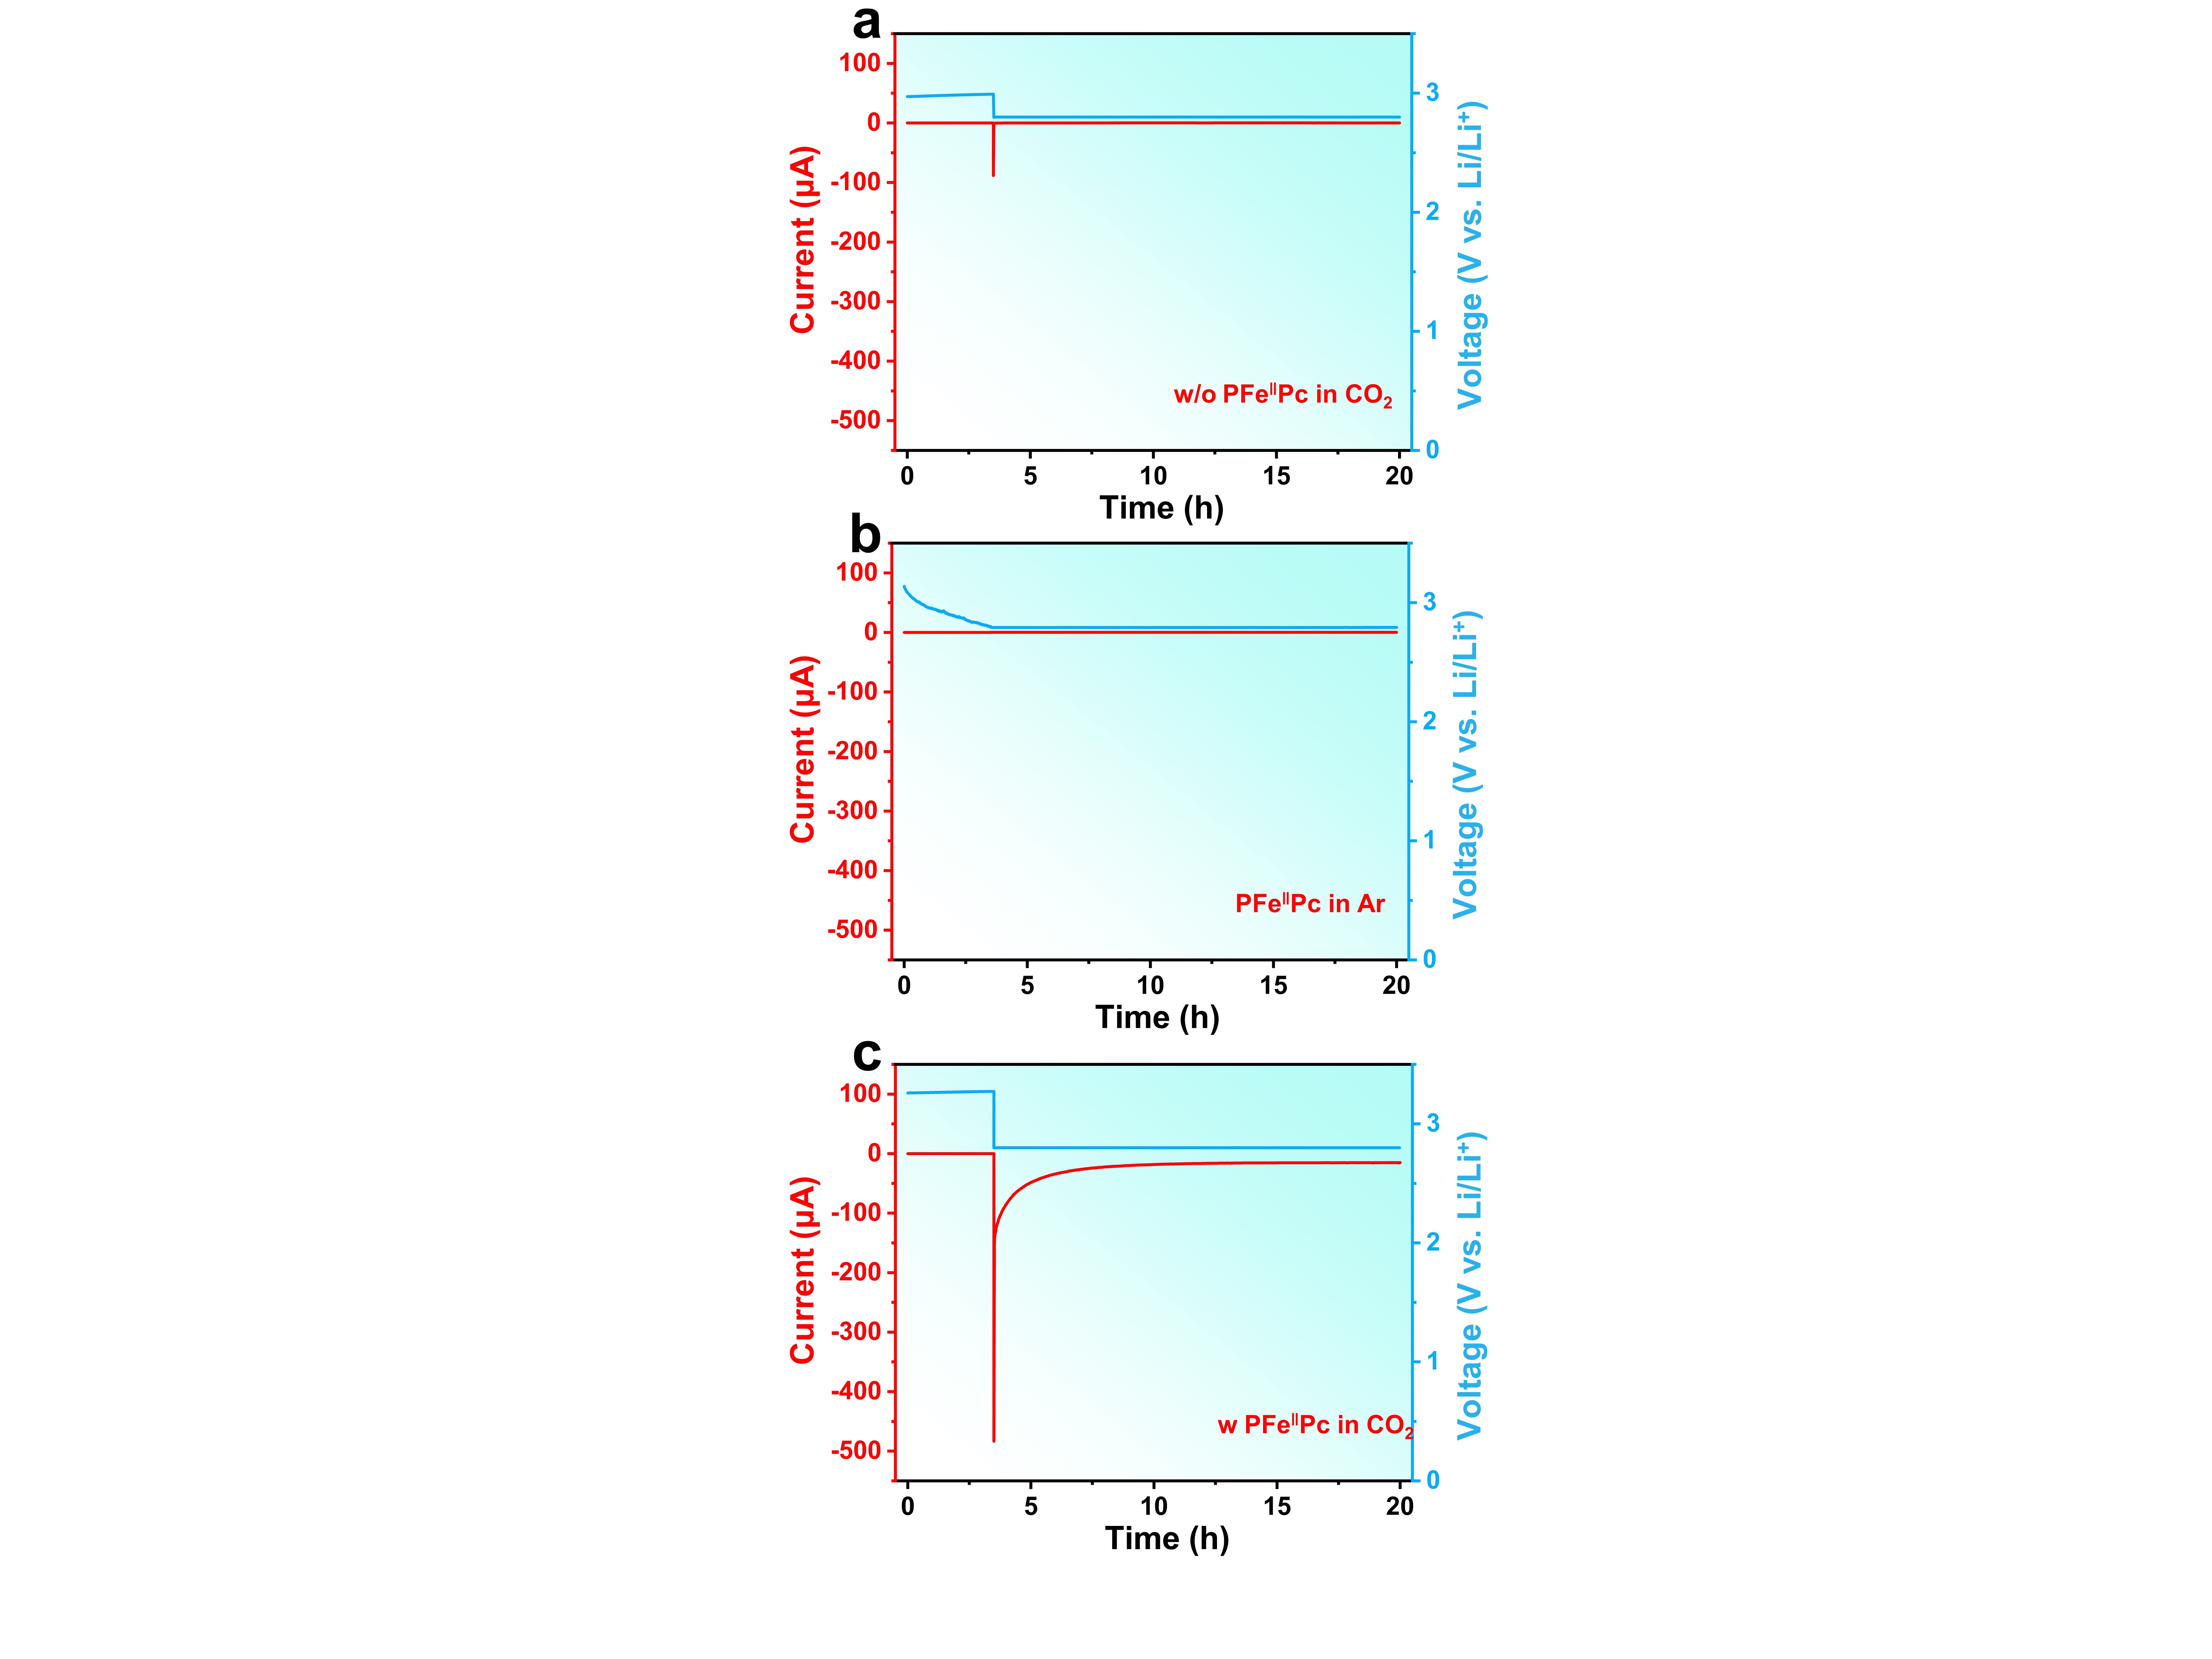


**Figure S2.** Current-Time curve under constant voltage of a) CNTs and pFe‖Pc cathode in b) Ar and c) CO2 atmosphere.


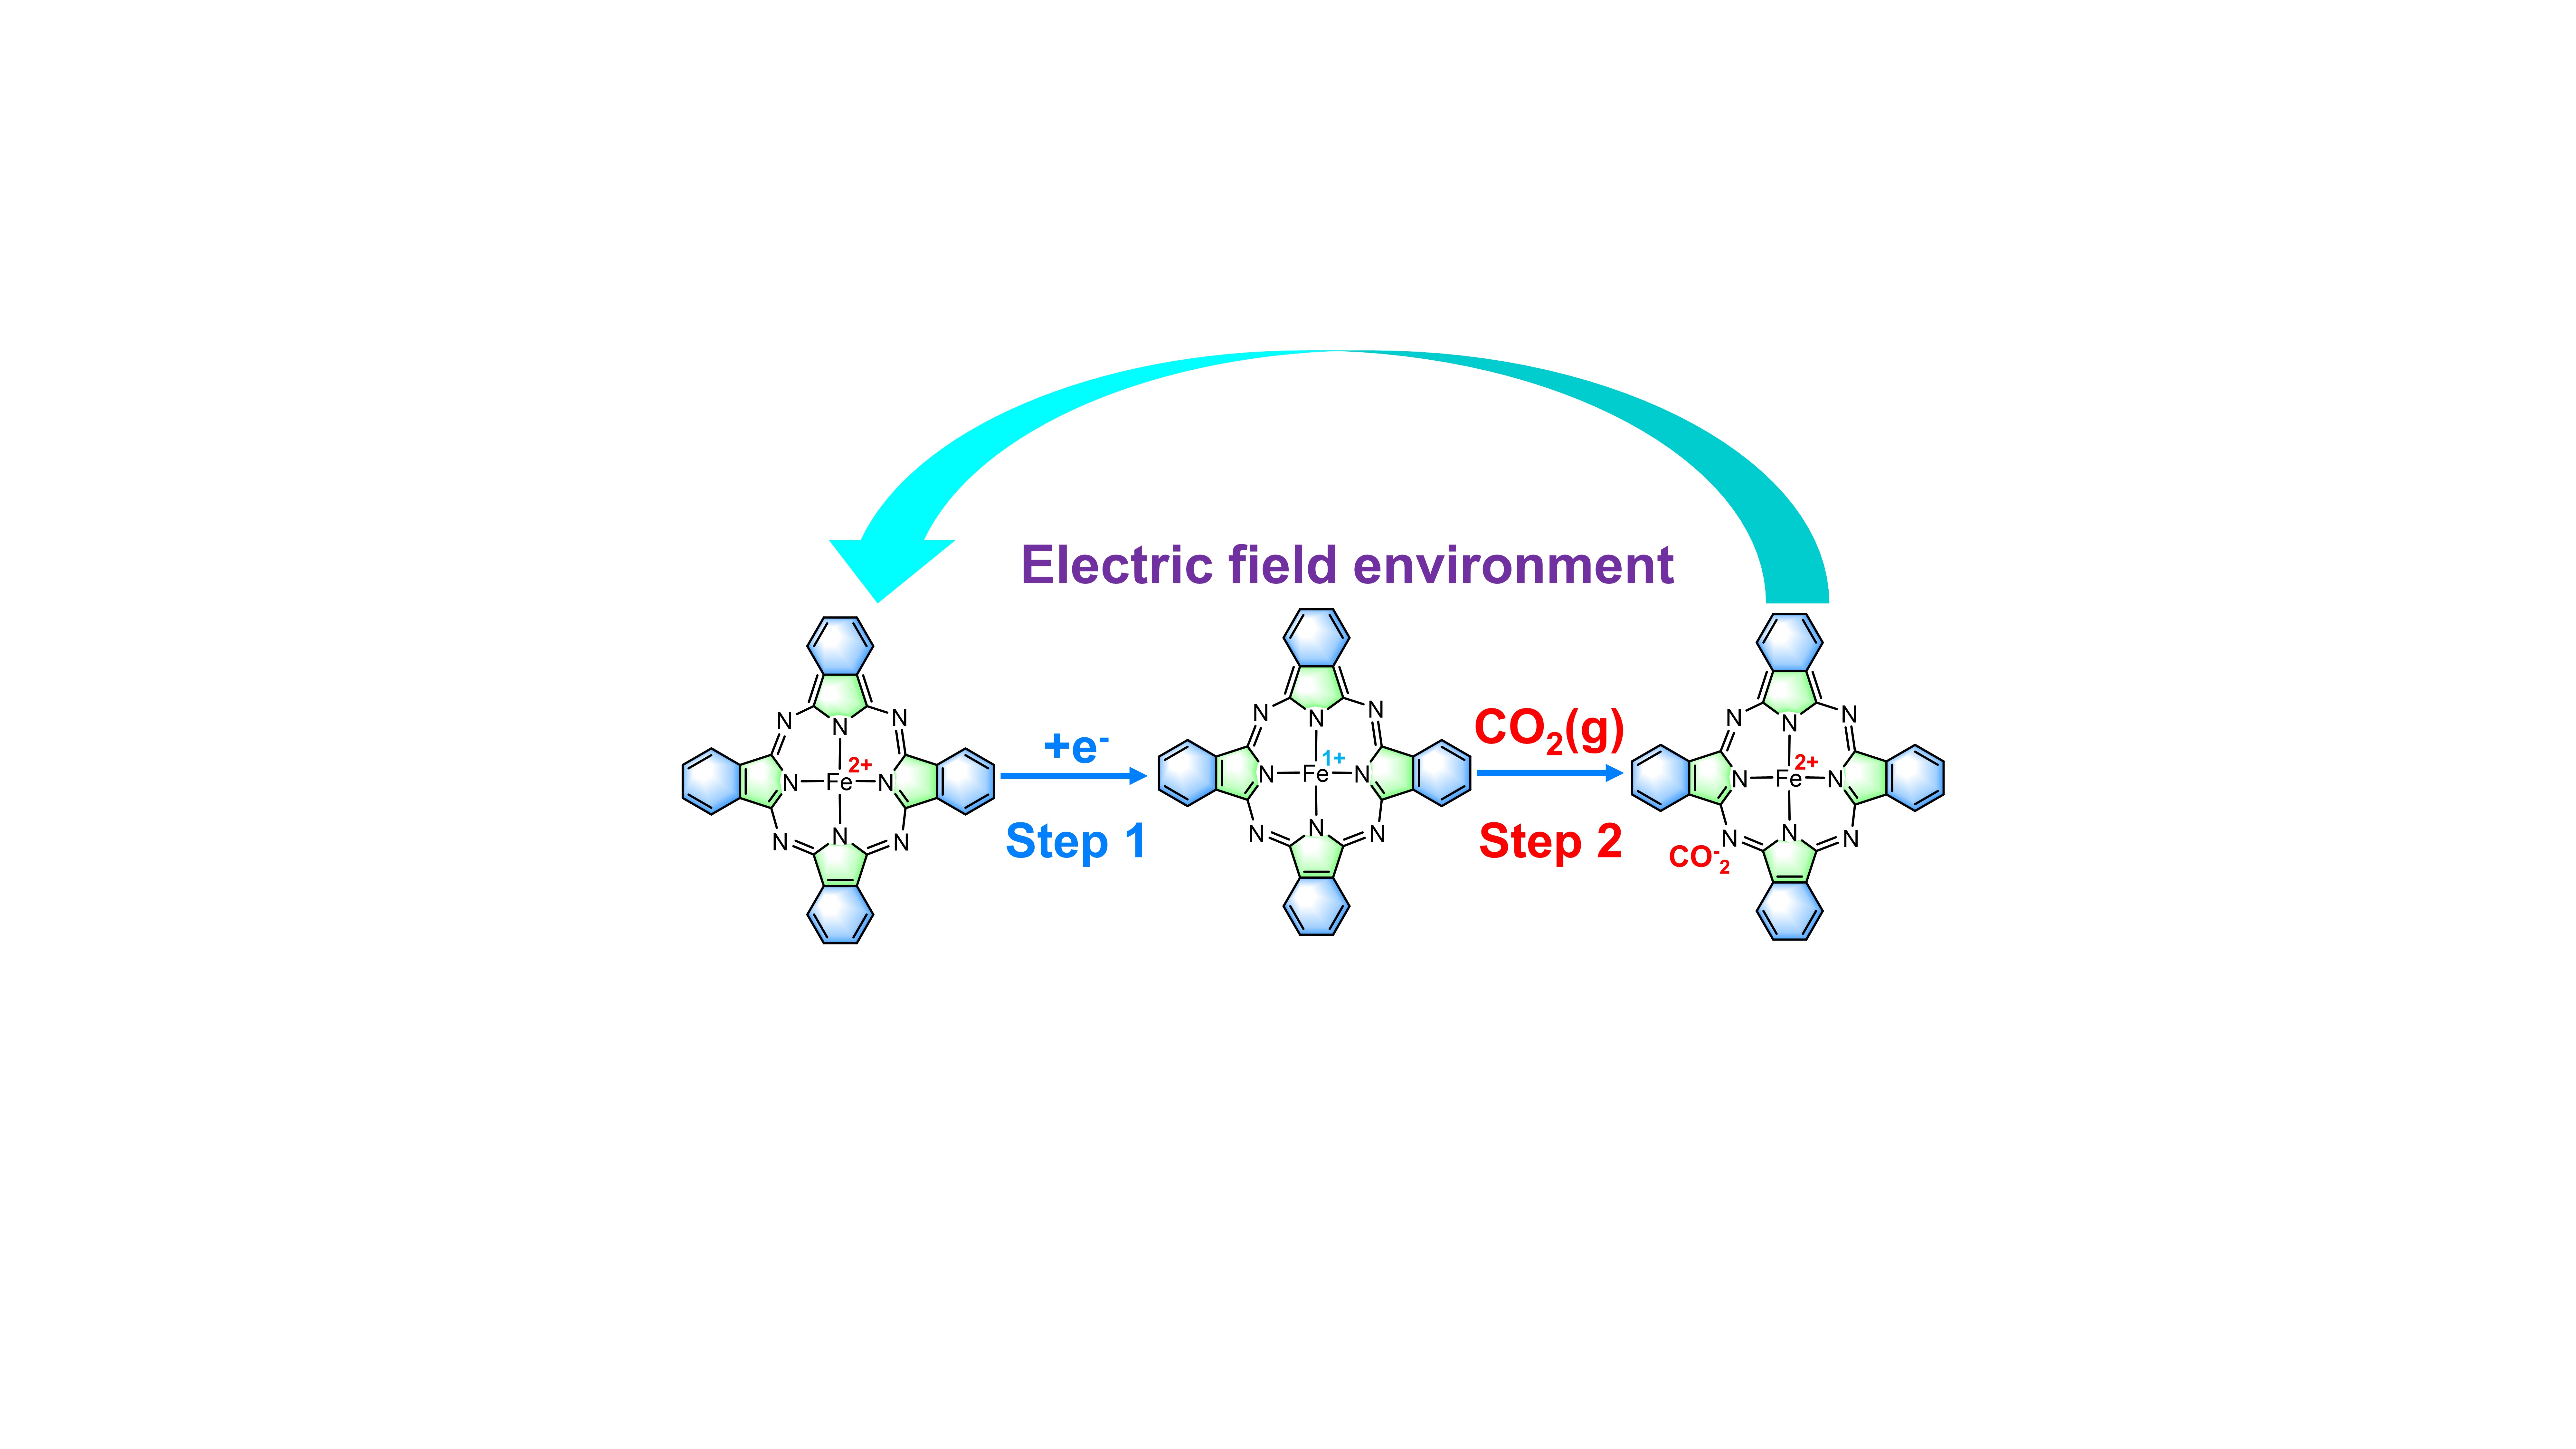


Figure S3. Schematic diagram of CO2 Reduction by pFeIIPc via priority electron transfer.


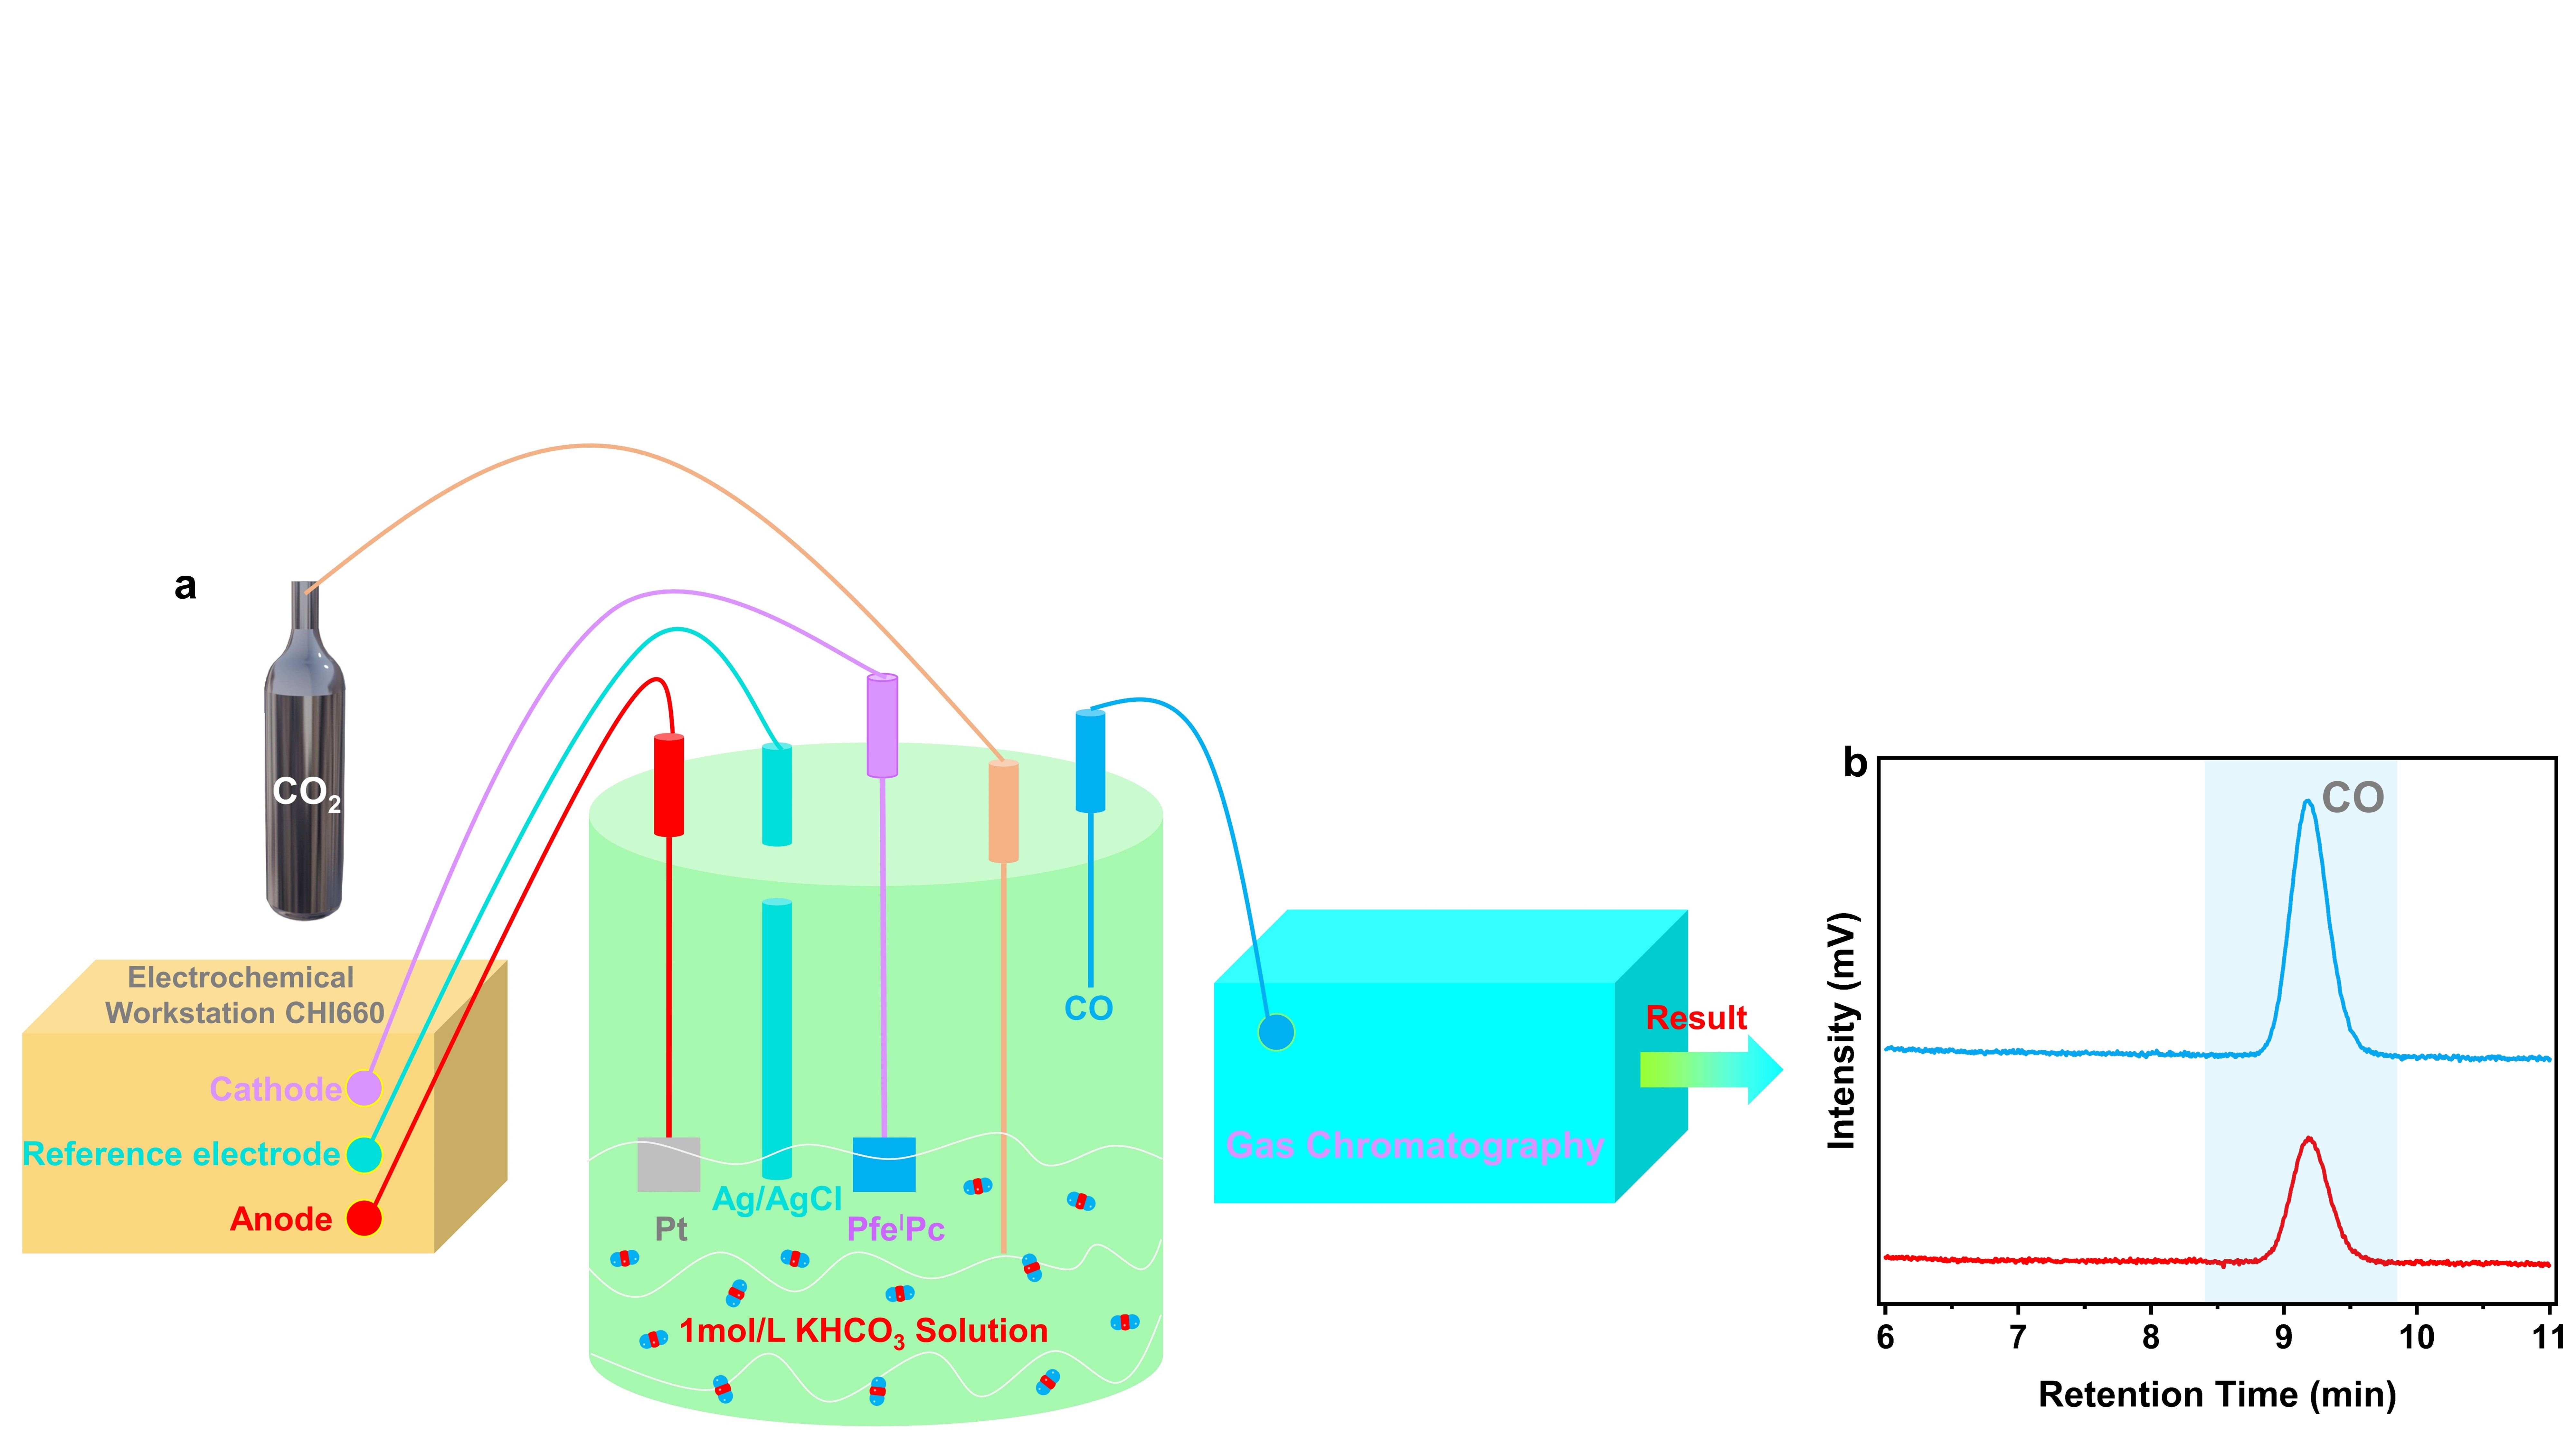


Figure S4. a) Schematic diagram of in-situ online GC-MS. b) GC-MS spectrum based on pFeIPc cathode during discharging in CO2 atmosphere.


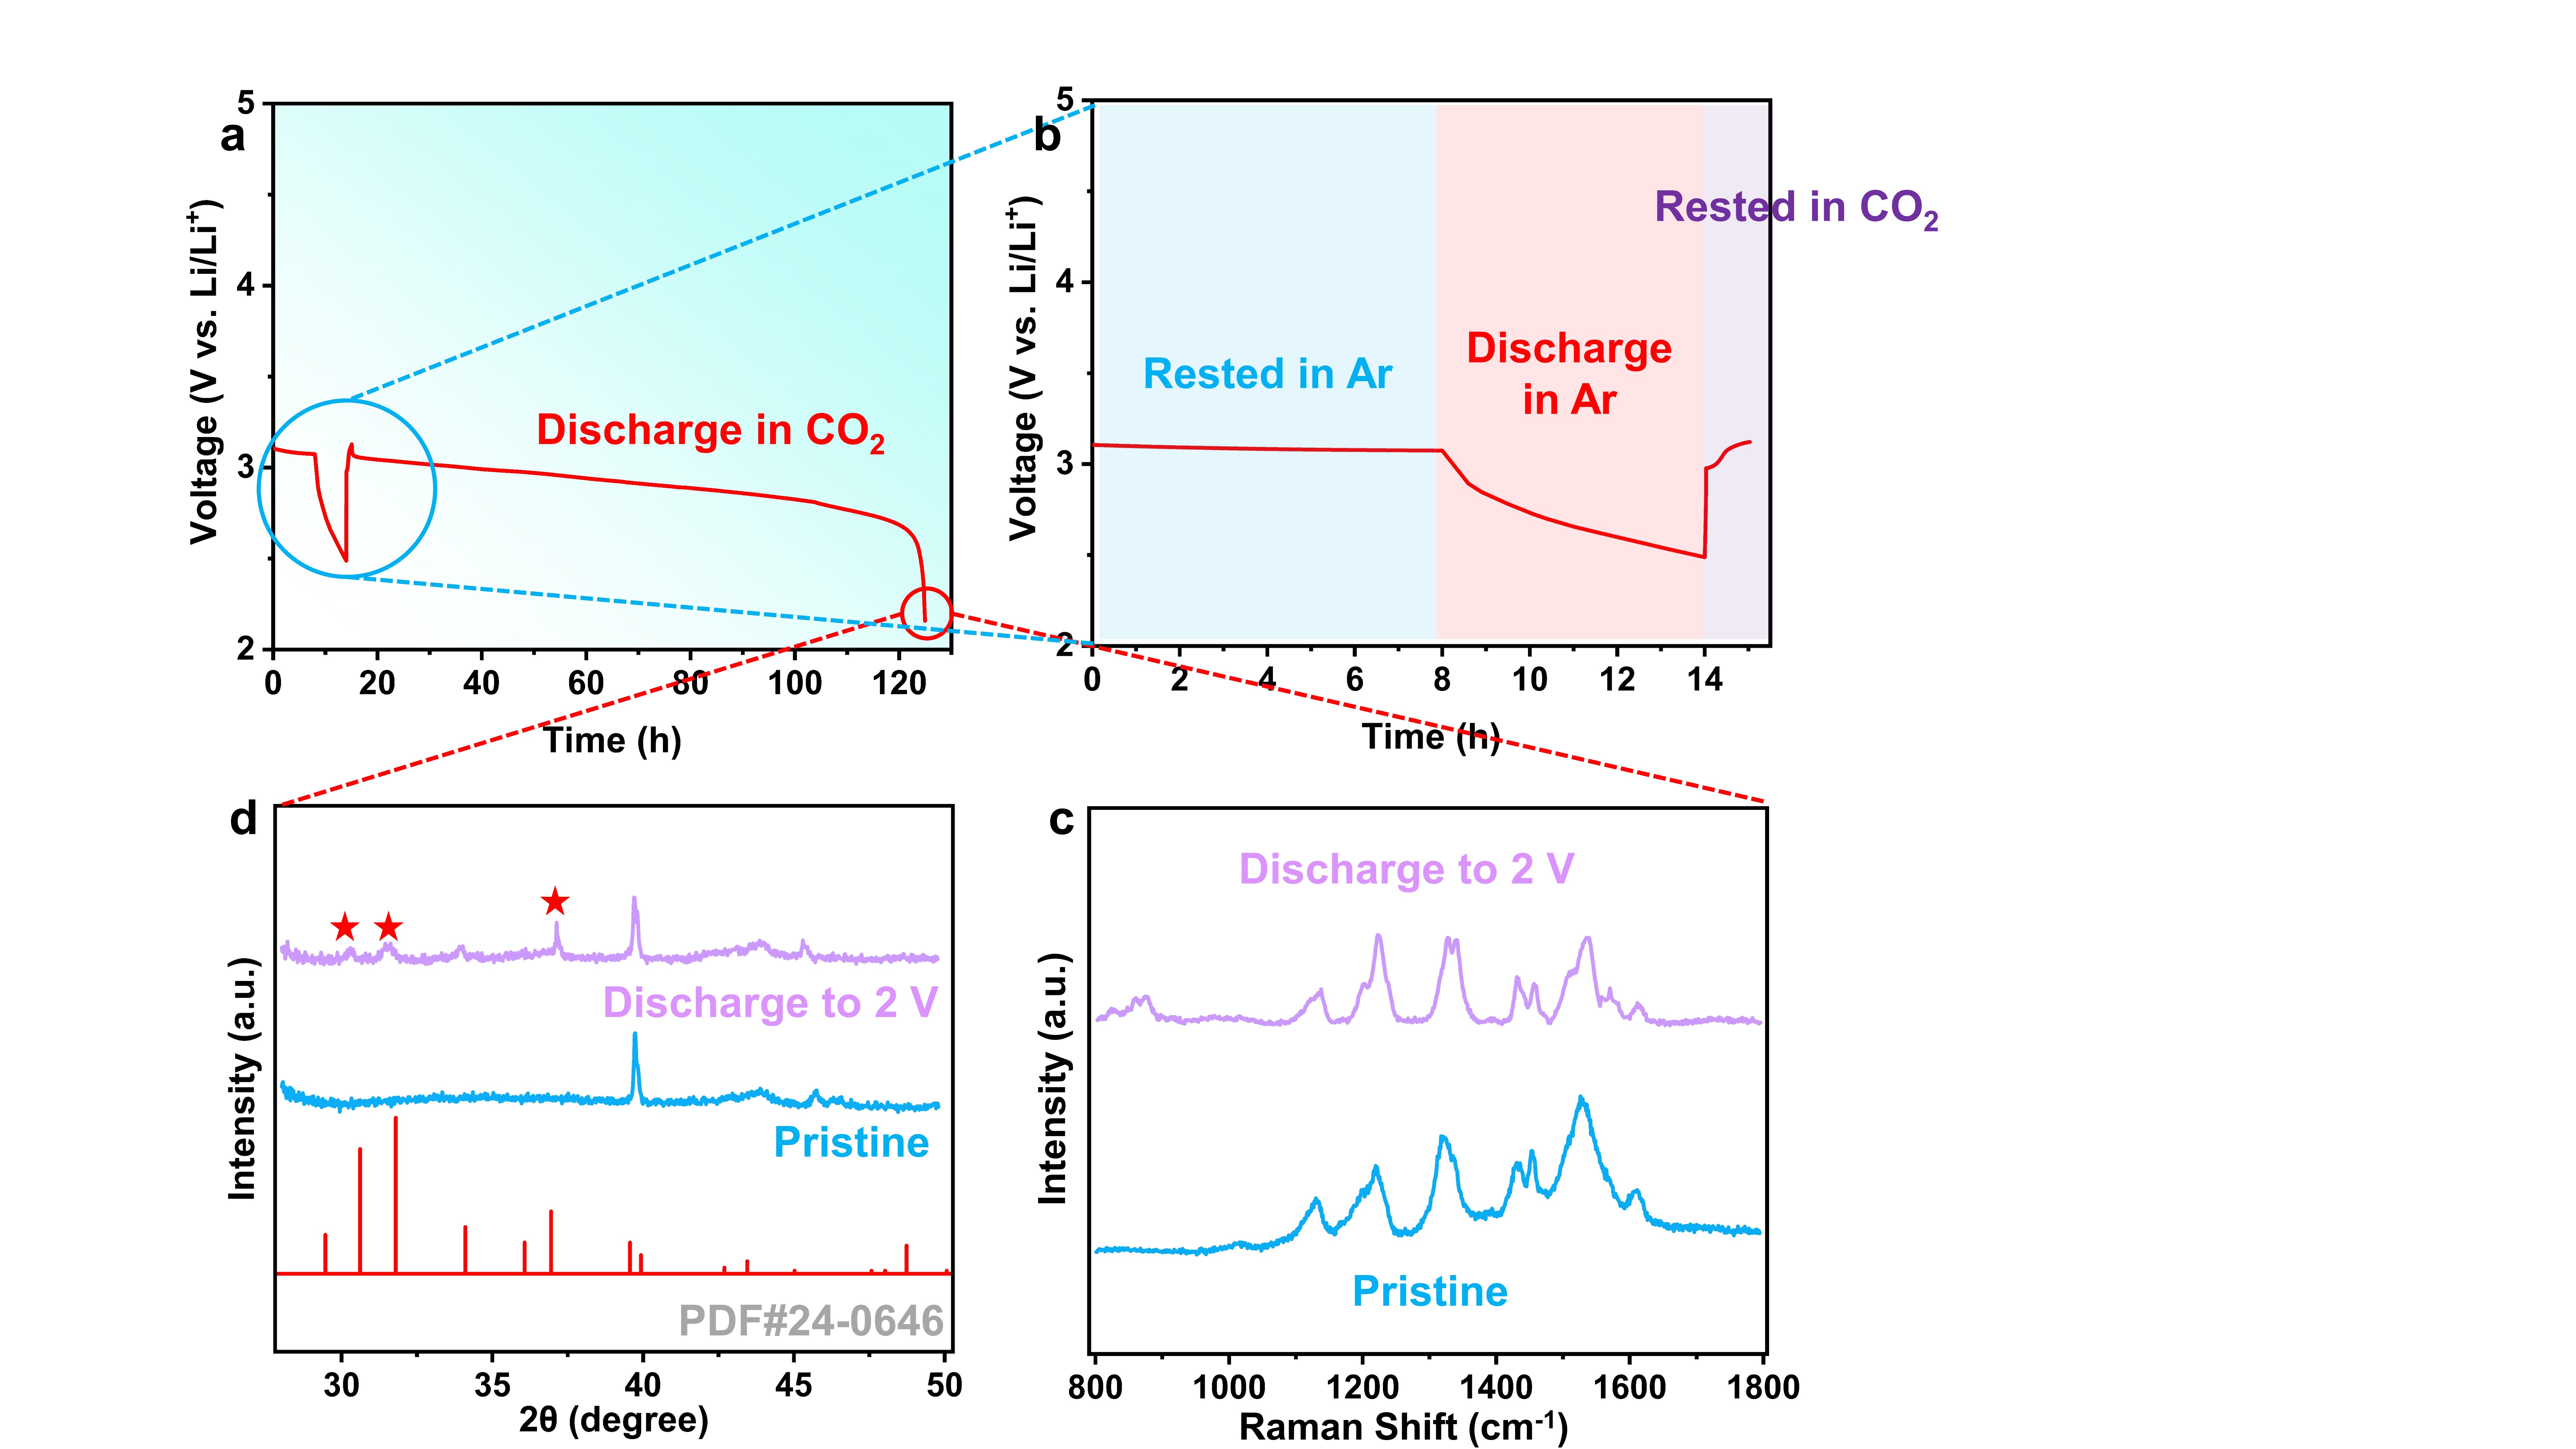


Figure S5. a) Discharge curve of Li-CO2 battery using pFeIIPc, first discharged in Ar and then in CO2. b) Magnified view of figure S5a. c) XRD pattern and d) Raman spectrum of discharge products.


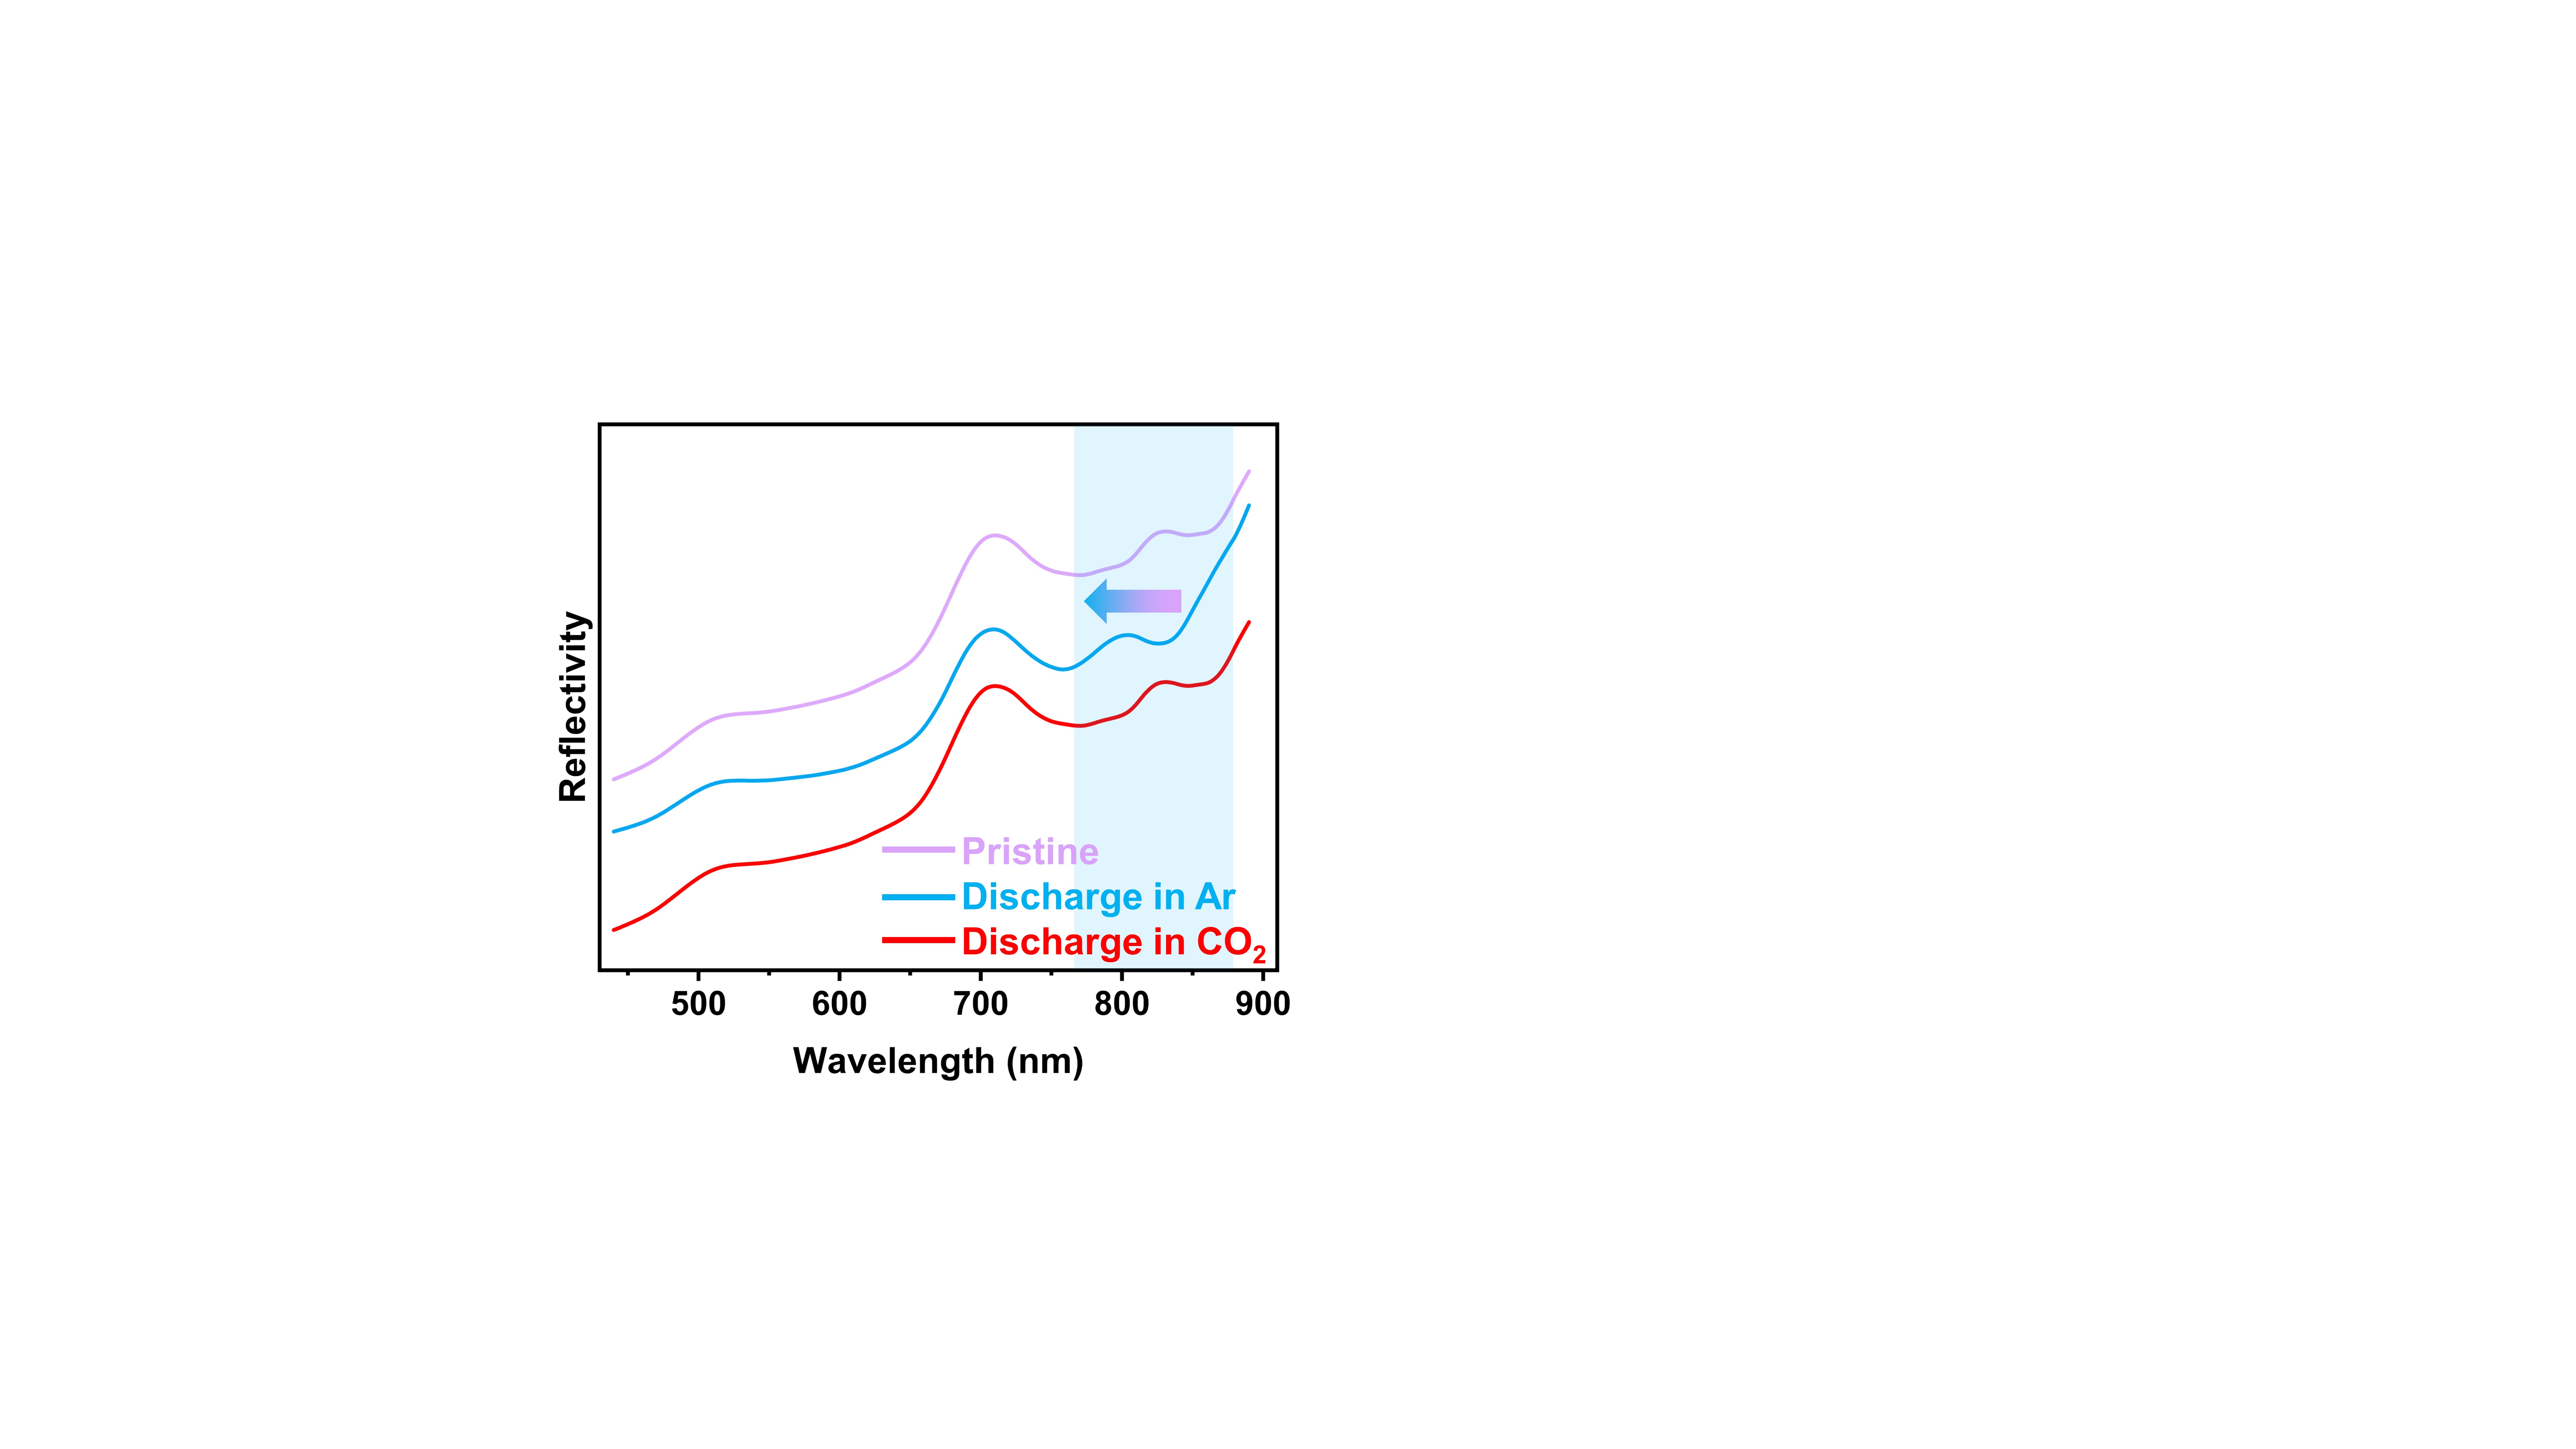


Figure S6. UV-vis spectra of the pristine state, after discharge in an Ar and in a CO2 atmosphere.


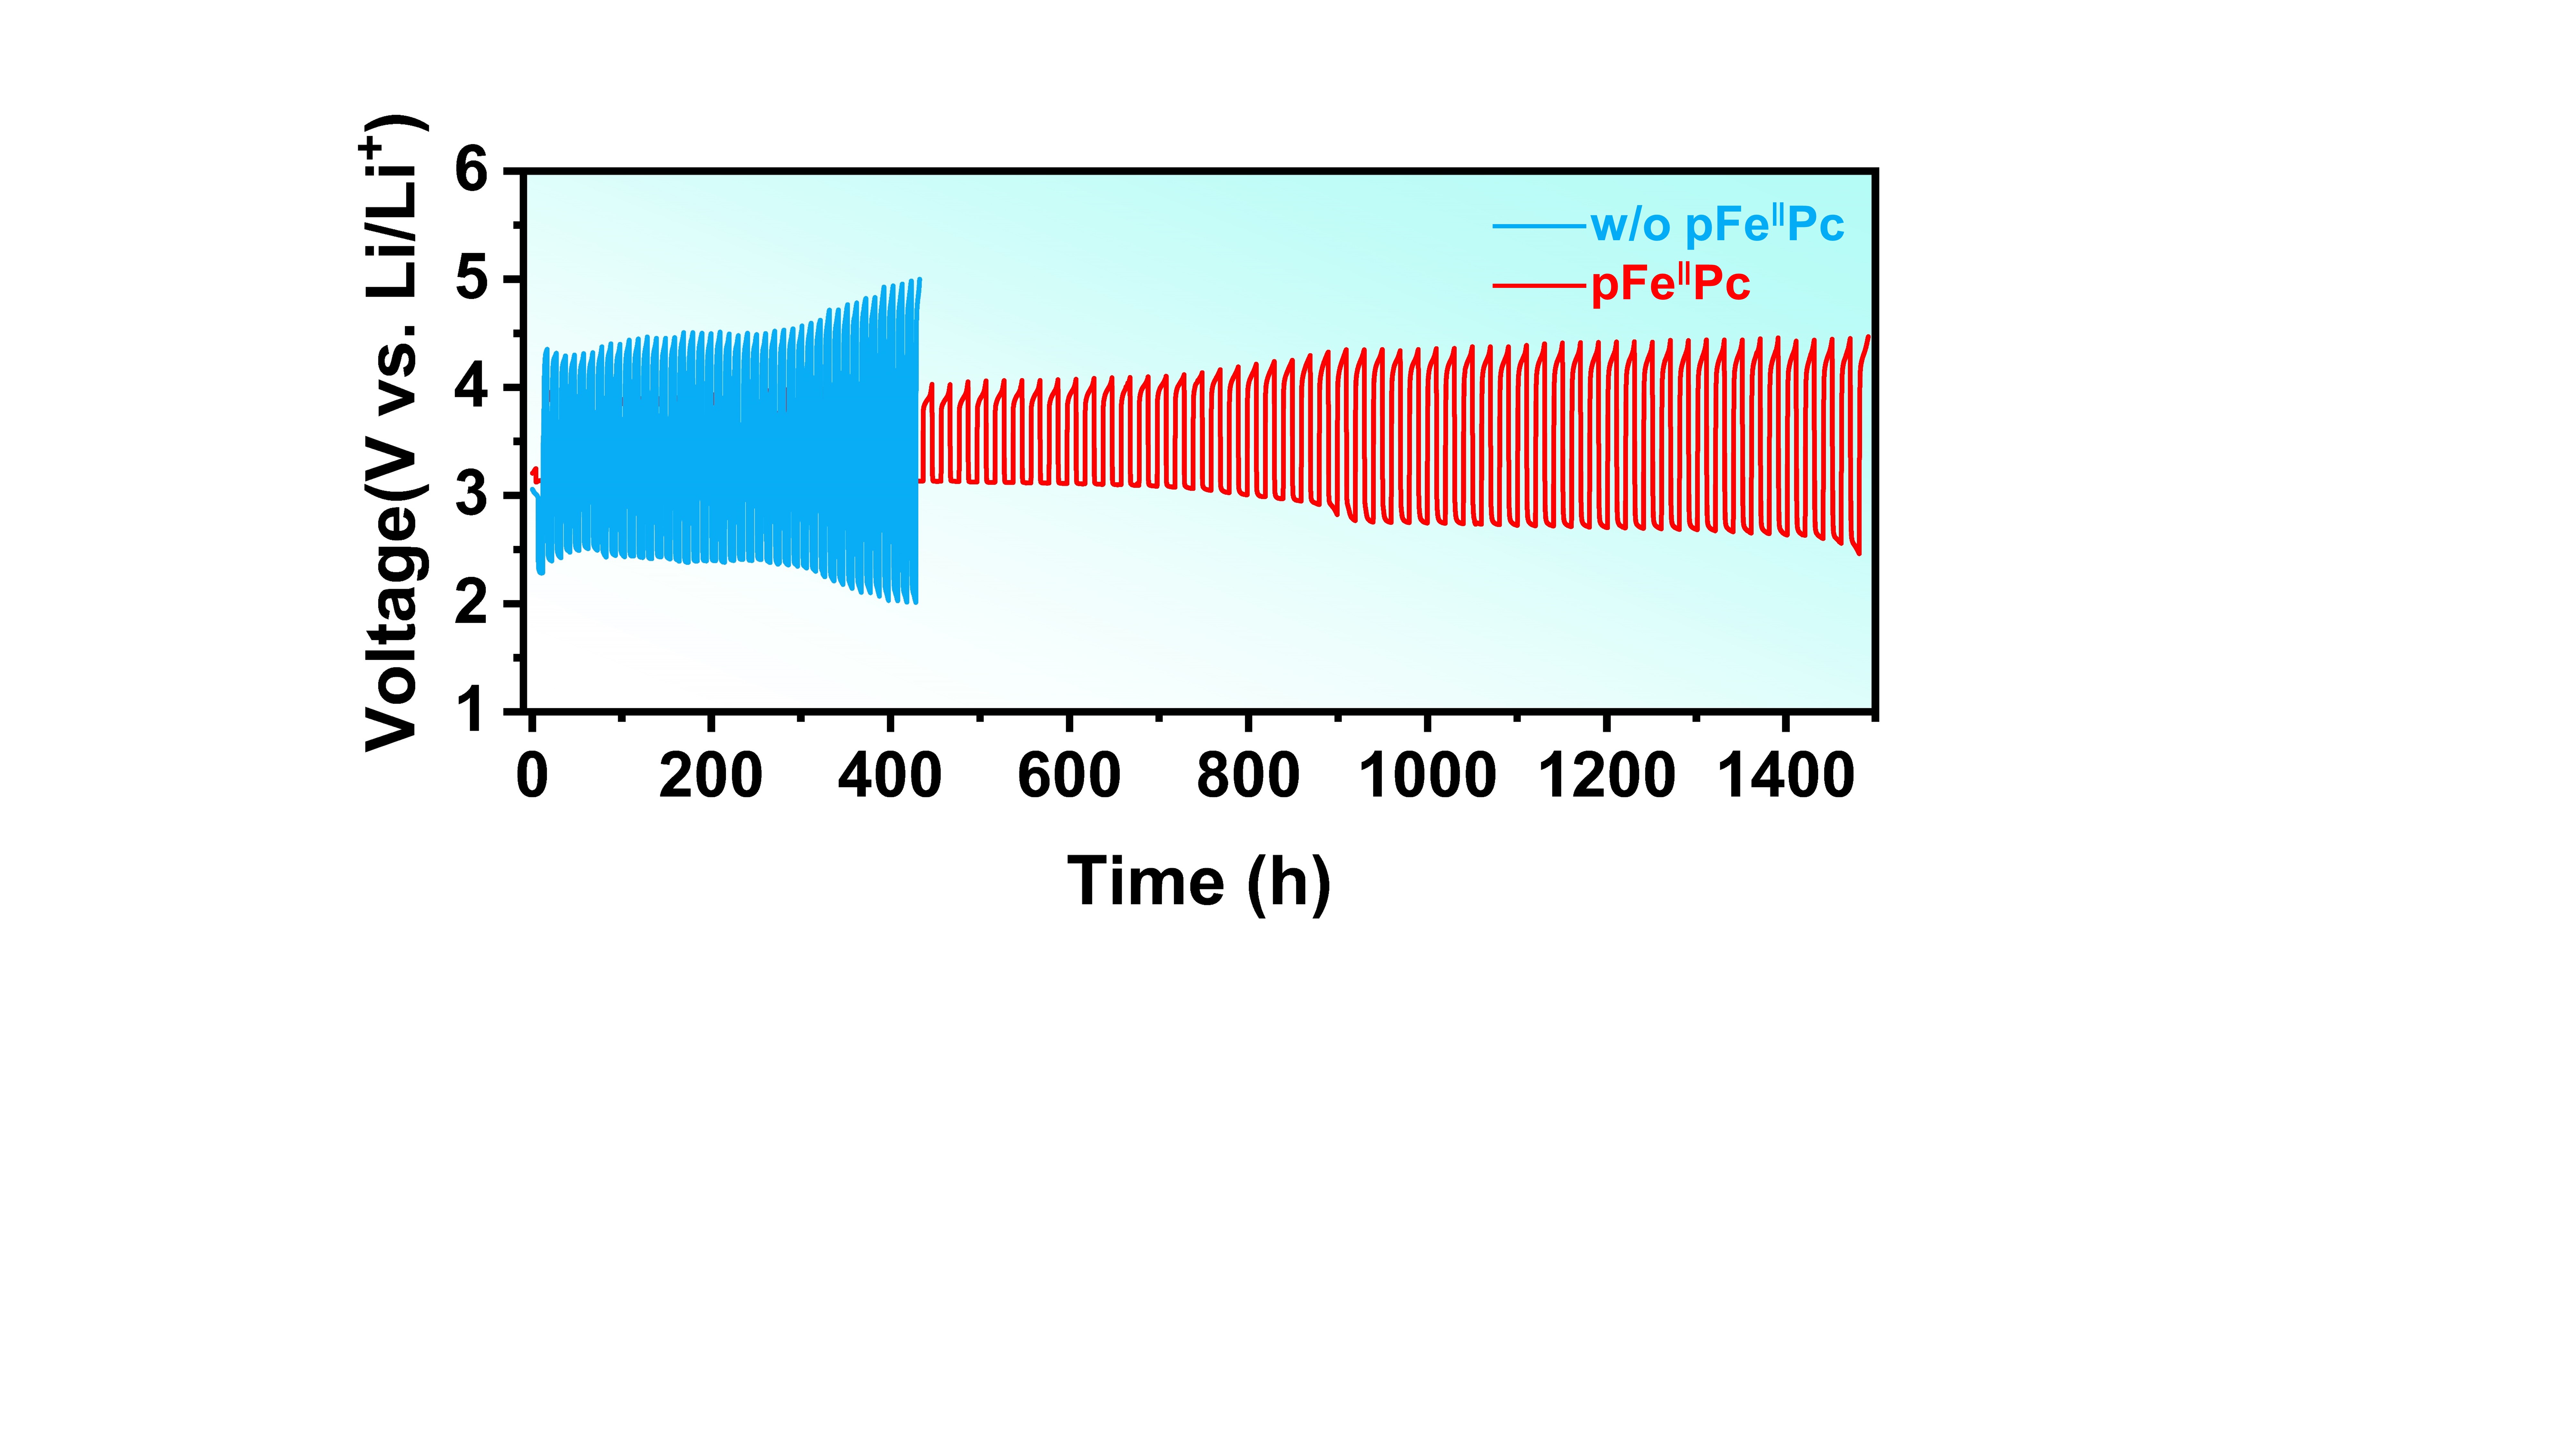


**Figure S7.** The cycling performance comparison of Li-CO2 batteries with and without pFe‖Pc.


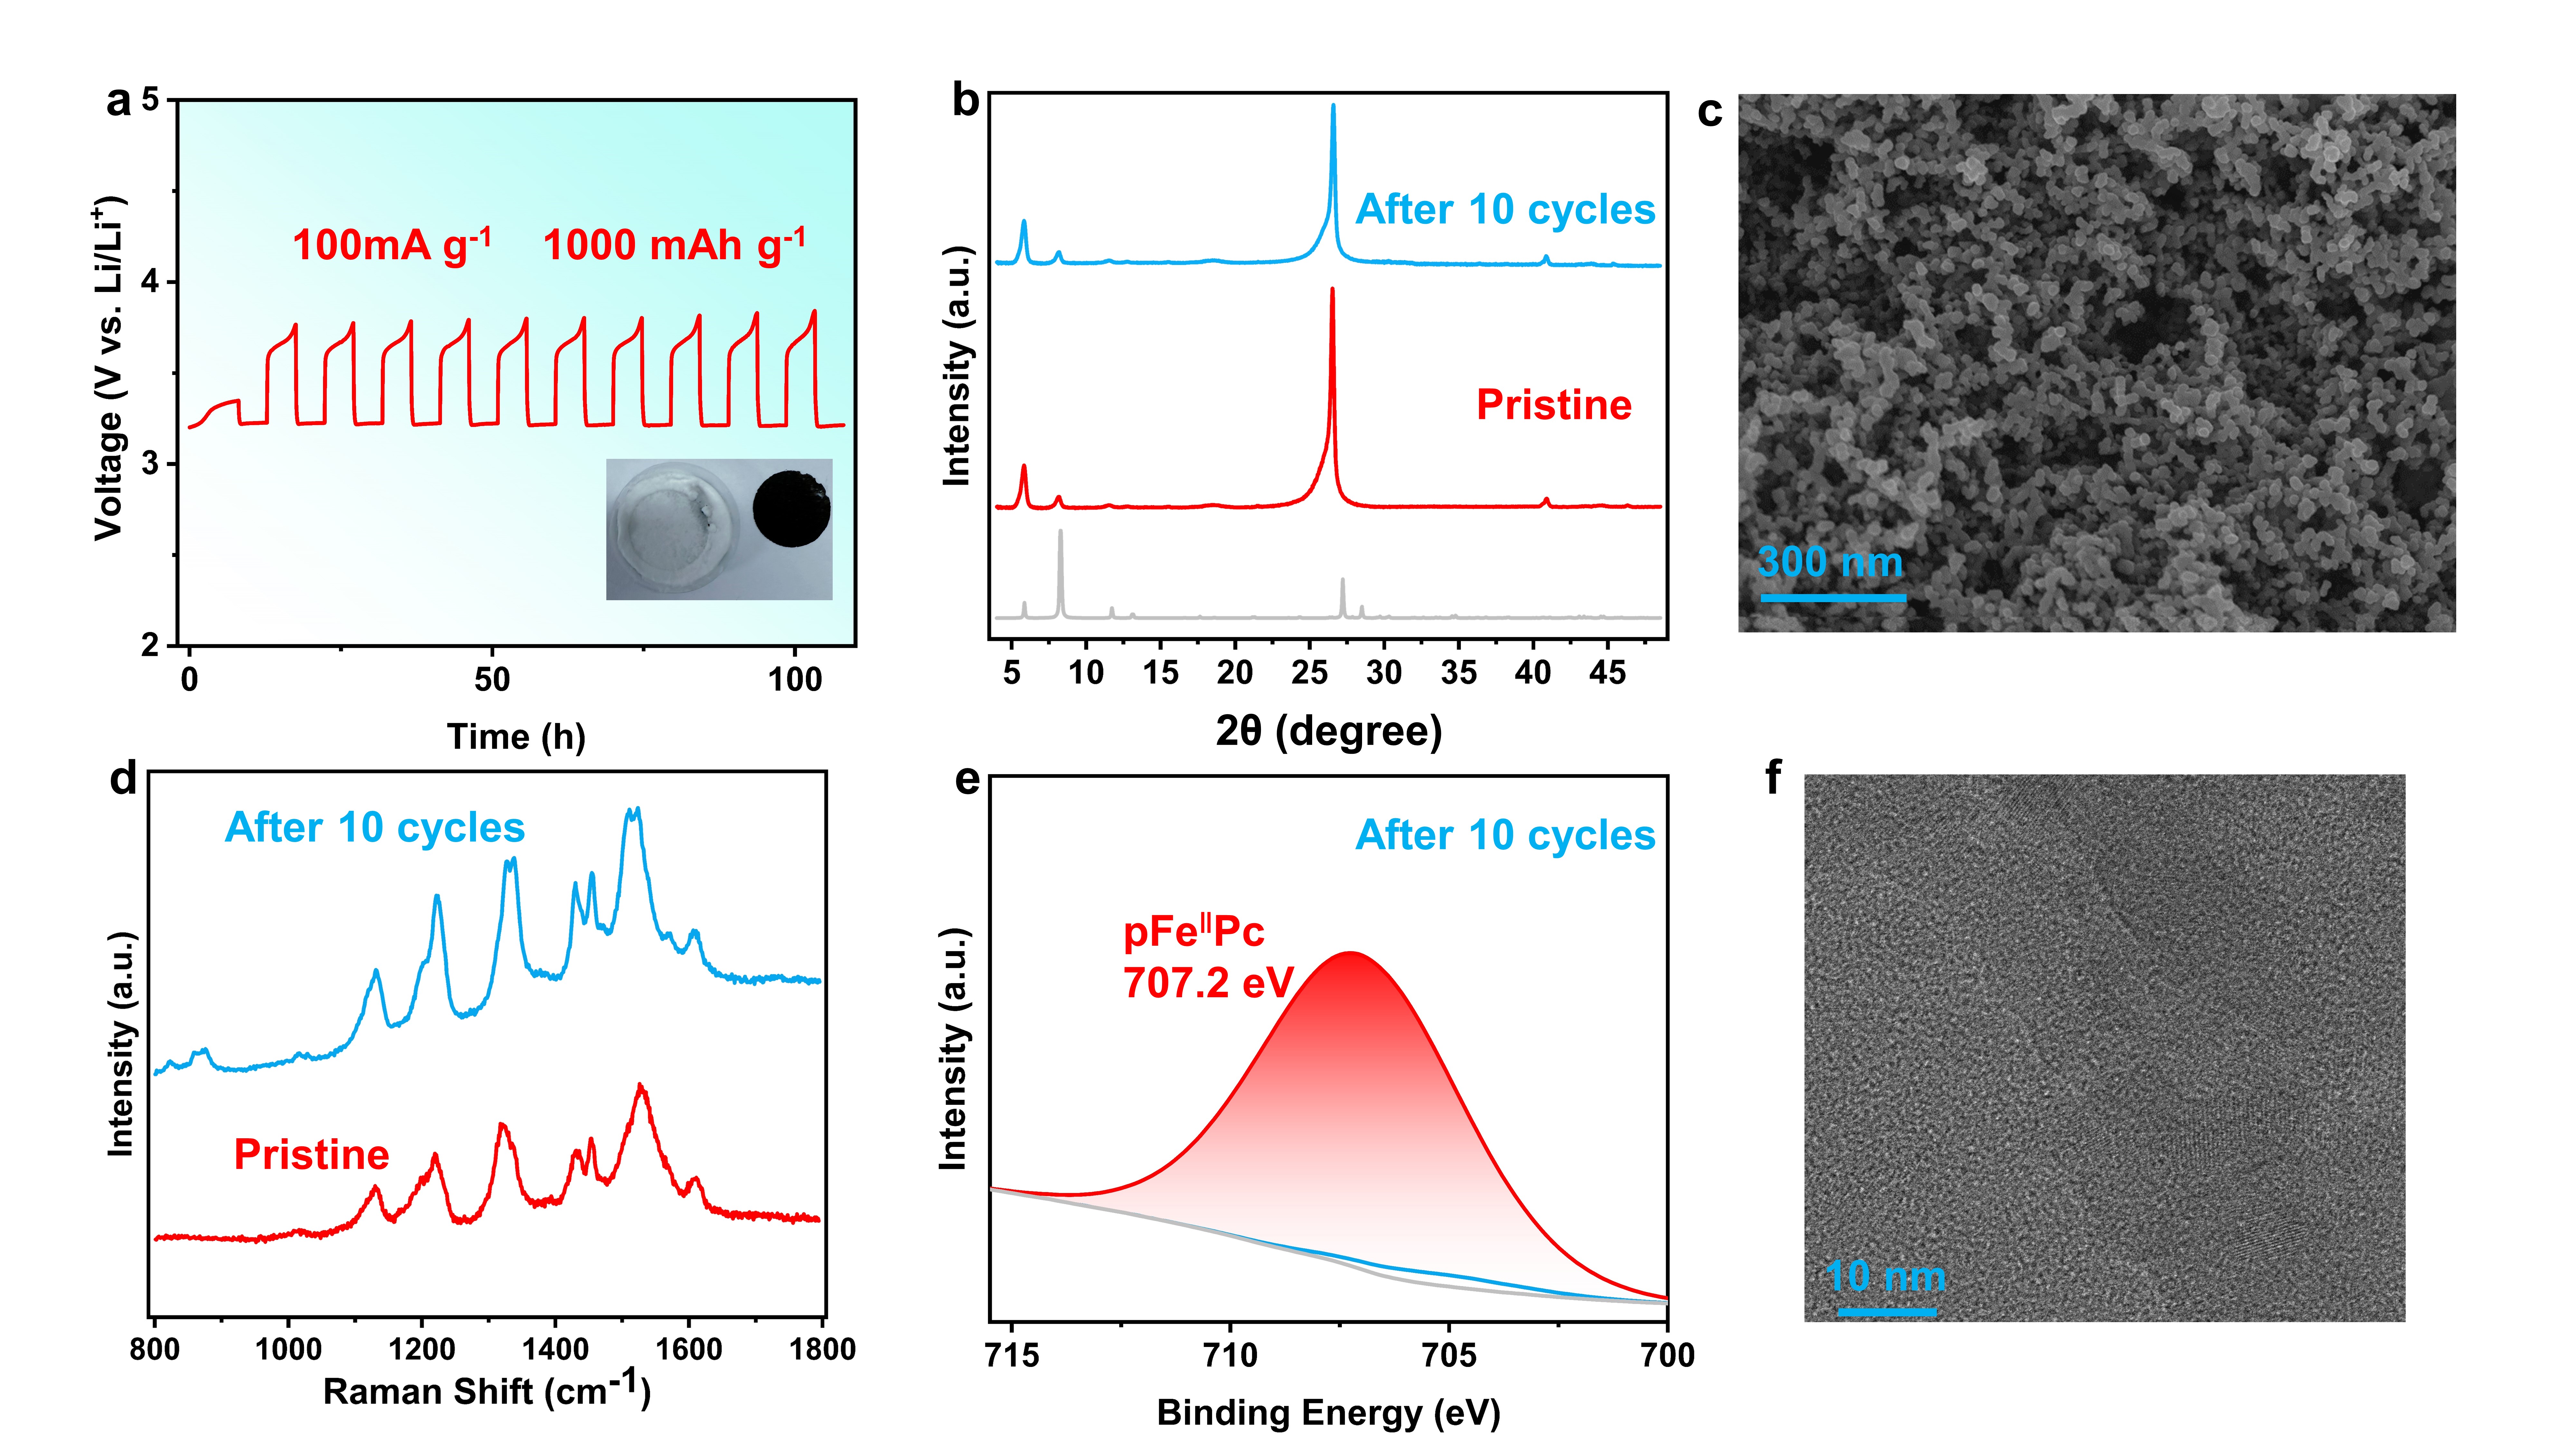
Figure S8. a) The charge-discharge curves of the Li-CO2 battery containing pFe‖Pc, cycled for 10 cycles at a current density of 100 mA g-1 with a cut-off capacity of 1000 mAh g-1. b) XRD pattern of the electrode in pristine state and after 10 cycles. c) SEM images after 10 cycles. d) Raman spectrum of the electrode in pristine state and after 10 cycles. e) XPS spectrum of the electrode in pristine state and after 10 cycles. f) TEM images after 10 cycles.


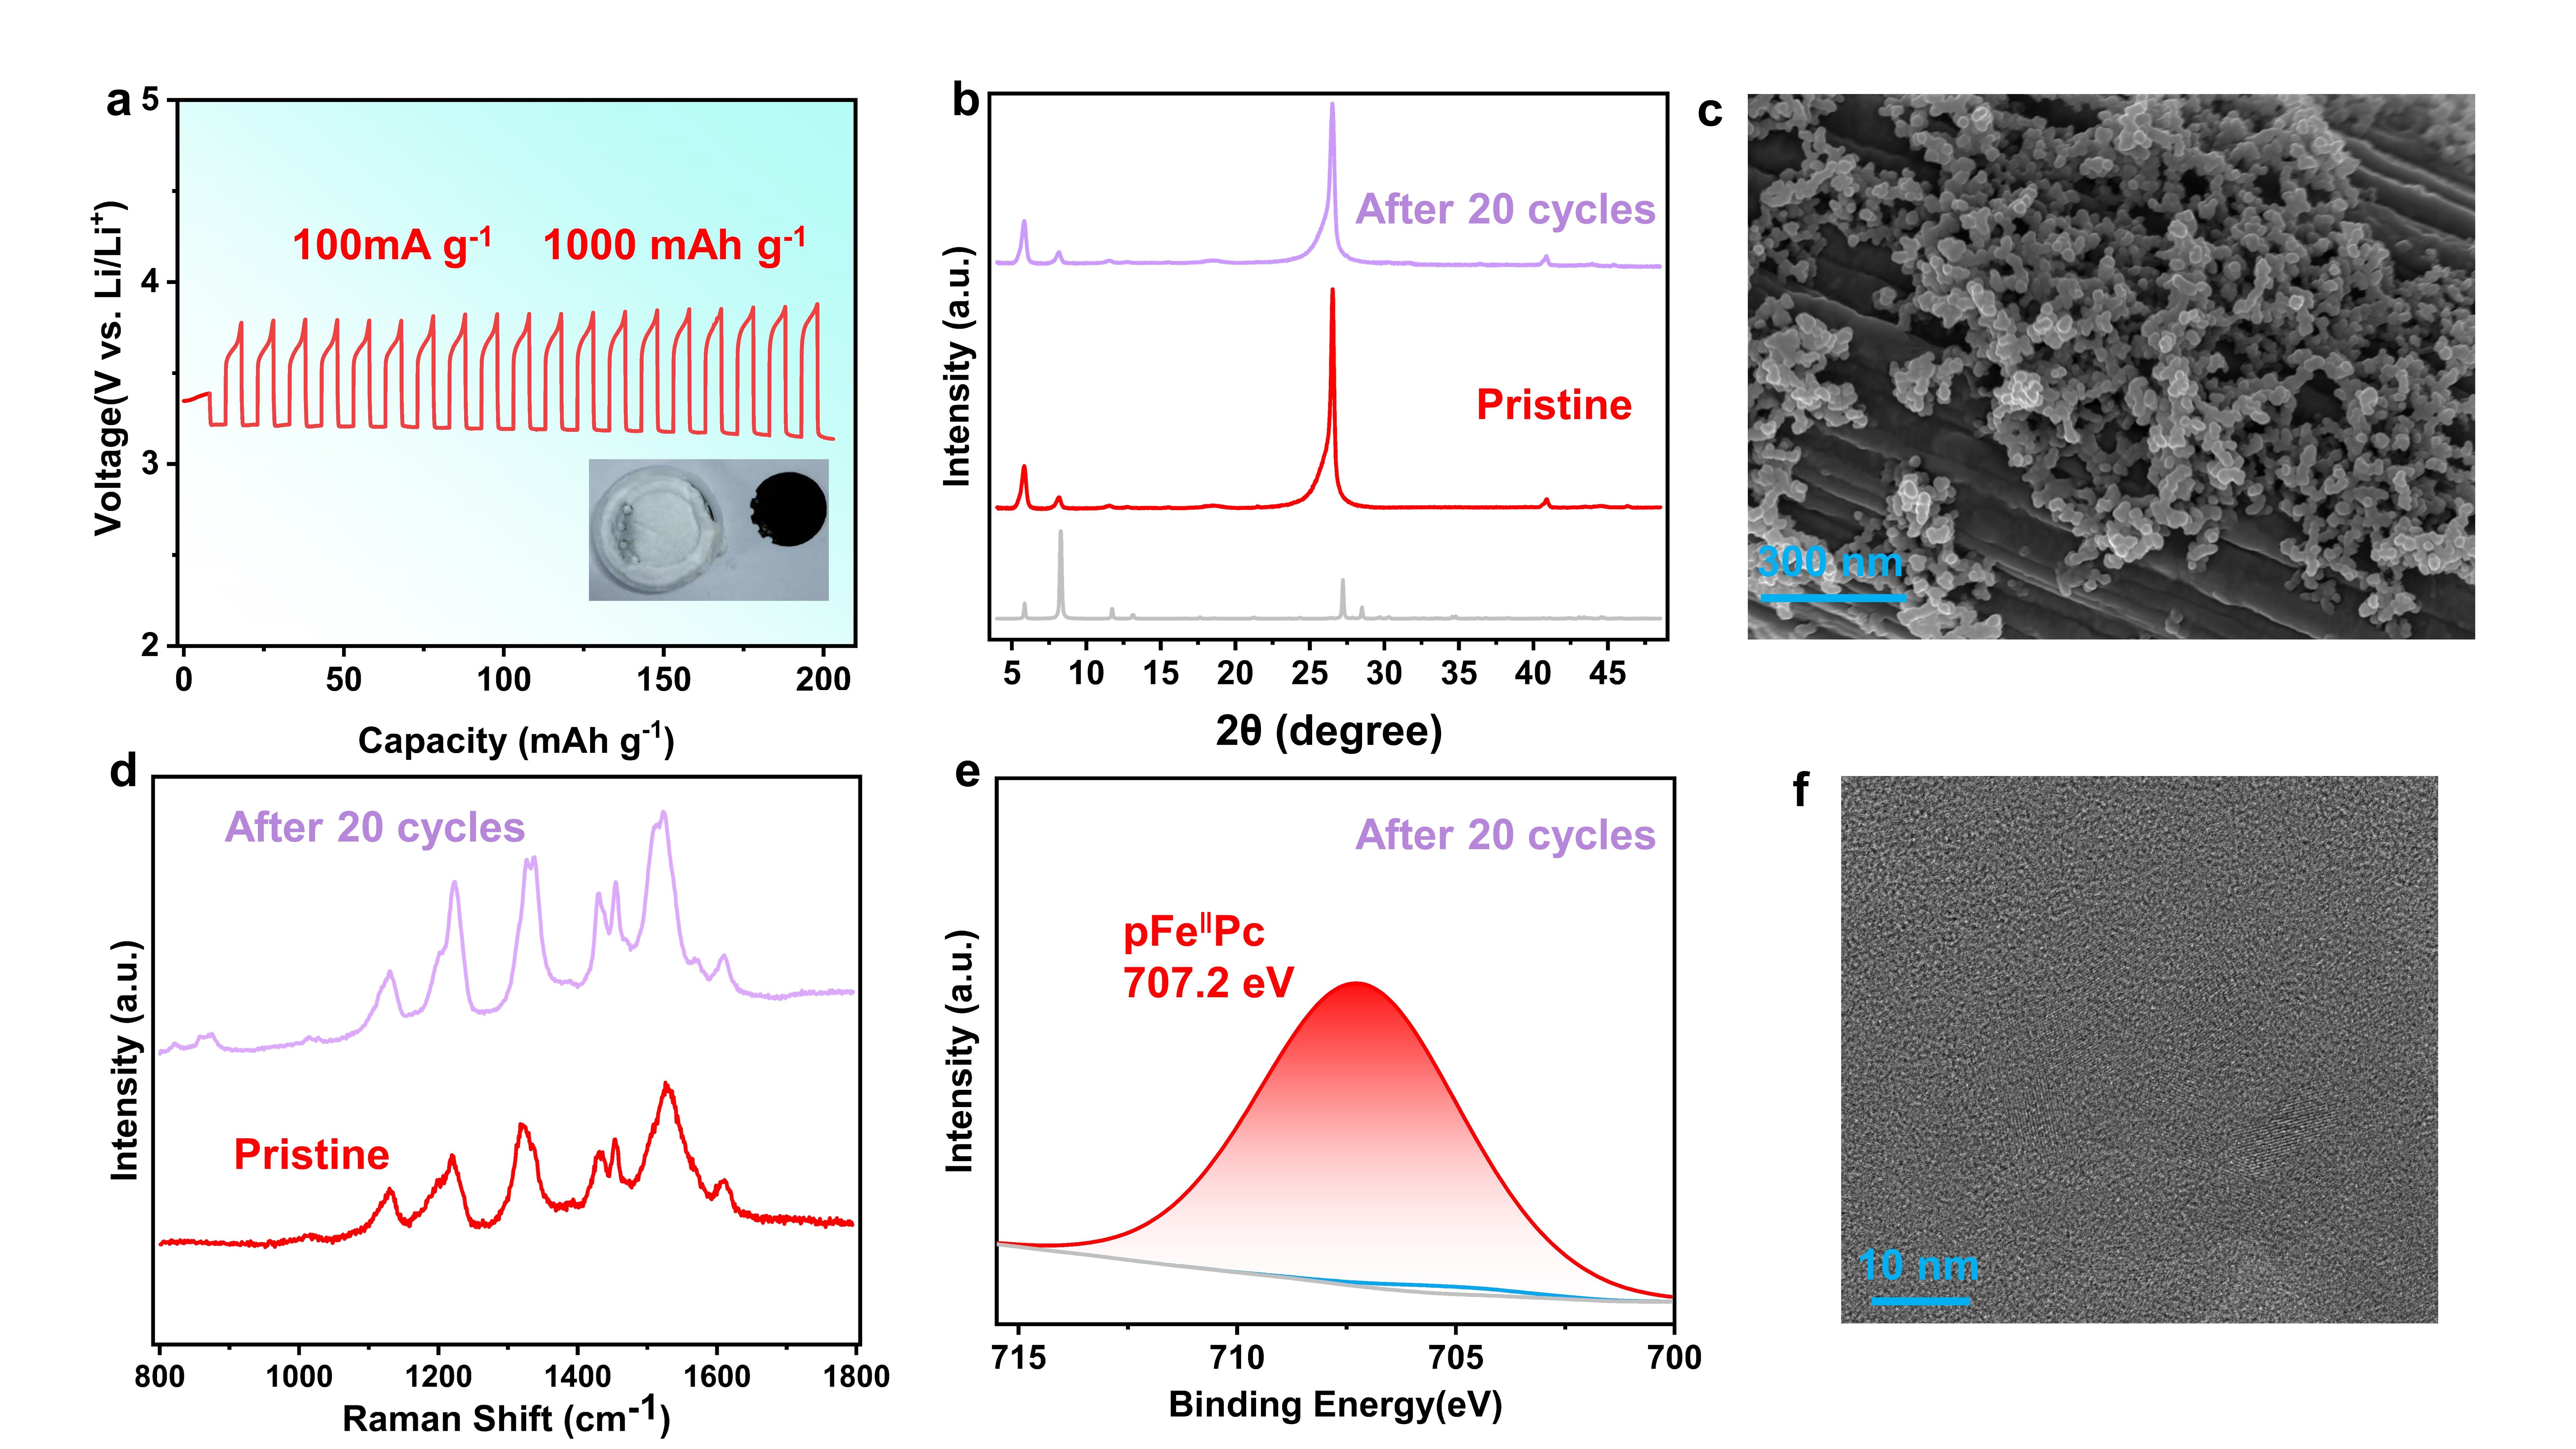


Figure S9. a) The charge-discharge curves of the Li-CO2 battery containing pFe‖Pc, cycled for 20 cycles at a current density of 100 mA g-1 with a cut-off capacity of 1000 mAh g-1. b) XRD pattern of the electrode in pristine state and after 20 cycles. c) SEM images after 20 cycles. d) Raman spectrum of the electrode in pristine state and after 20 cycles. e) XPS spectrum of the electrode in pristine state and after 20 cycles. f) TEM images after 20 cycles.


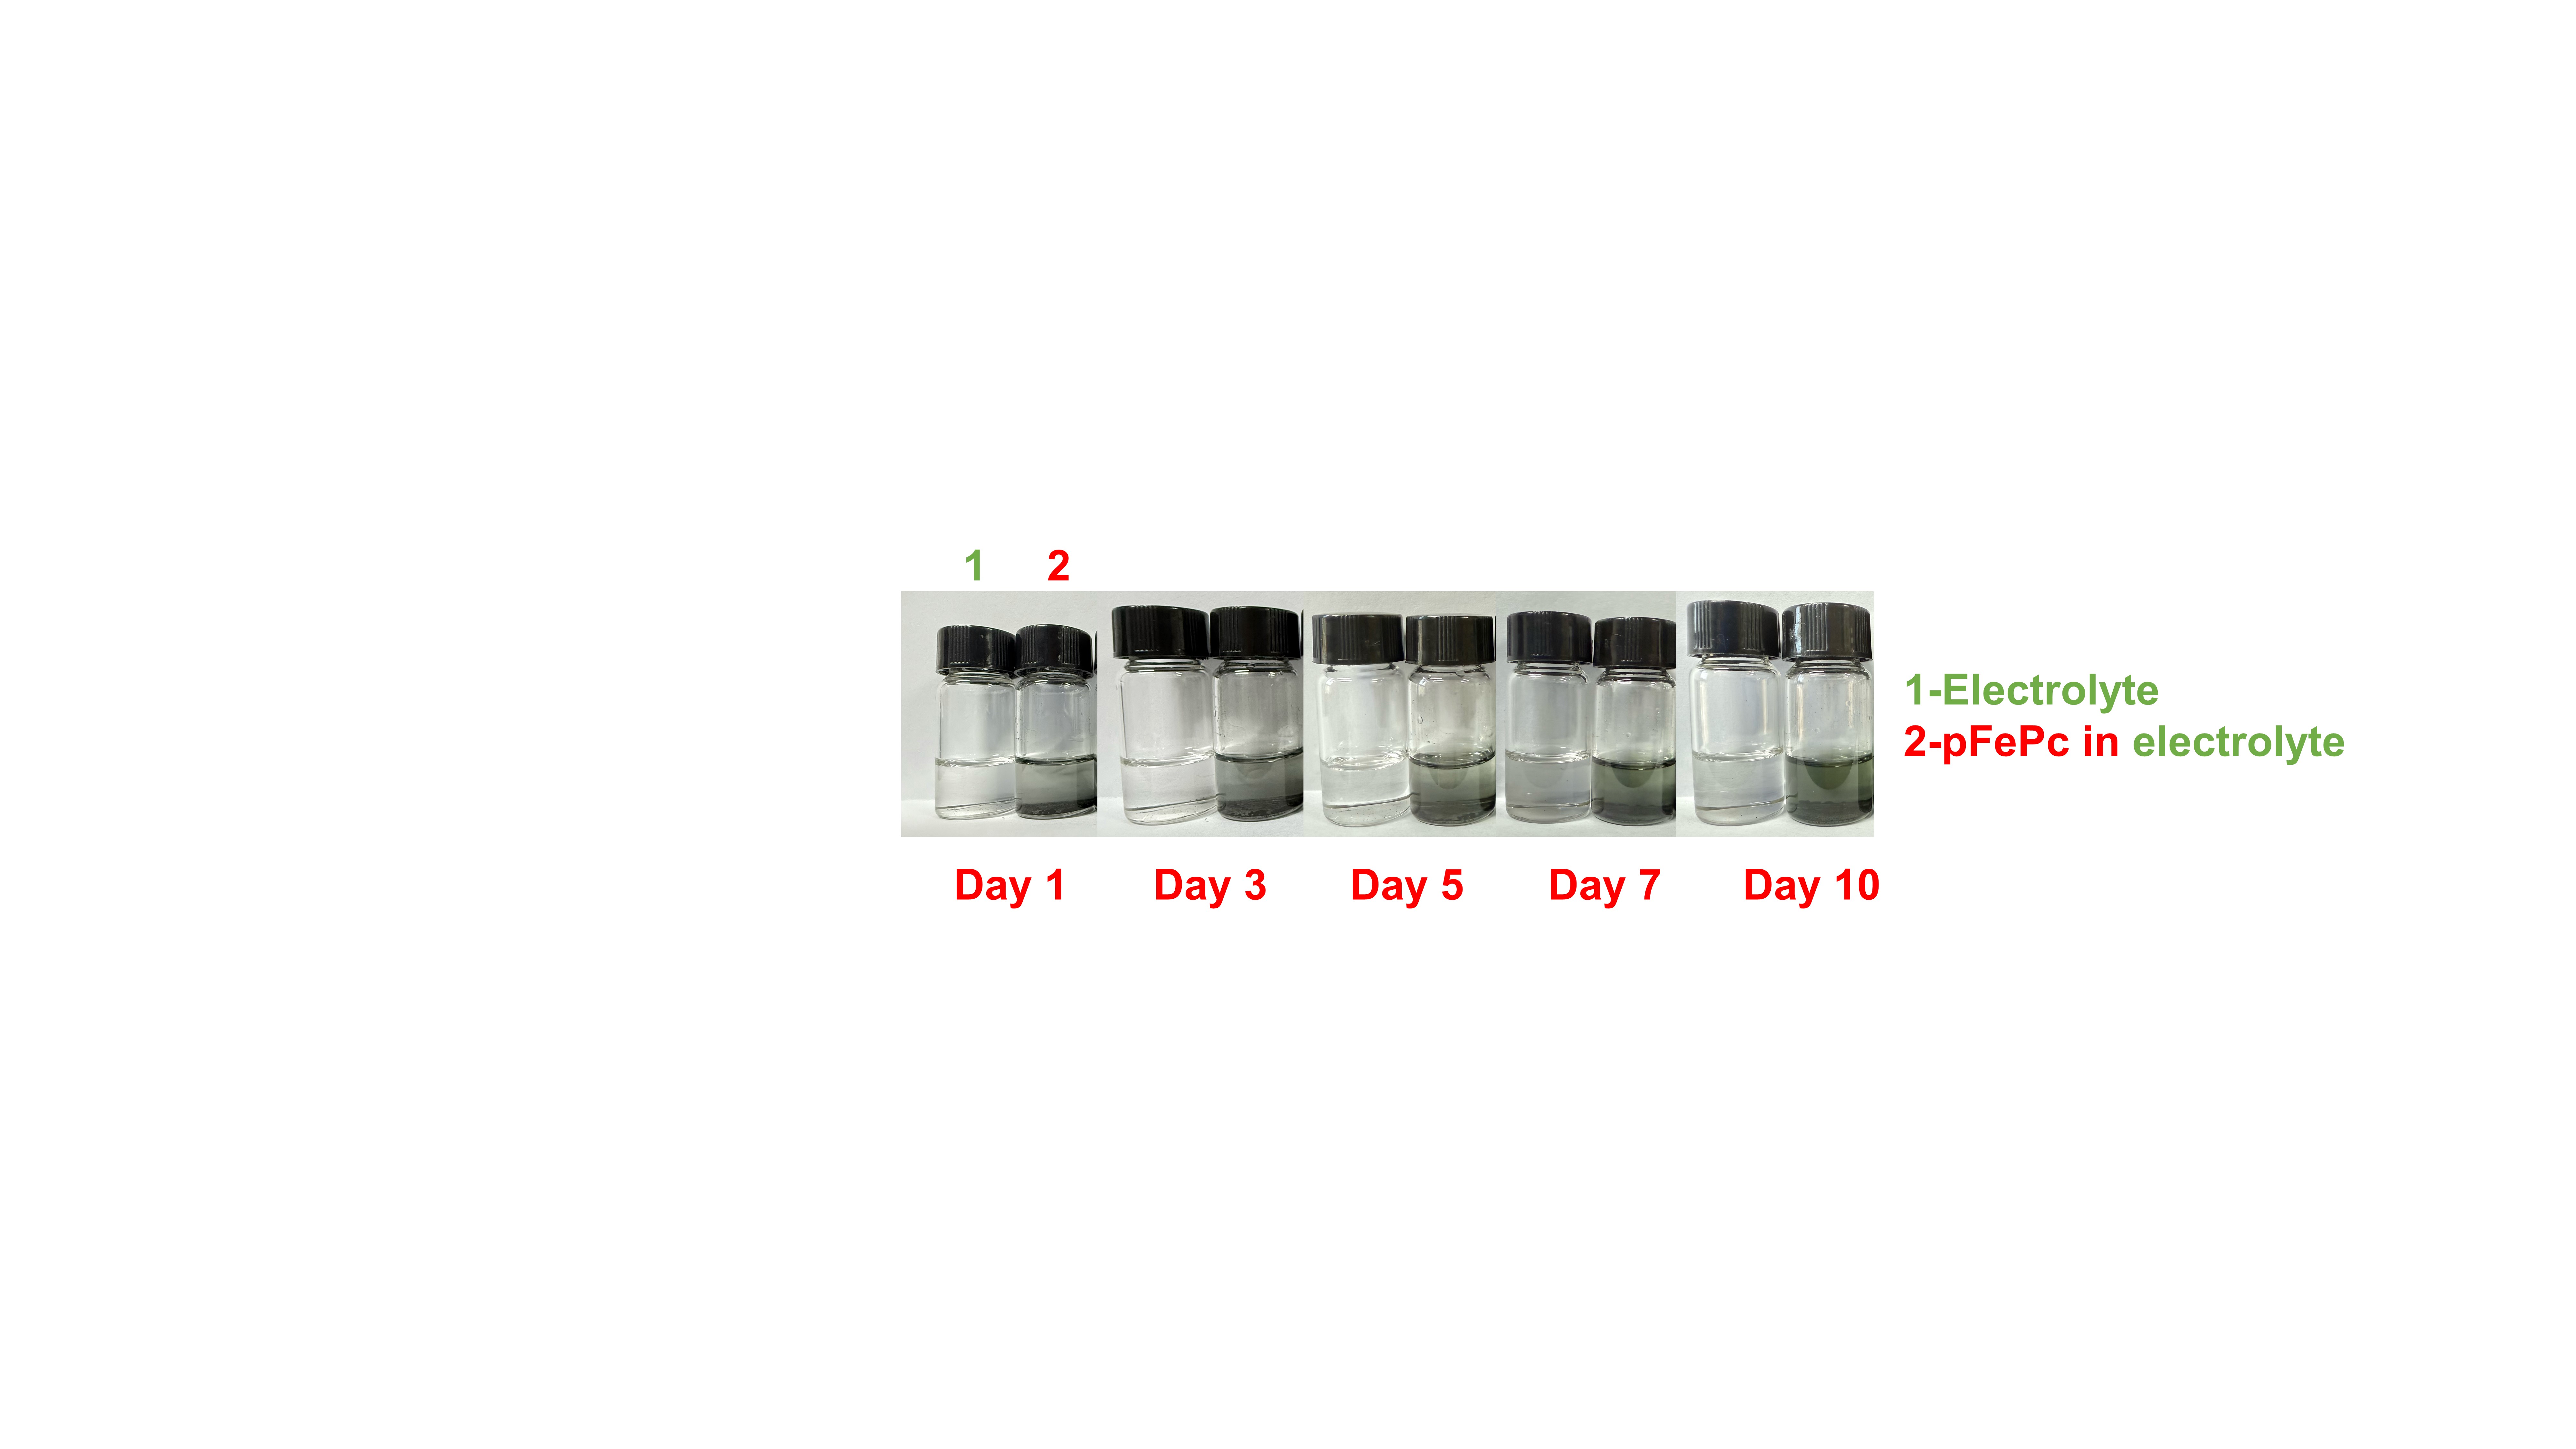


Figure S10. The dissolution behavior of pFeIIPc in LiTFSI/TEGDME solutions at different times.


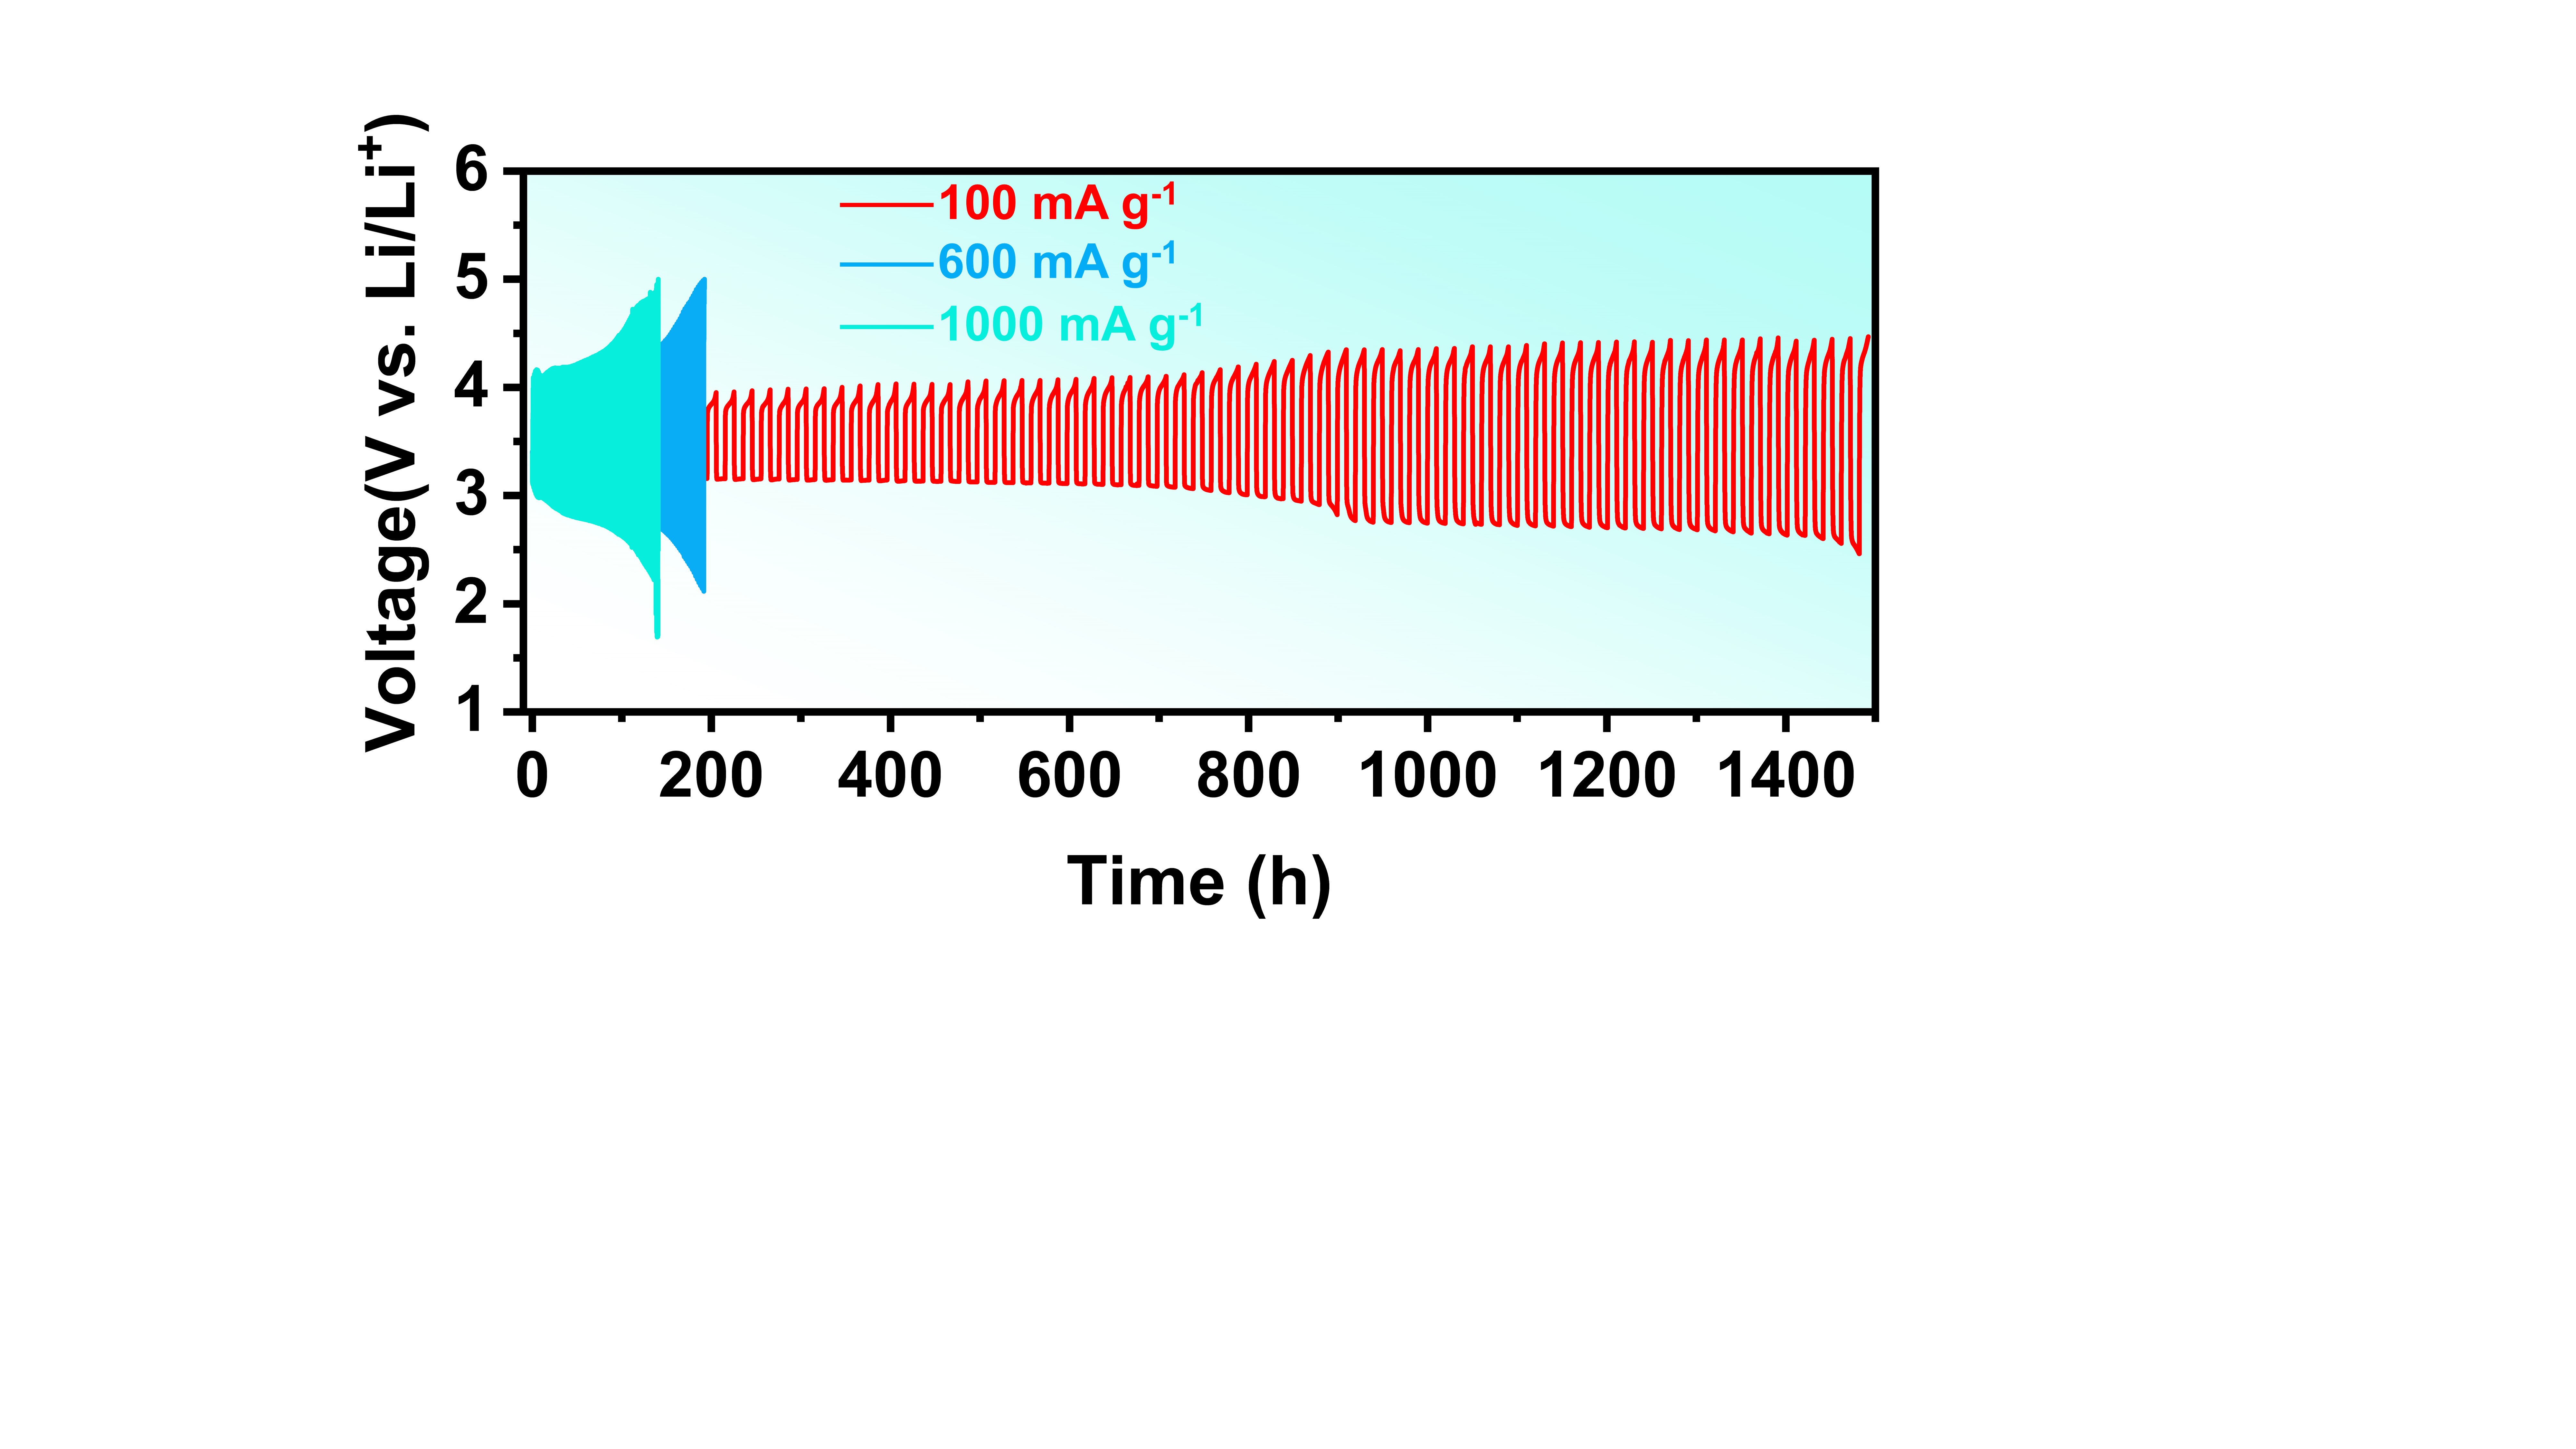


**Figure S11.** The cycling performance comparison of Li-CO2 batteries with pFe‖Pc at 100, 600 and 1000 mA g-1, respectively.


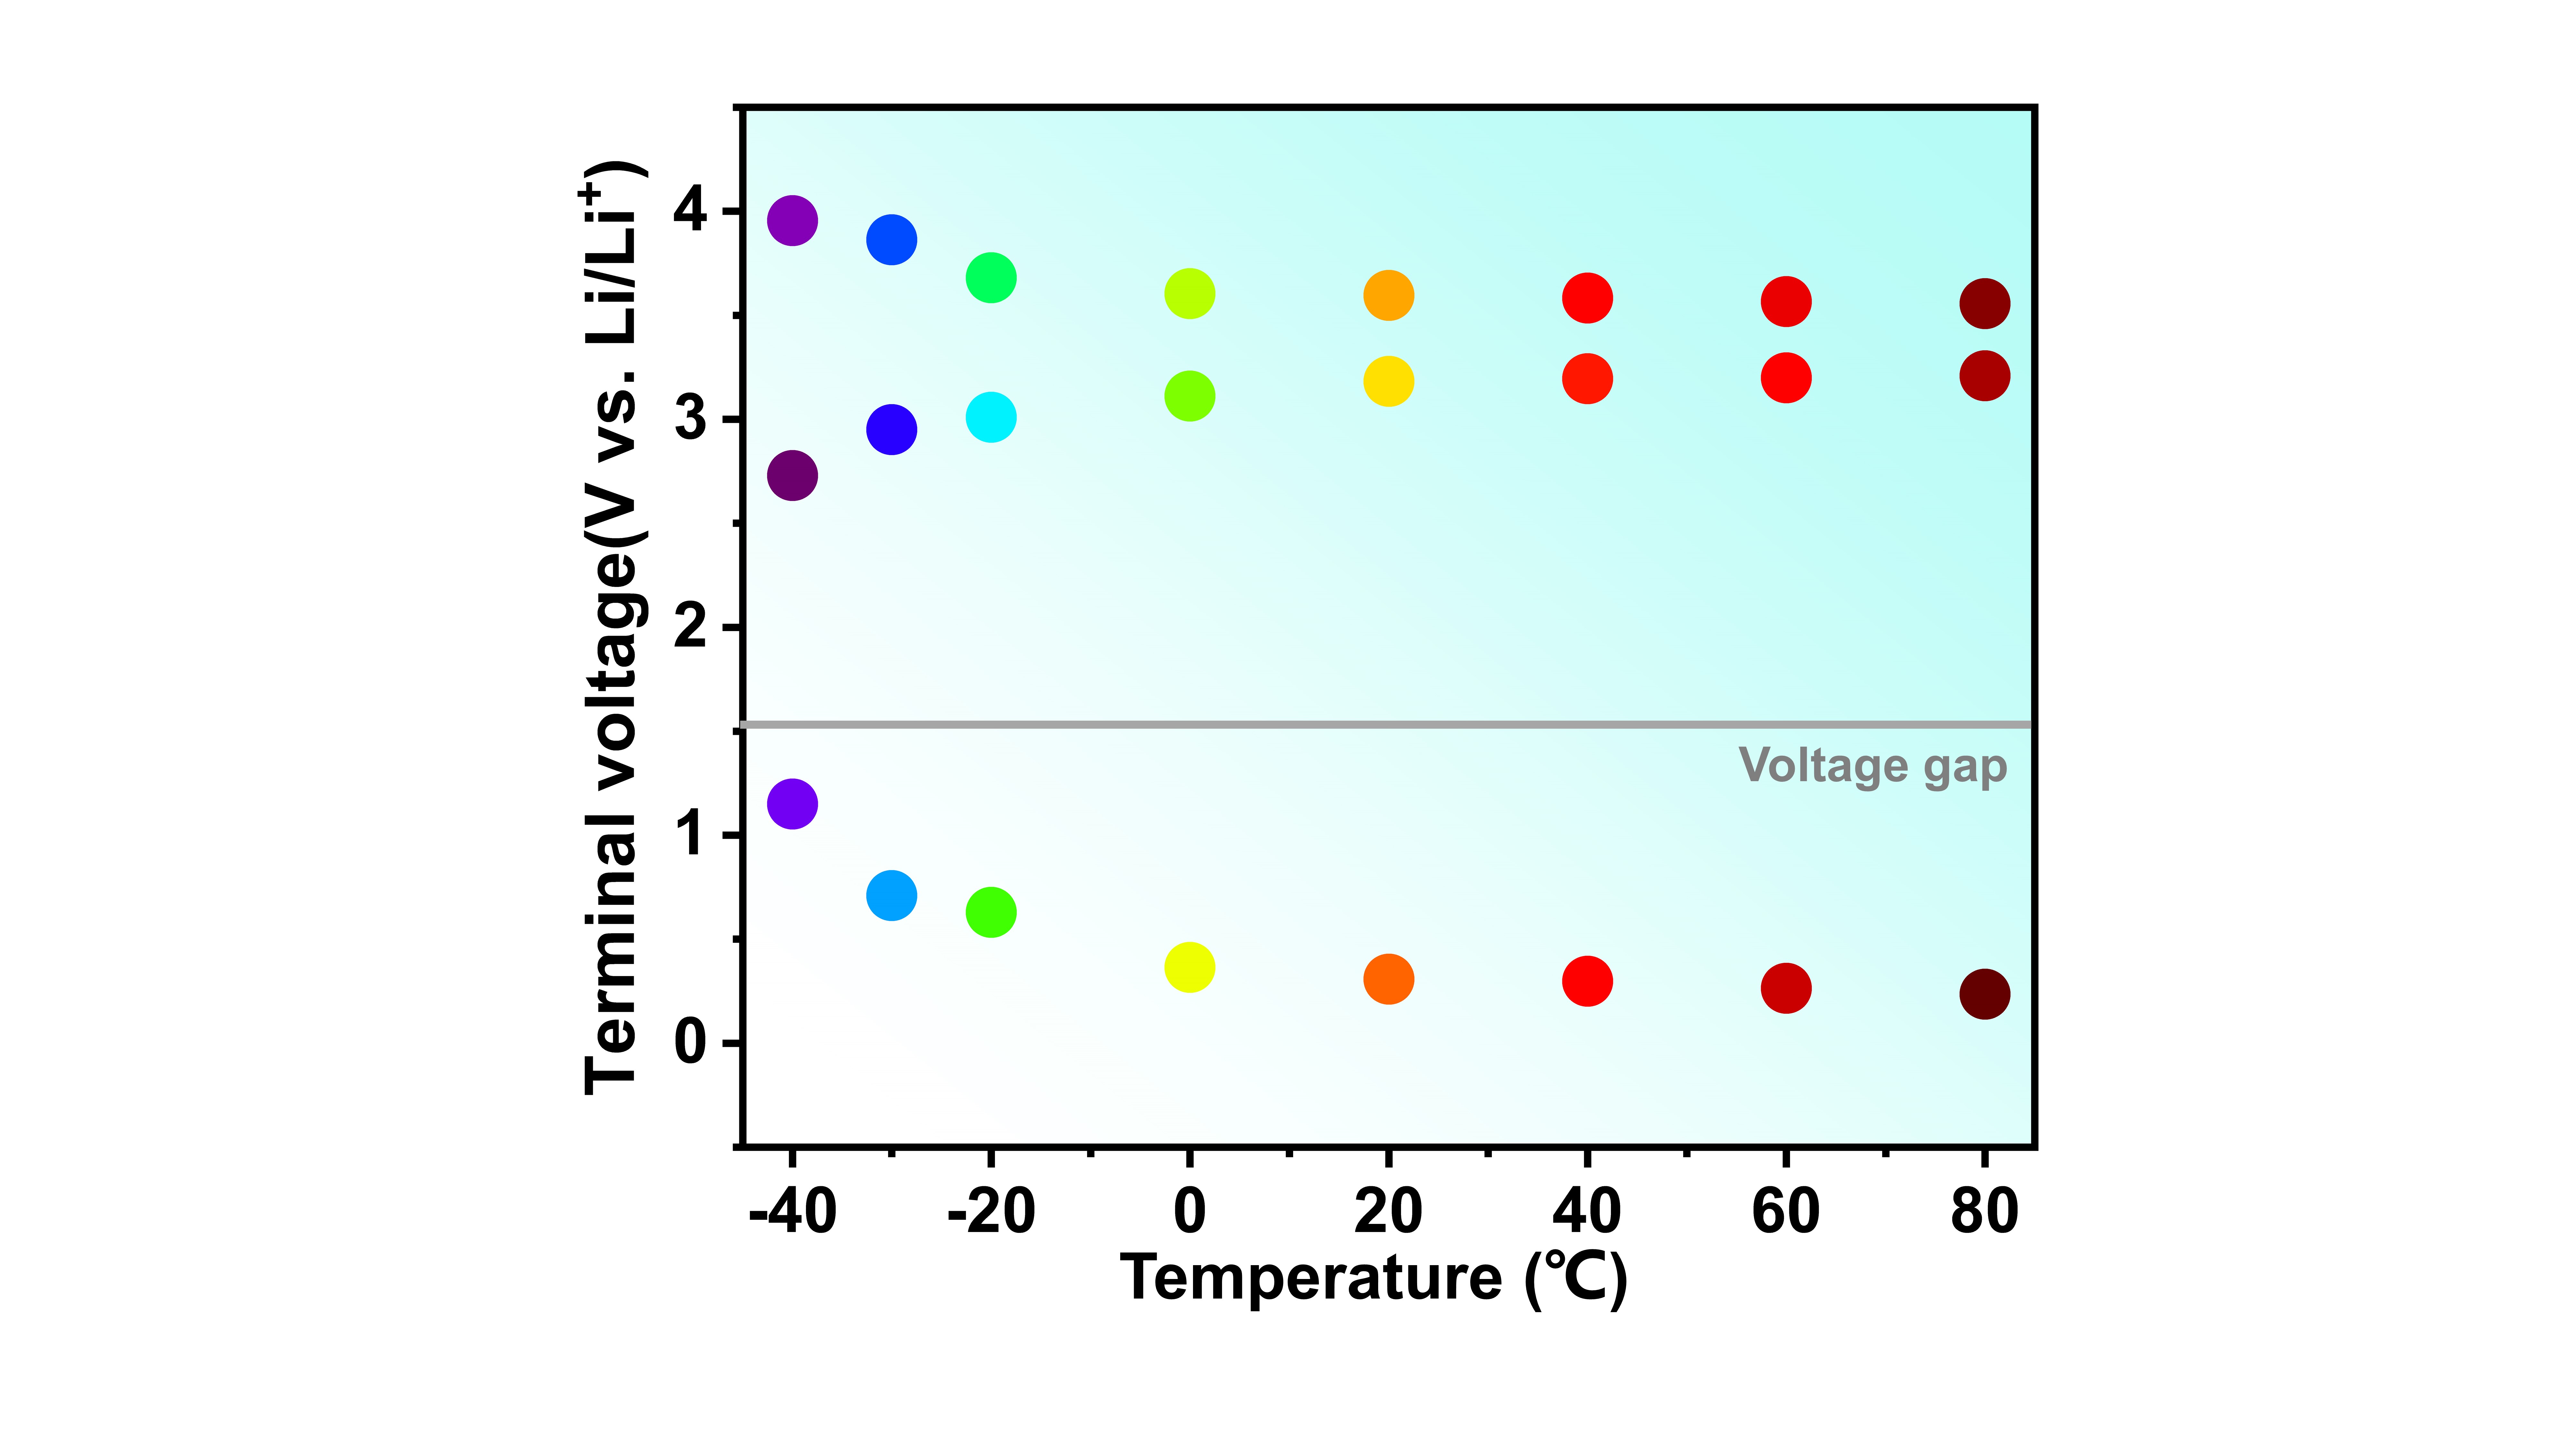


**Figure S12.** Median voltage and voltage gap of Figure 1h.


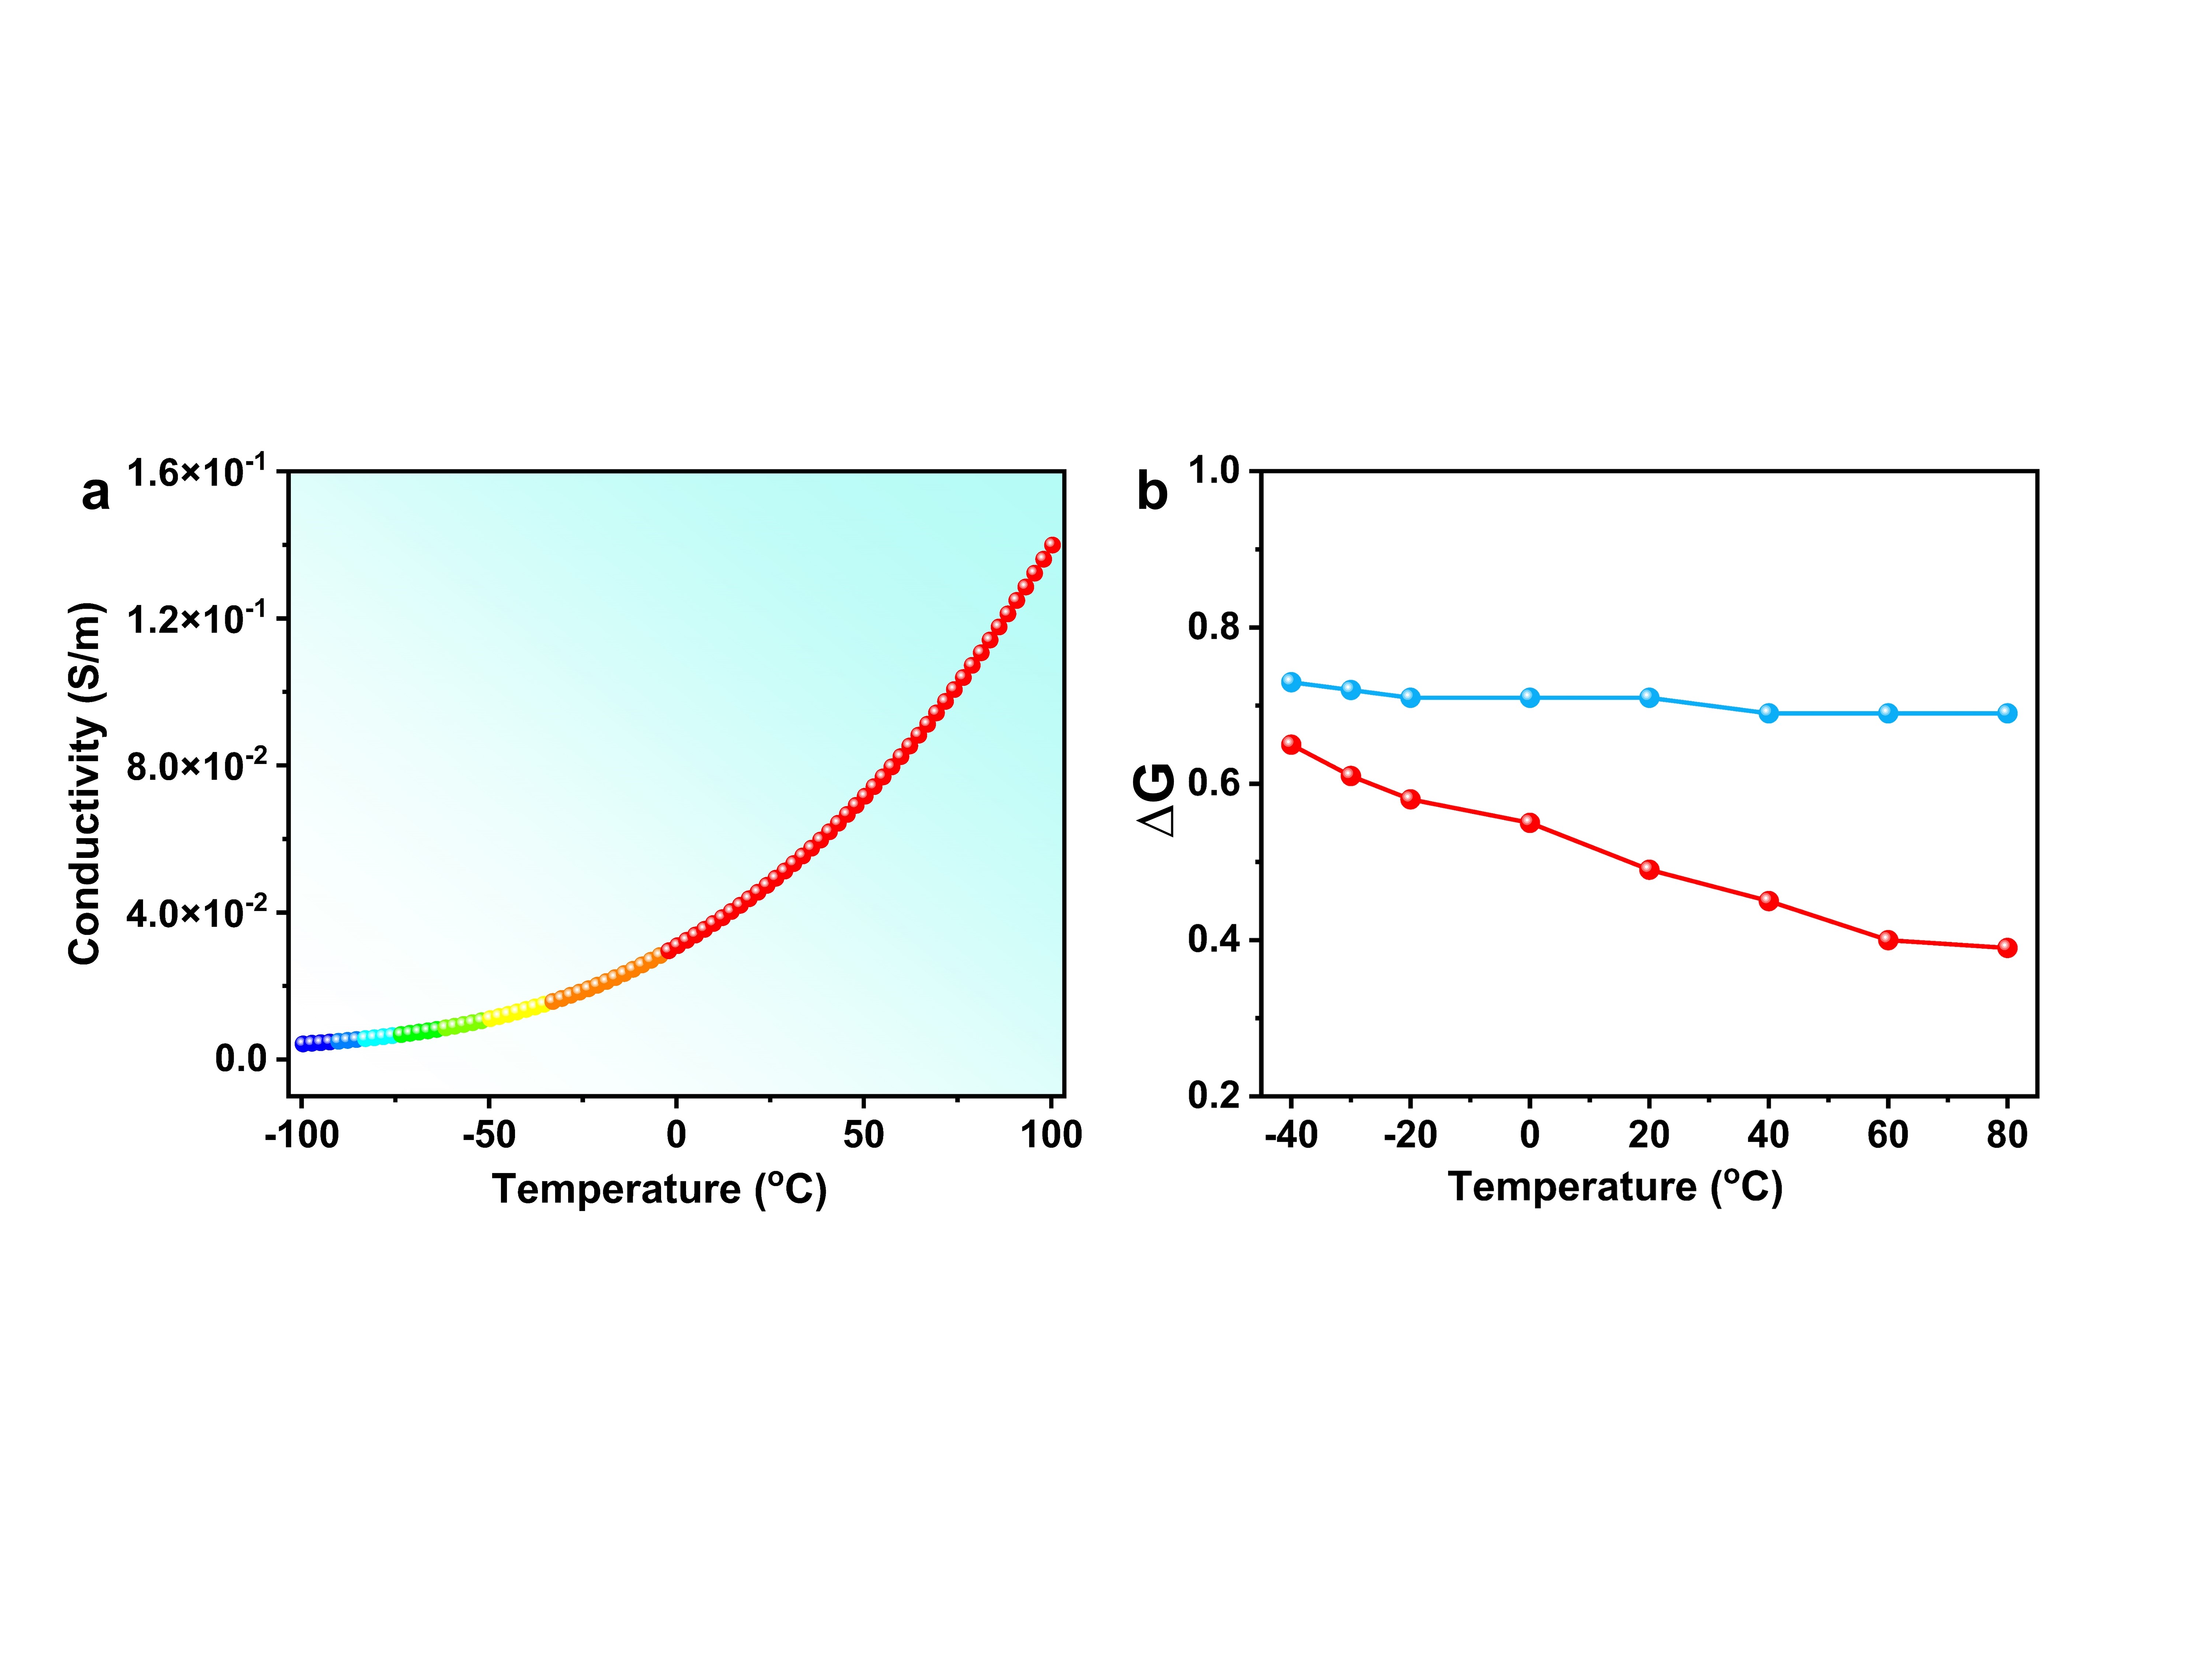
Figure S13. a) The electrical conductivity of pFeIIPc at different temperatures. b) ∆G of the rate-determining step for the formation of Li2C2O4 in the Li-CO2 battery with pFeIIPc at different temperatures.


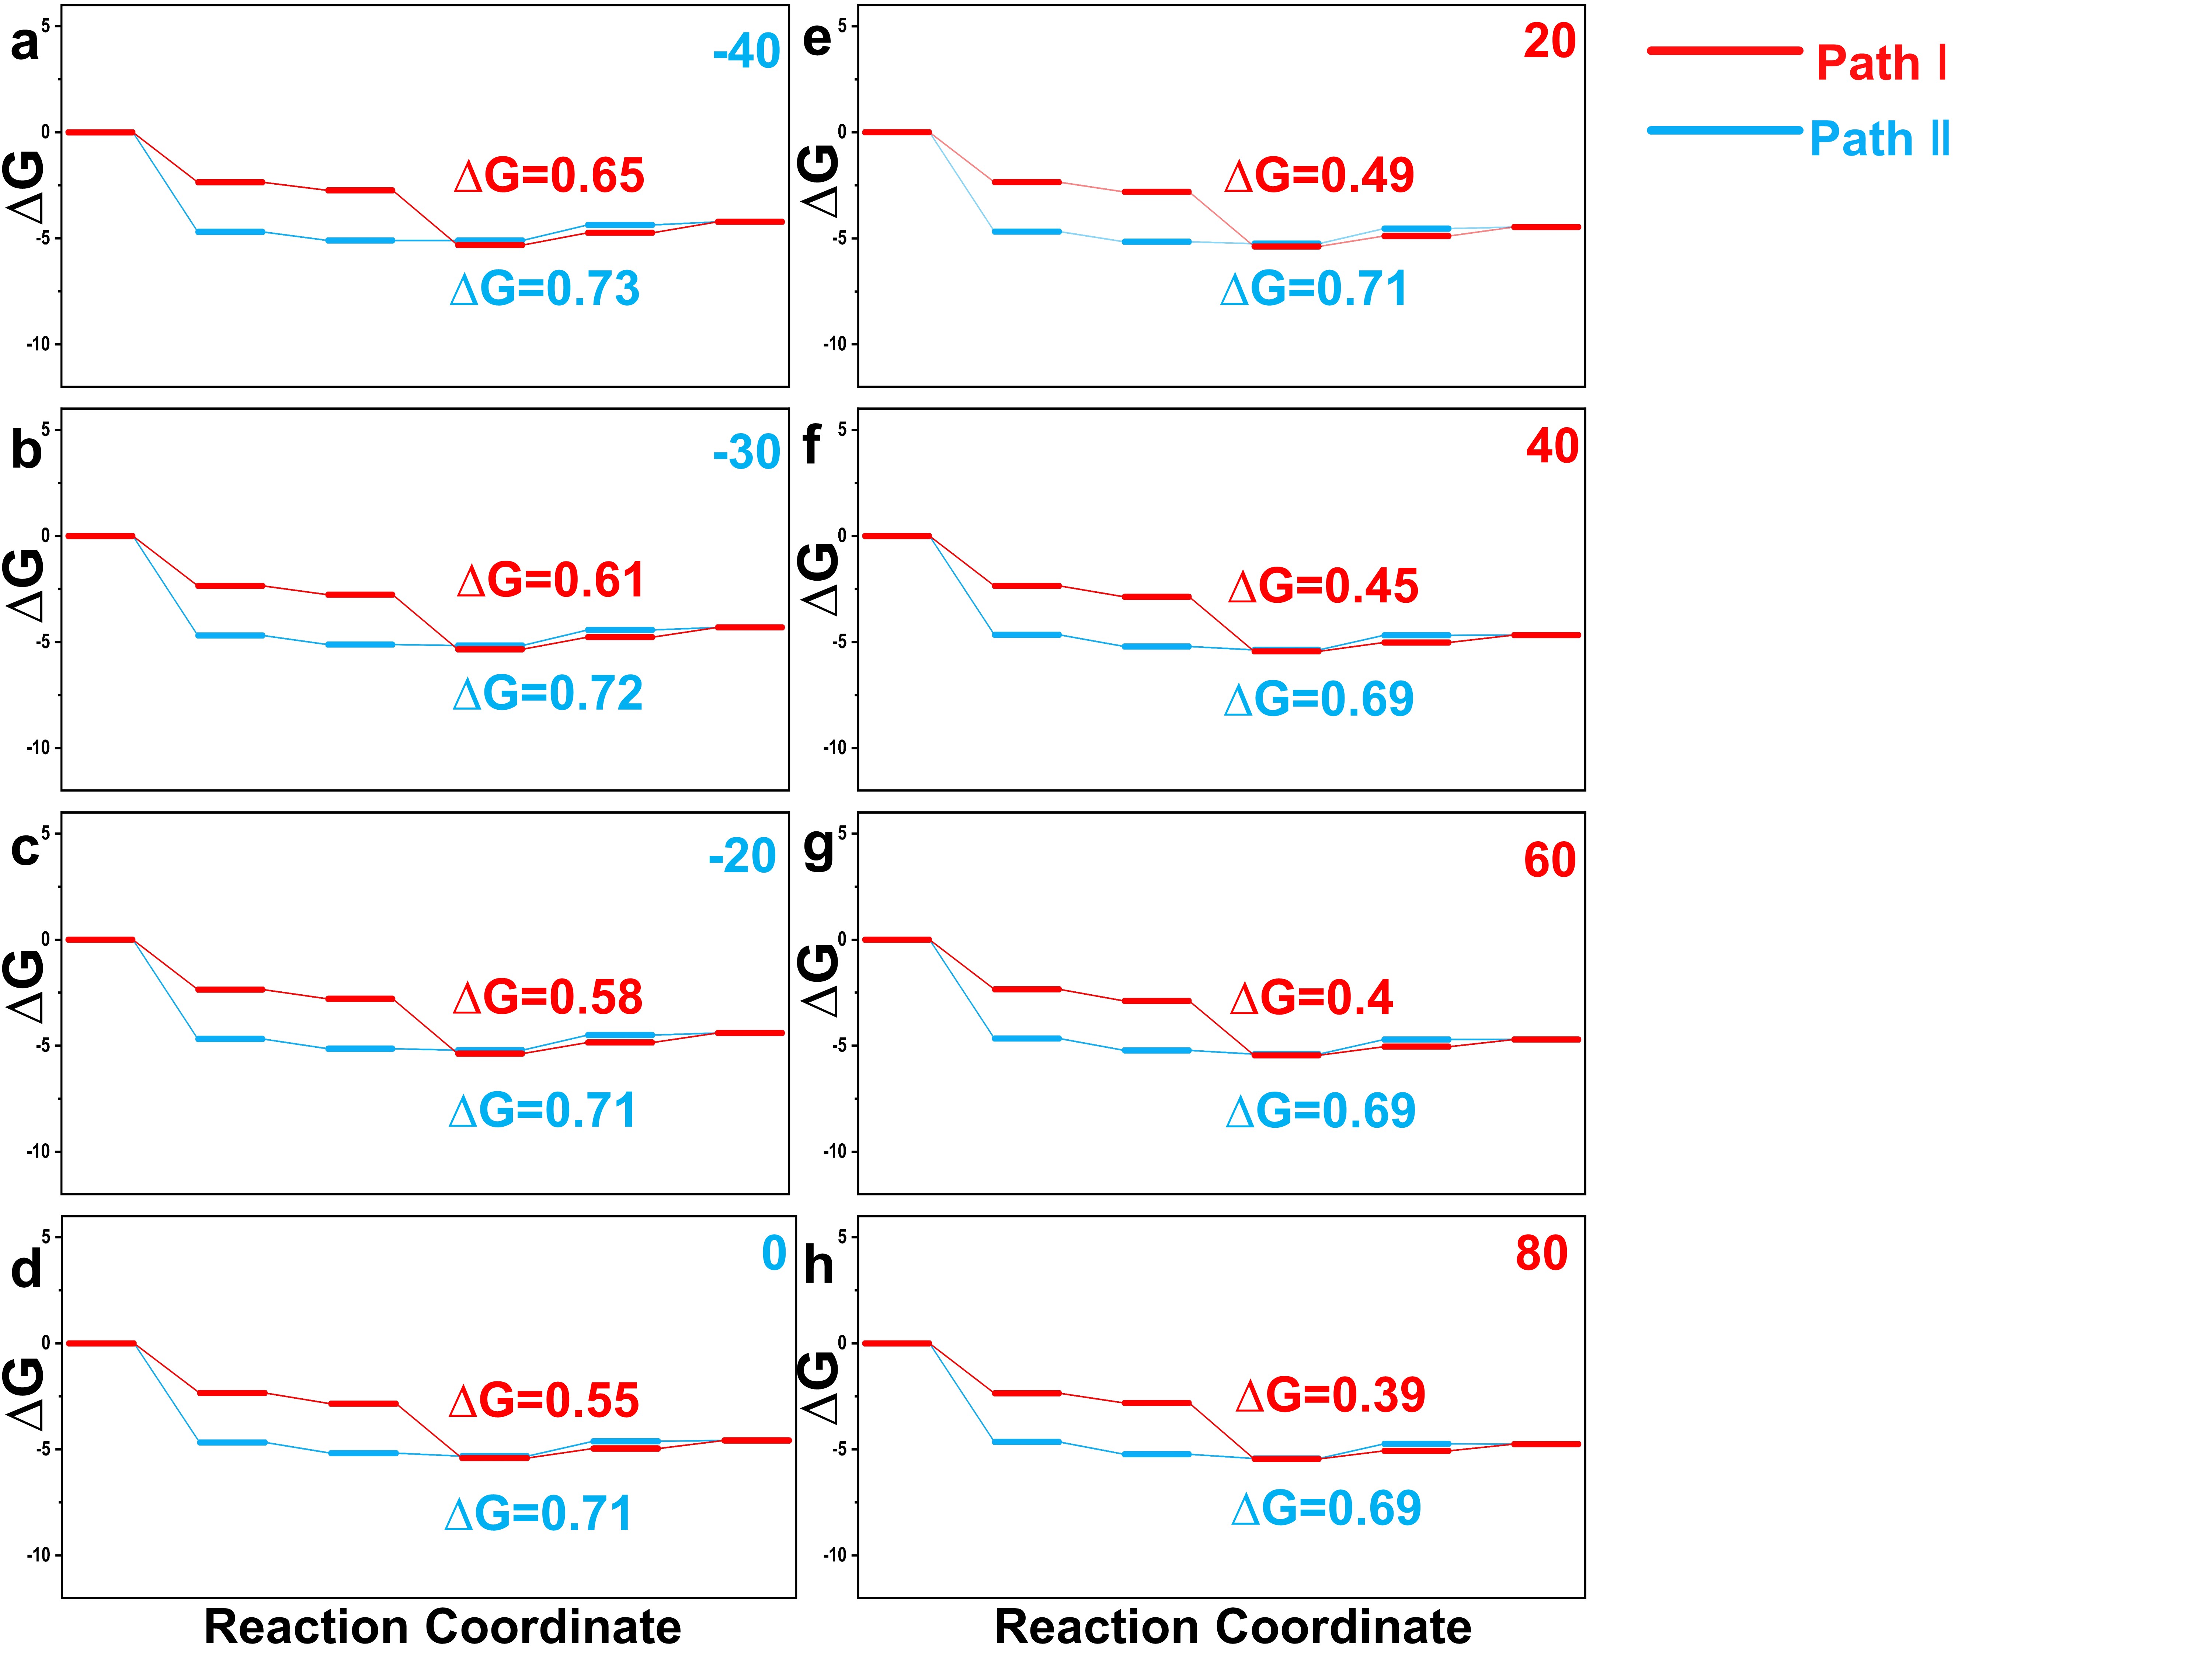


Figure S14. Free energy diagrams of different nucleation pathways of Li2C2O4 on C32H16N8Fe and C58H26N16Fe2 at a) -40 oC a) -30 oC a)-20 oC a) 0 oC a)20 oC a) 40 oC a) 60 oC a)80 oC.


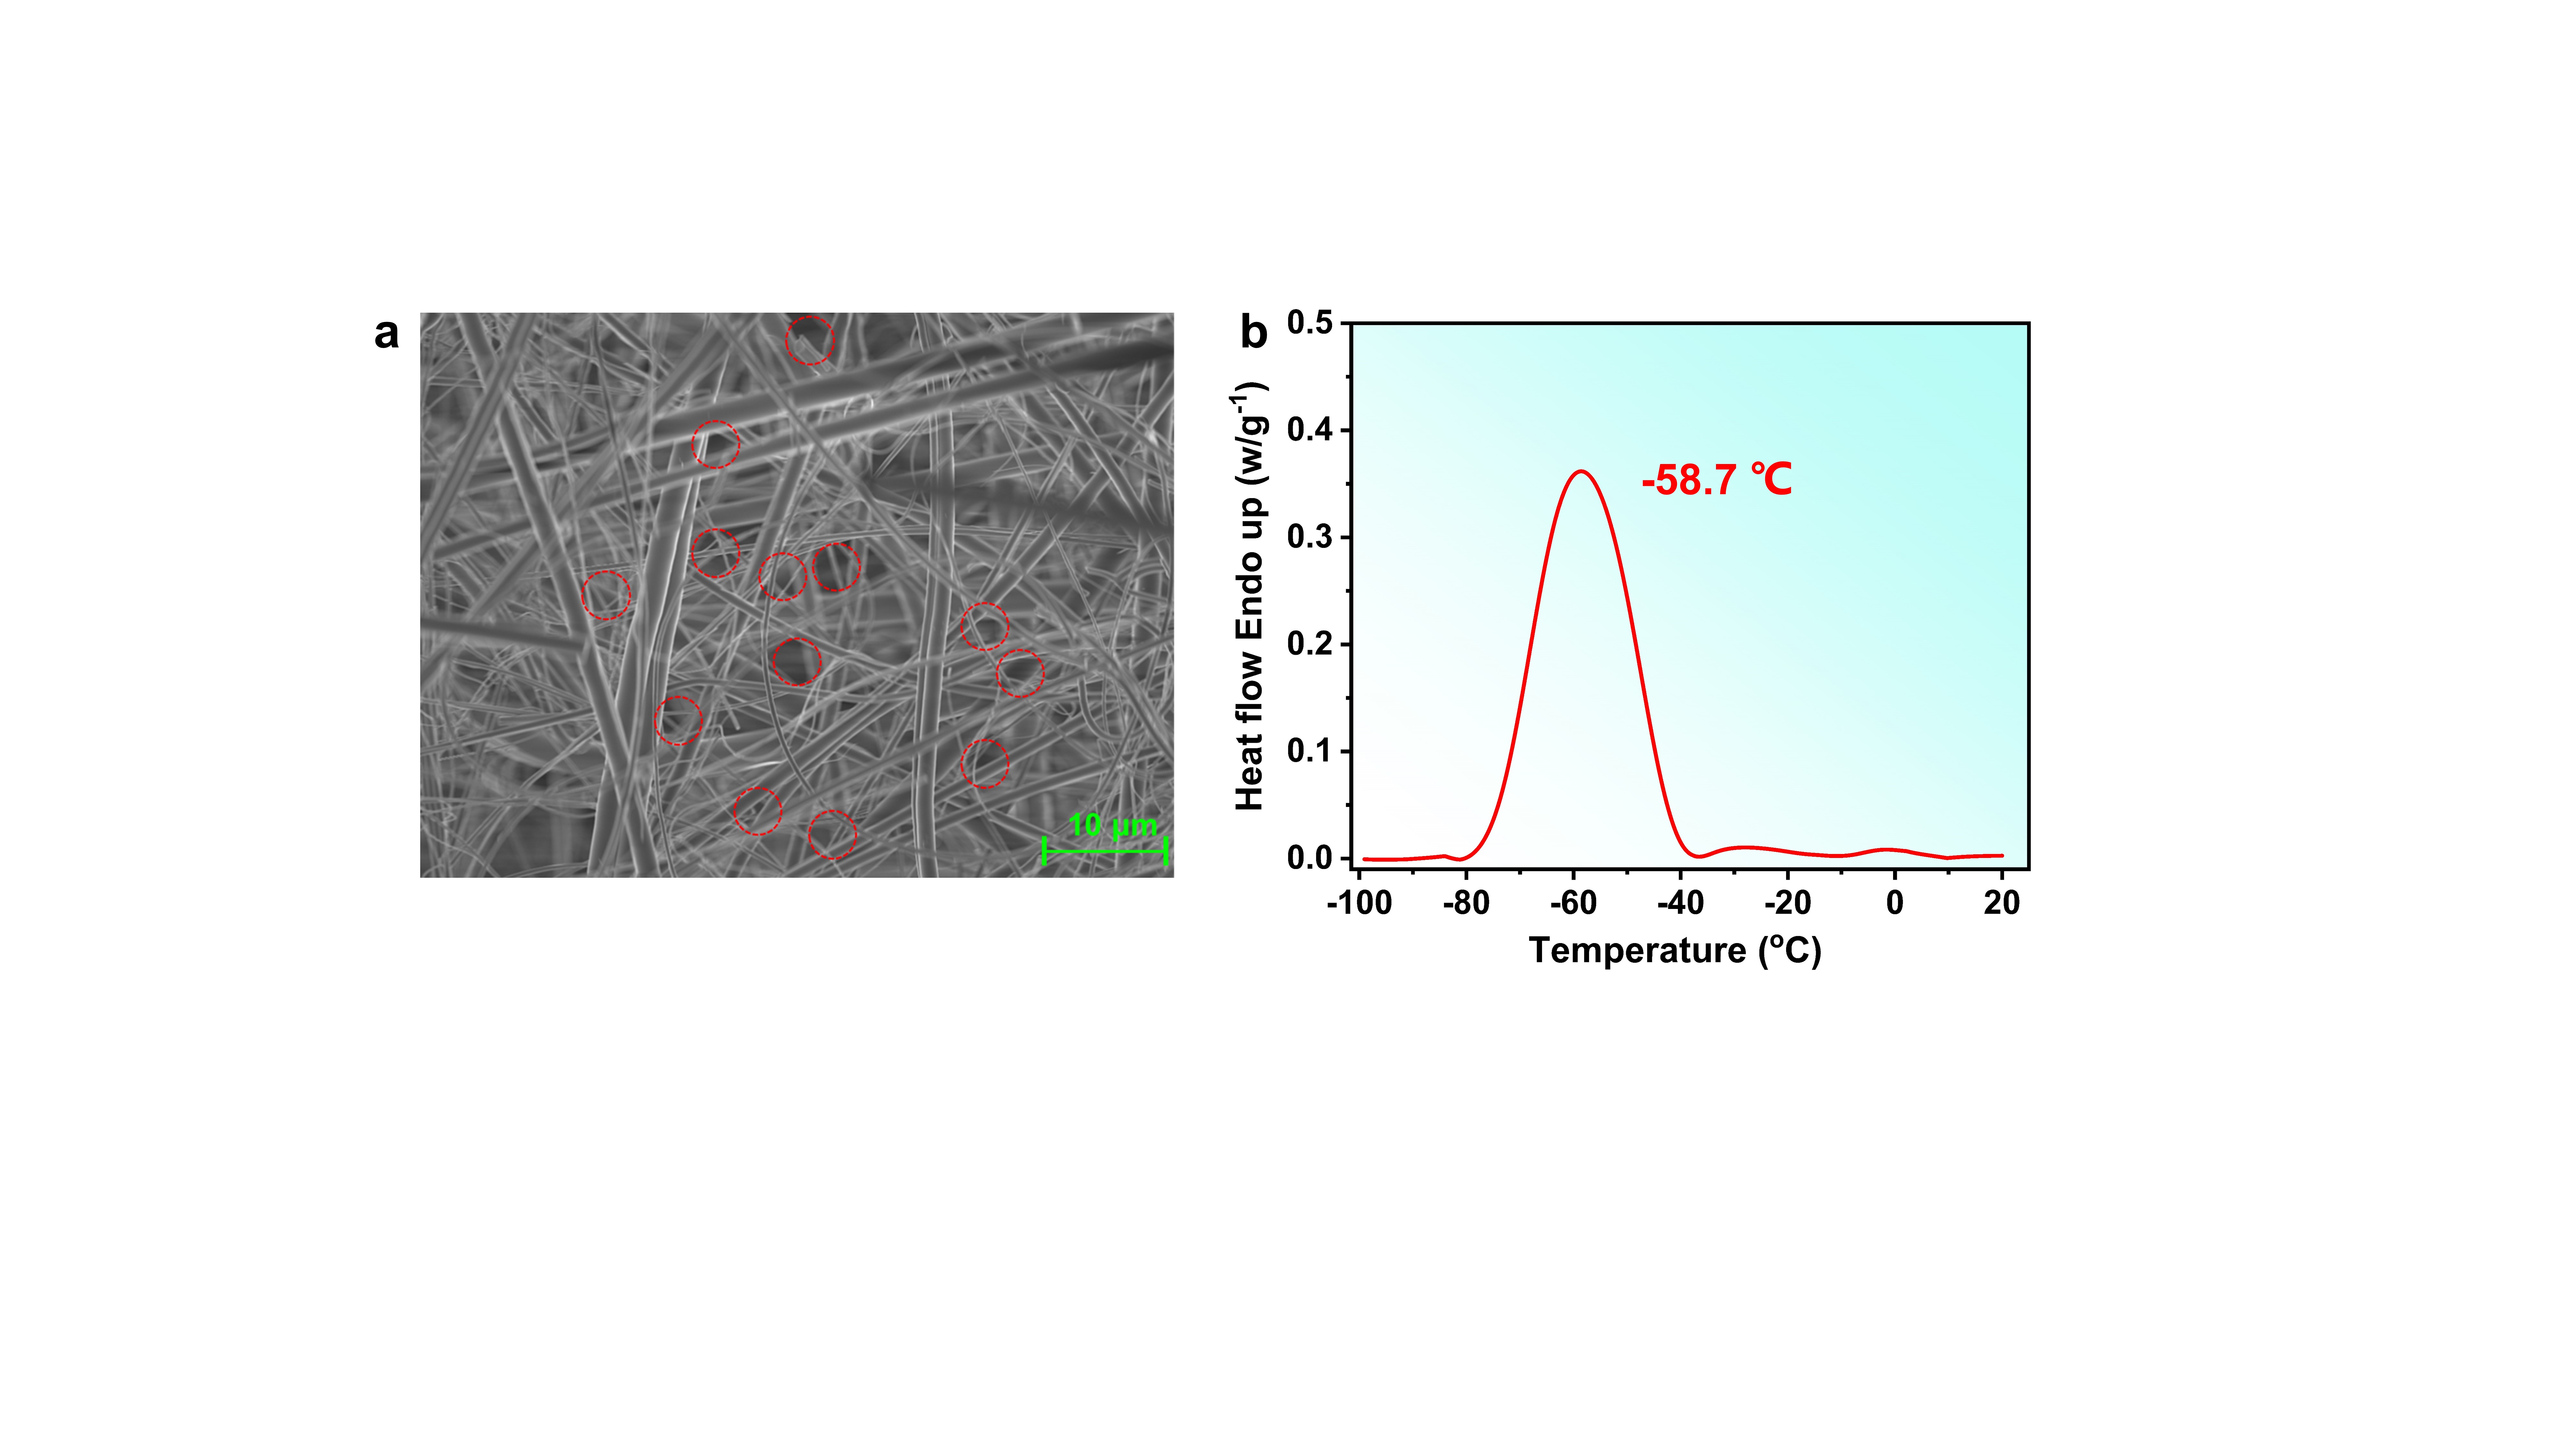
Figure S15. a) SEM image of the separator. b) The DSC curve of 1.0 M LiTFSI/TEGDME electrolyte in separator.


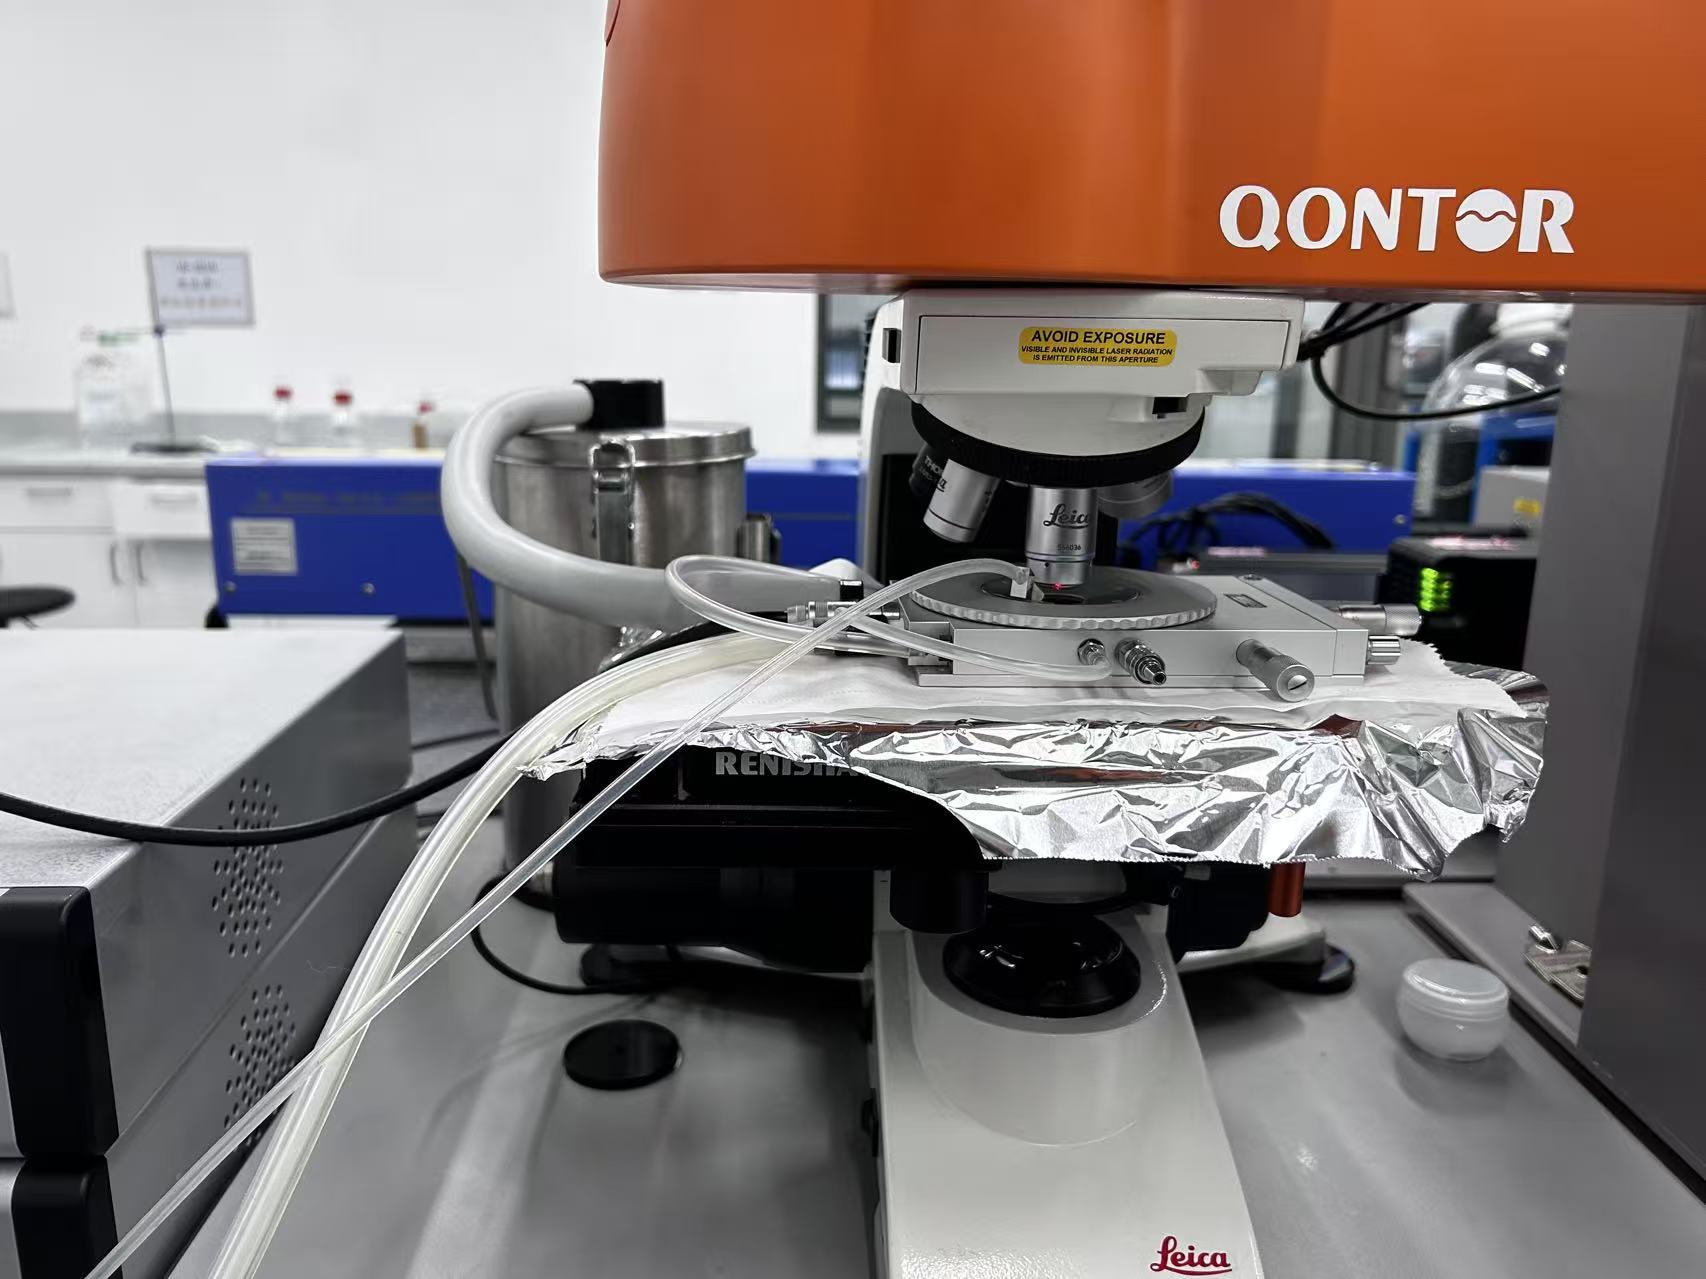


**Figure S16.** Optical image of the variable-temperature in-suit Raman testing process.


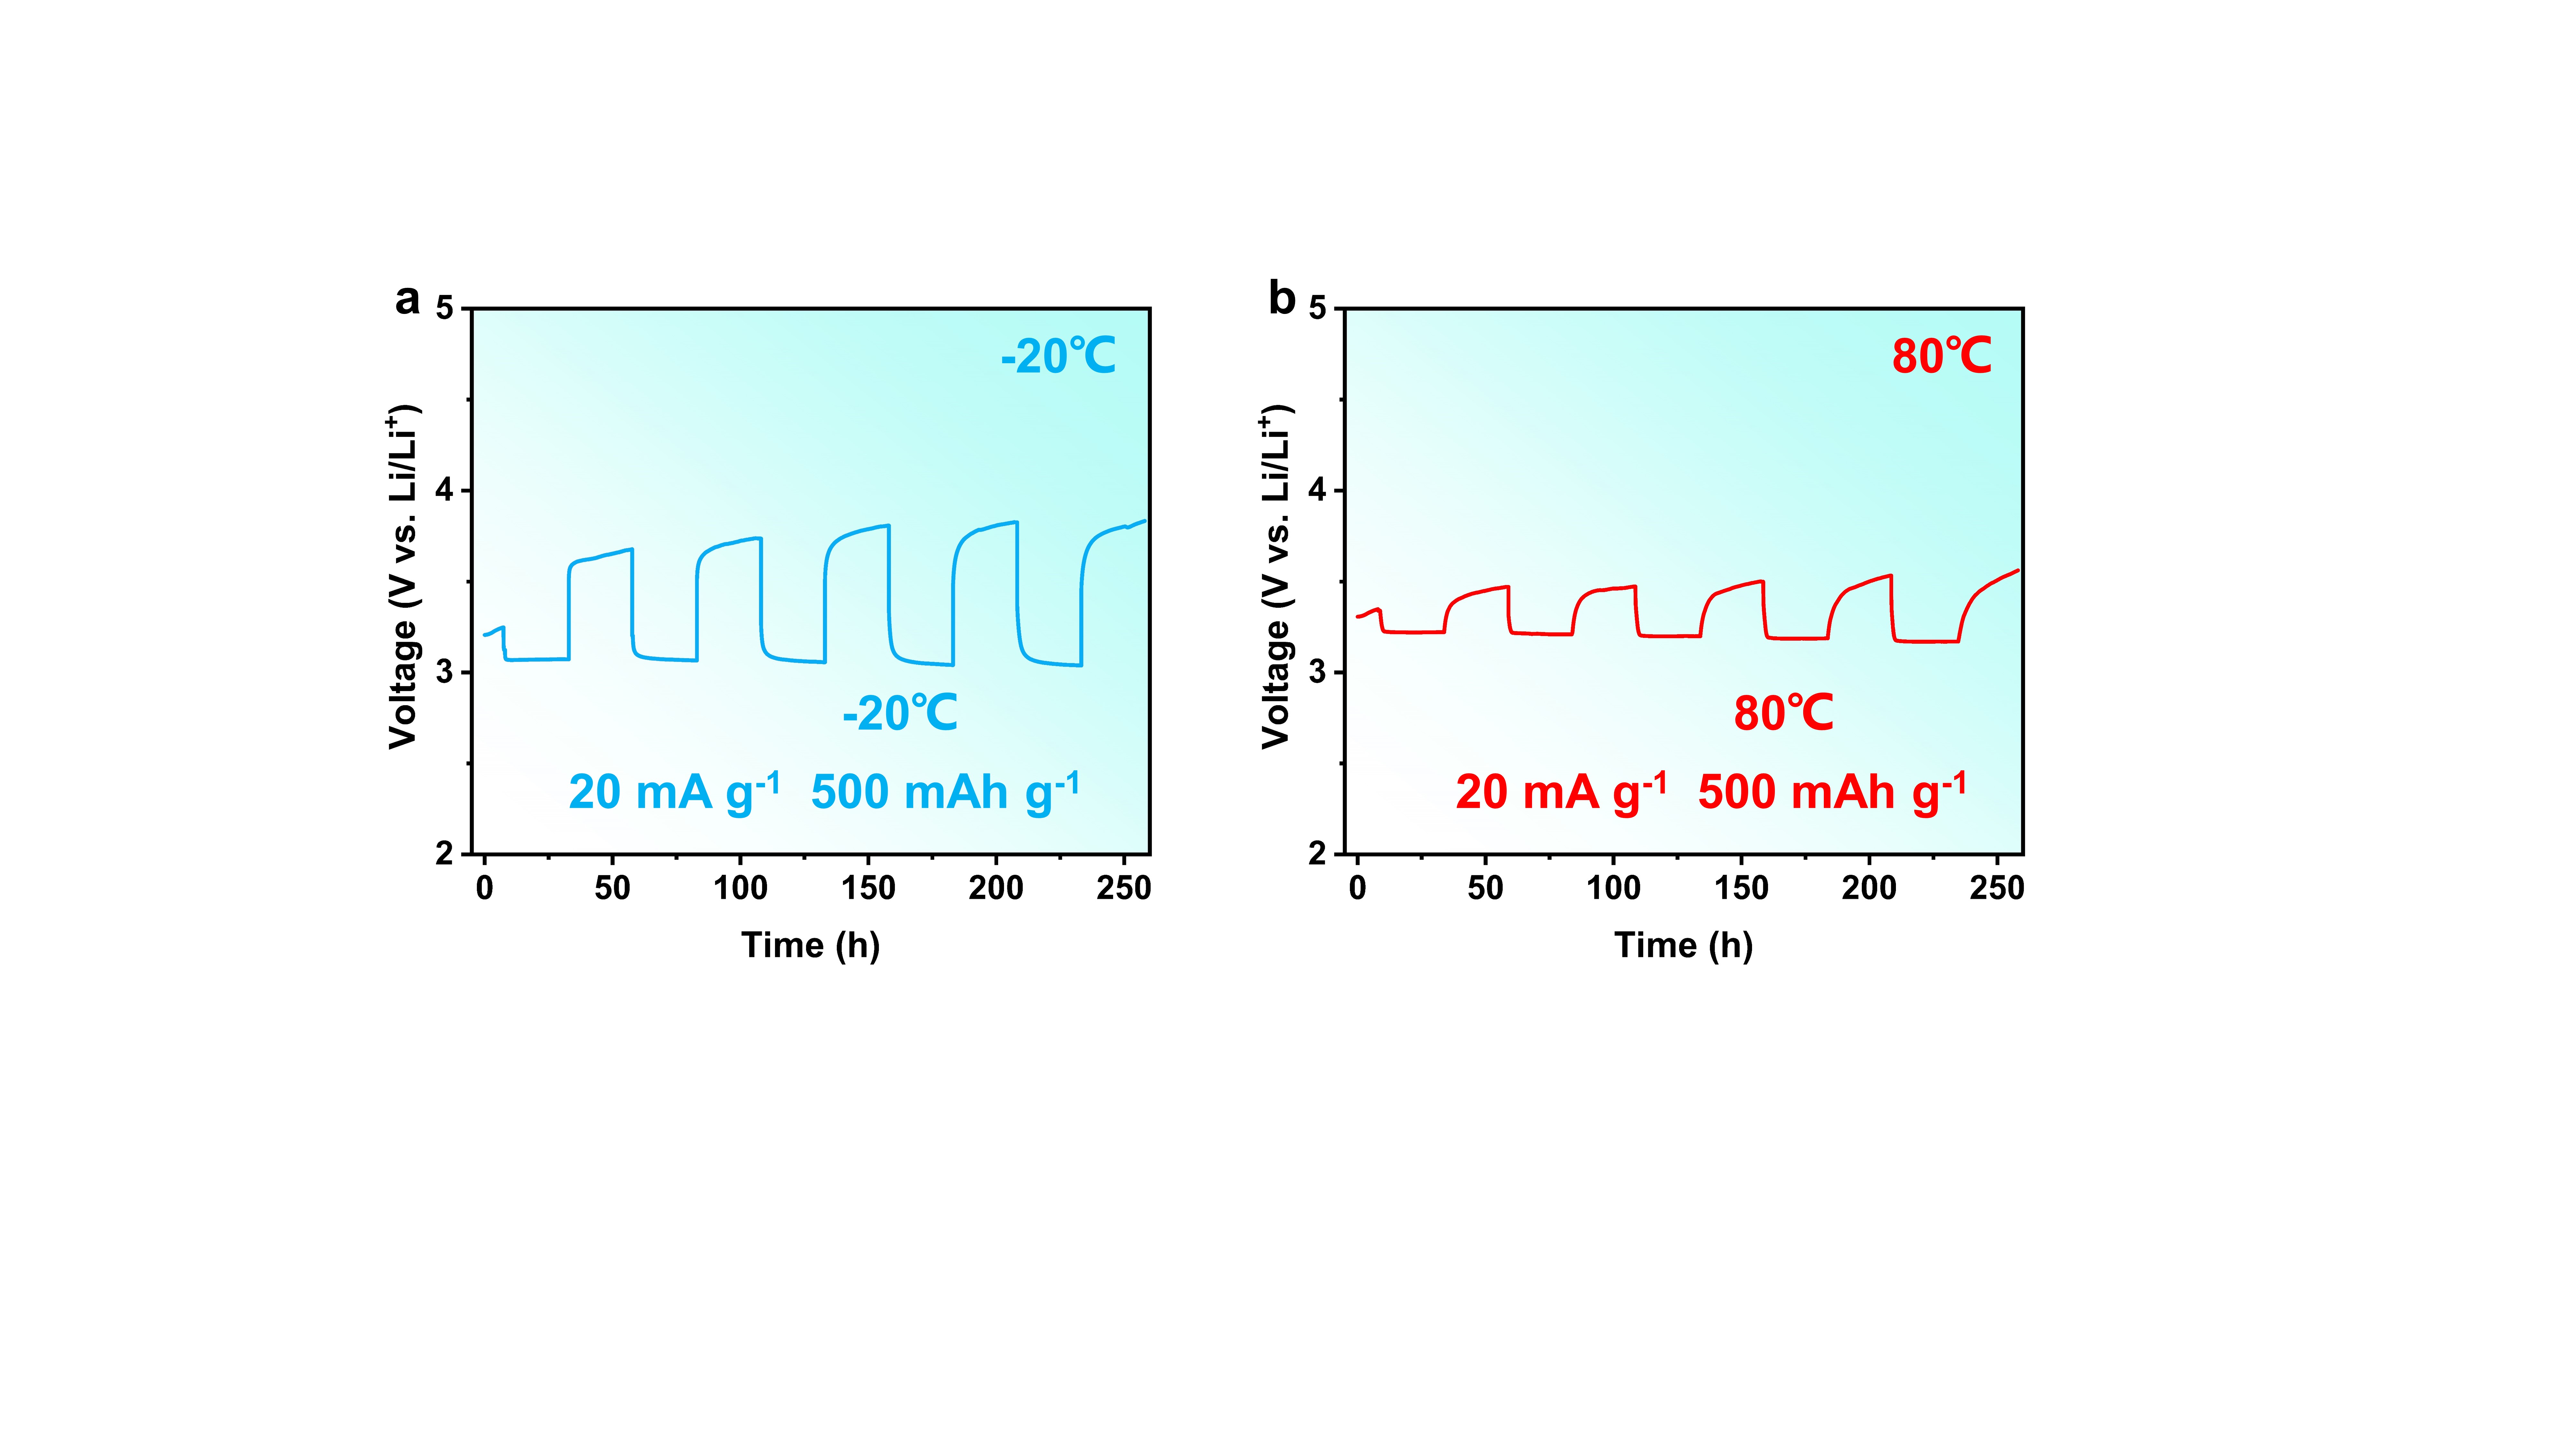


Figure S17. a) The cycling curve of the Li-CO2 battery with pFe‖Pc and a current density of 20 mA g-1 at a) -20 oC and b) 80 oC.


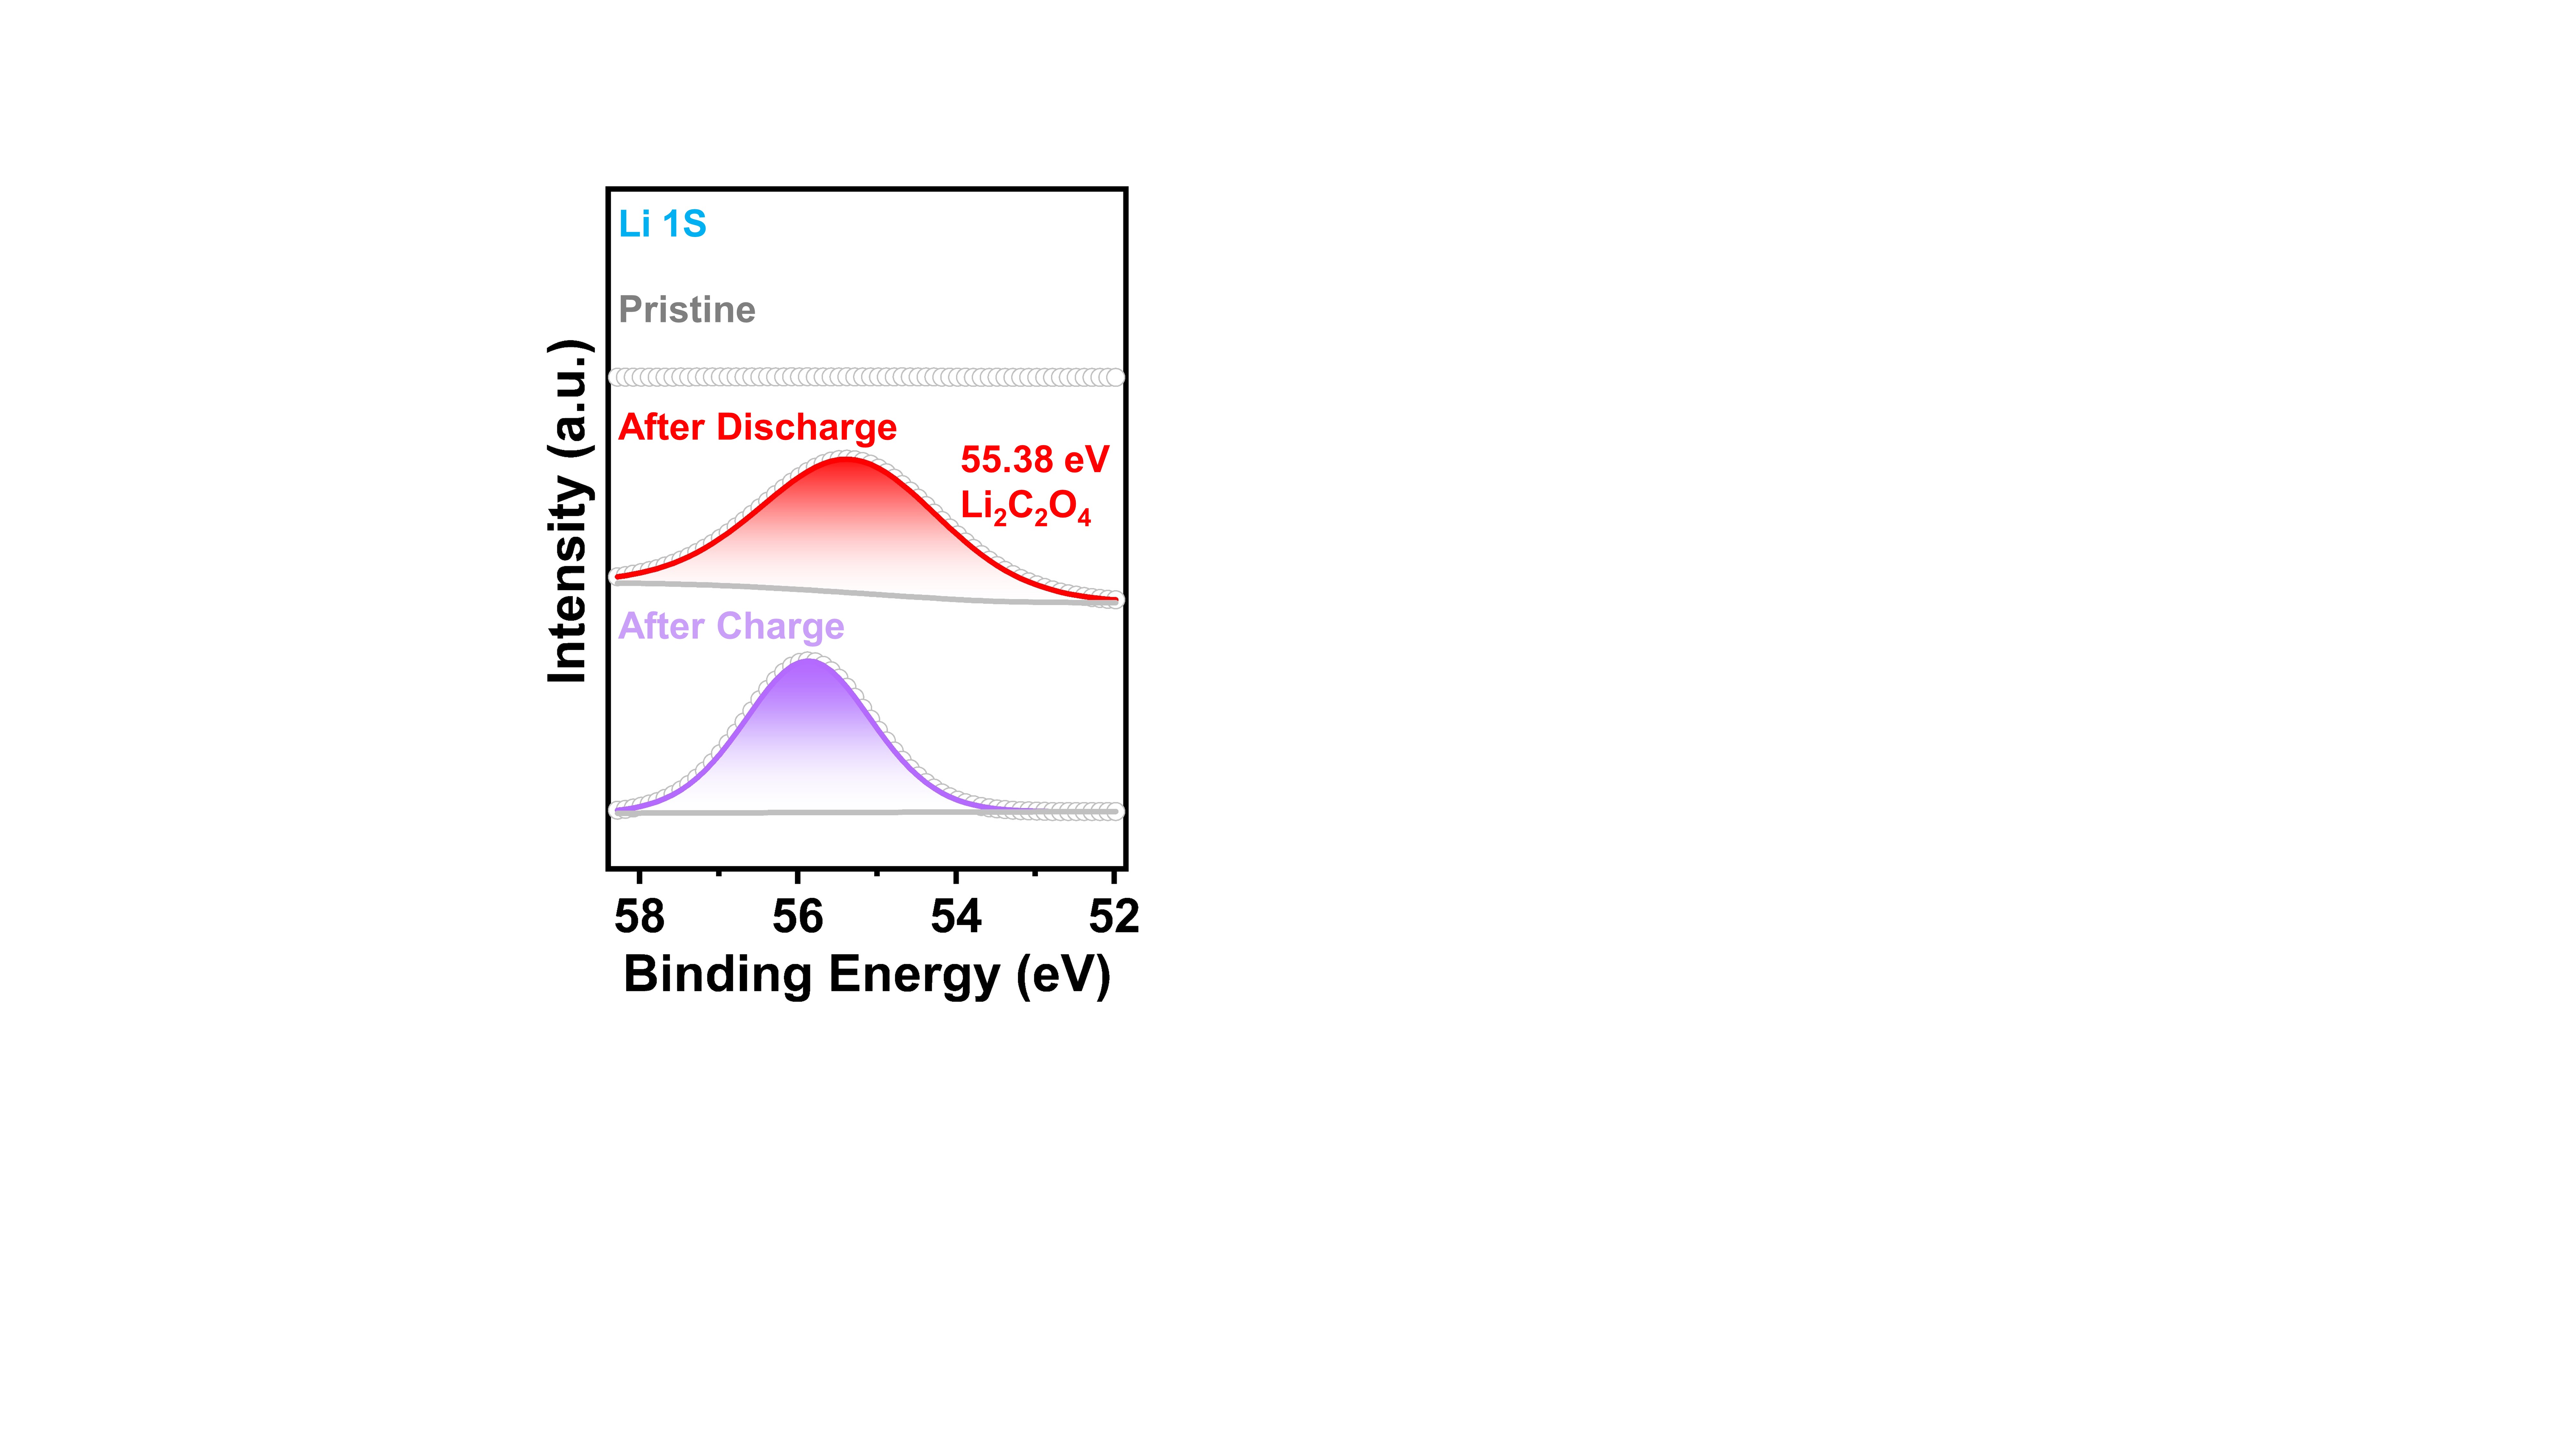


**Figure S18.** XPS spectrum of Li 1s at pristine, after discharge and after charge.


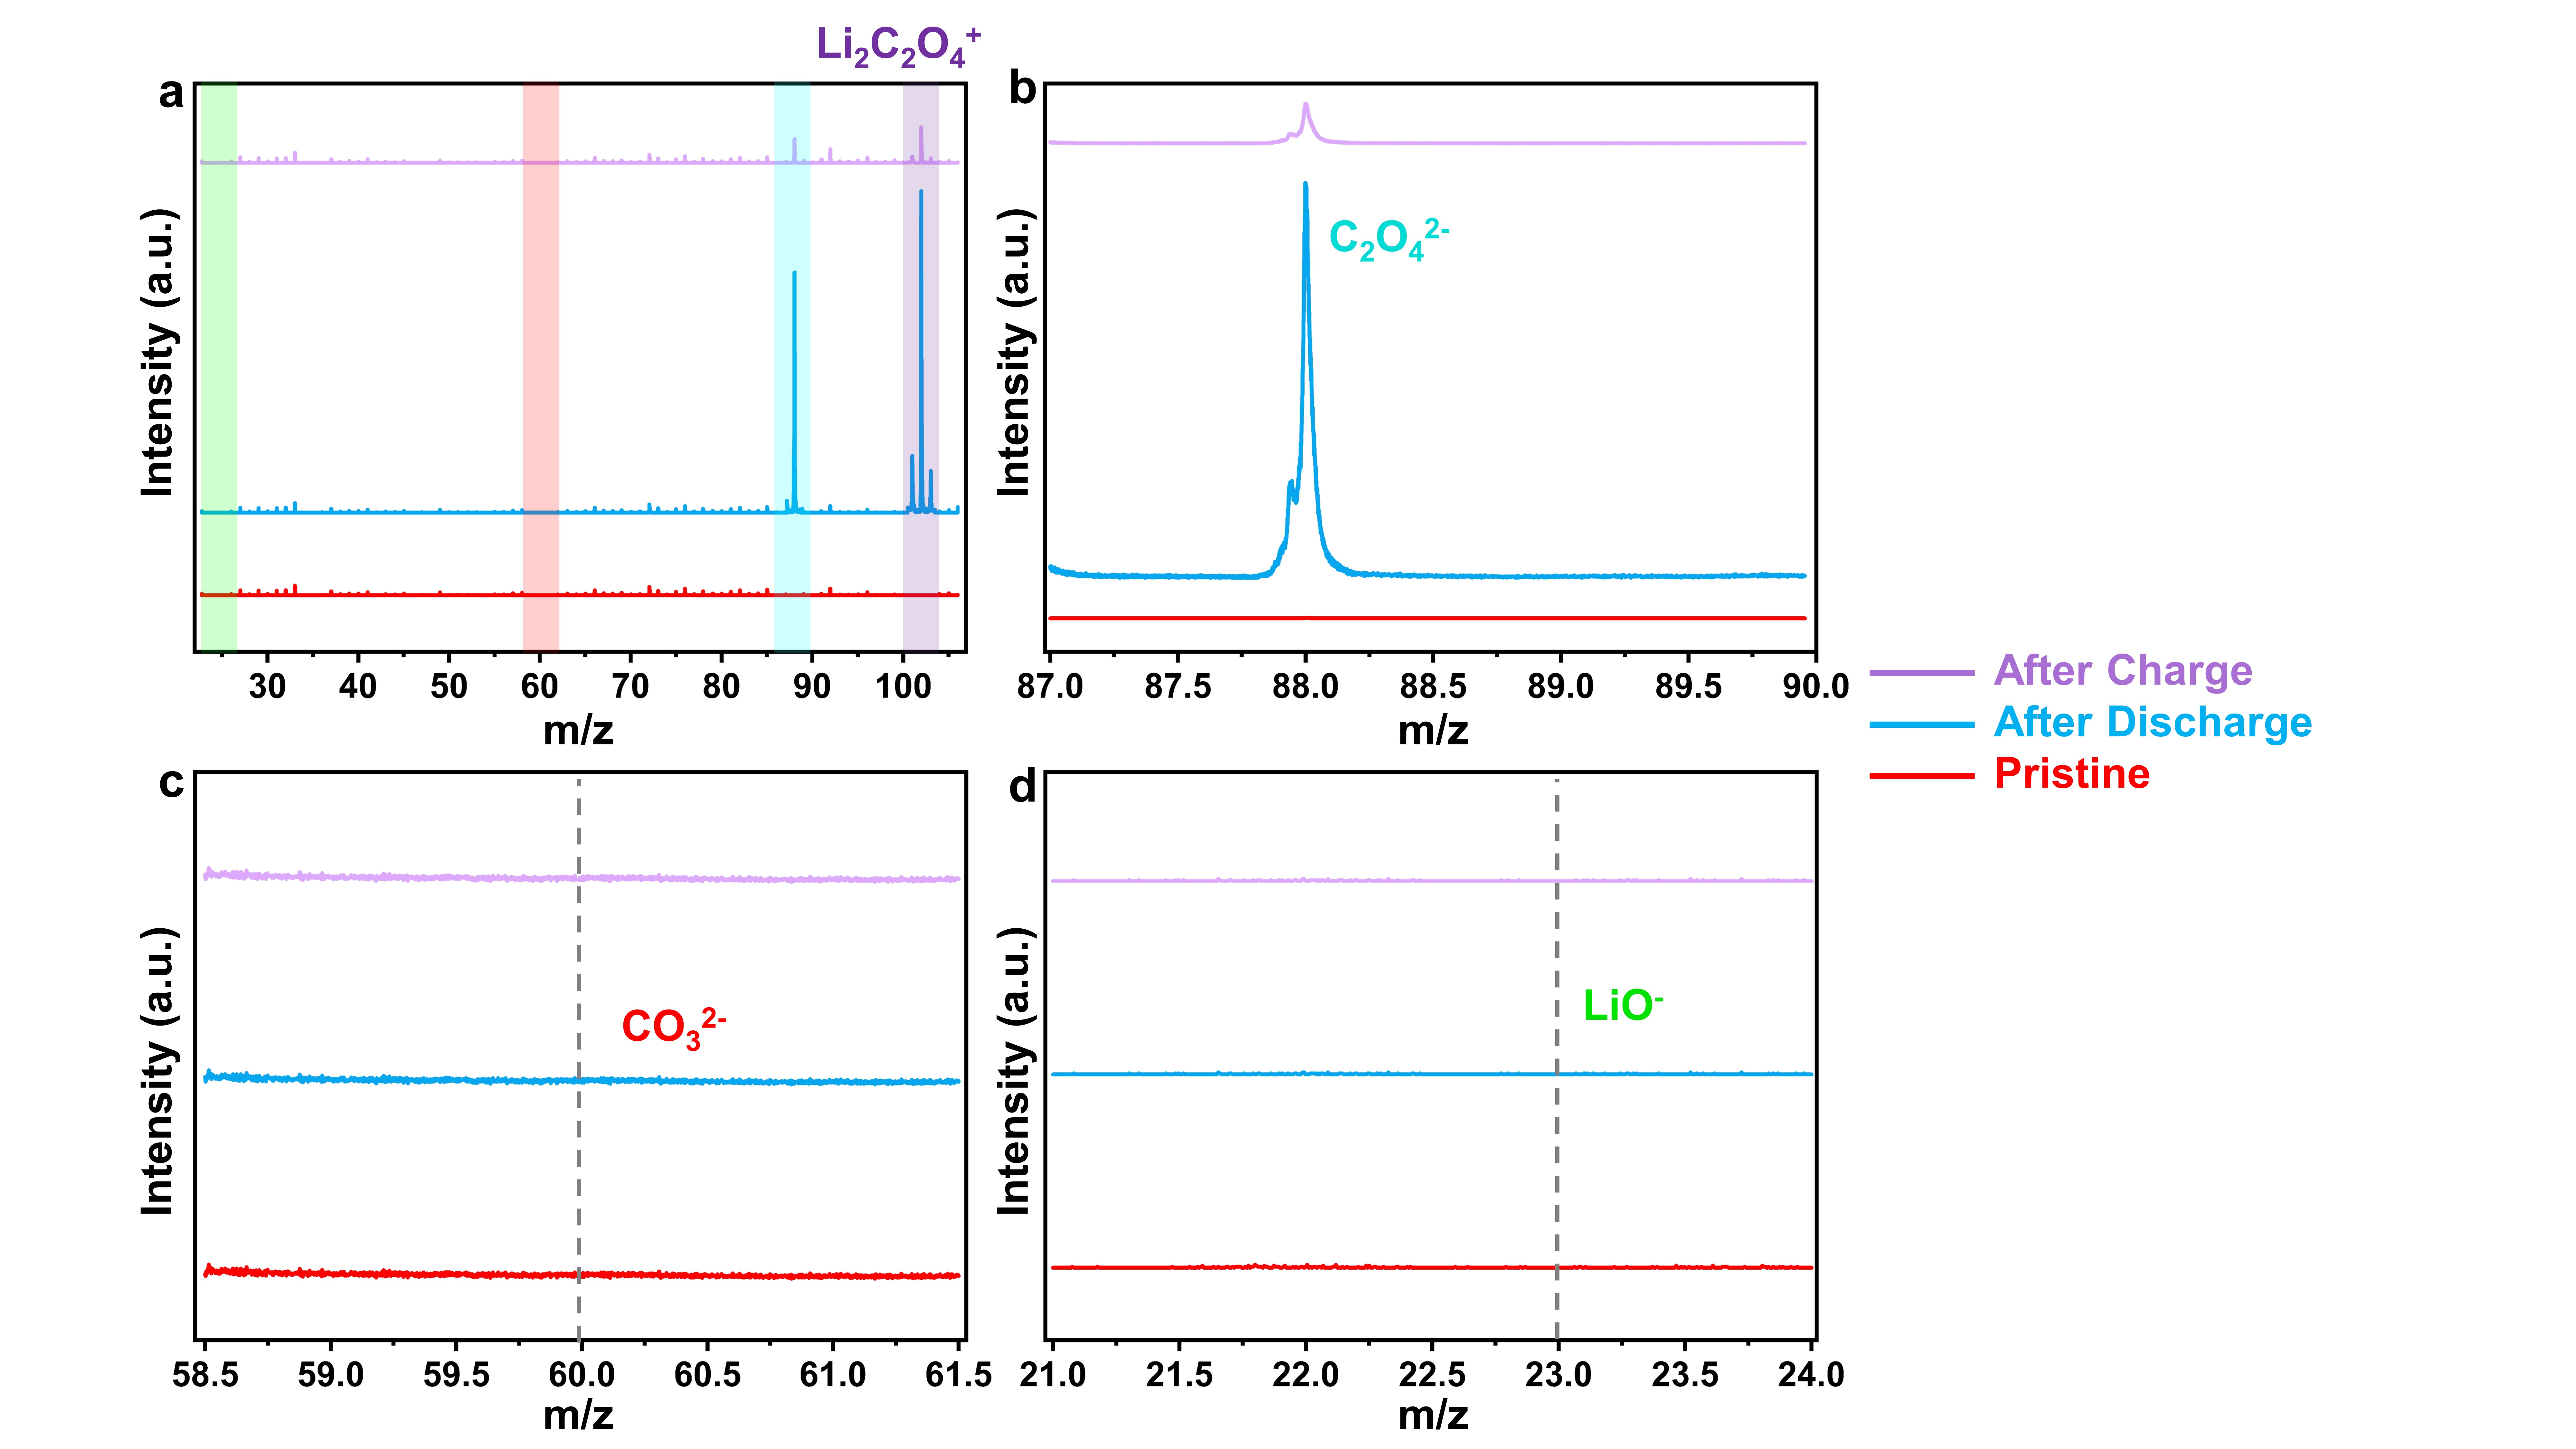


**Figure S19.** a) m/z of 20-110. b) m/z of 87-90. c) m/z of 58.5-61.5. d) m/z of 21-24.


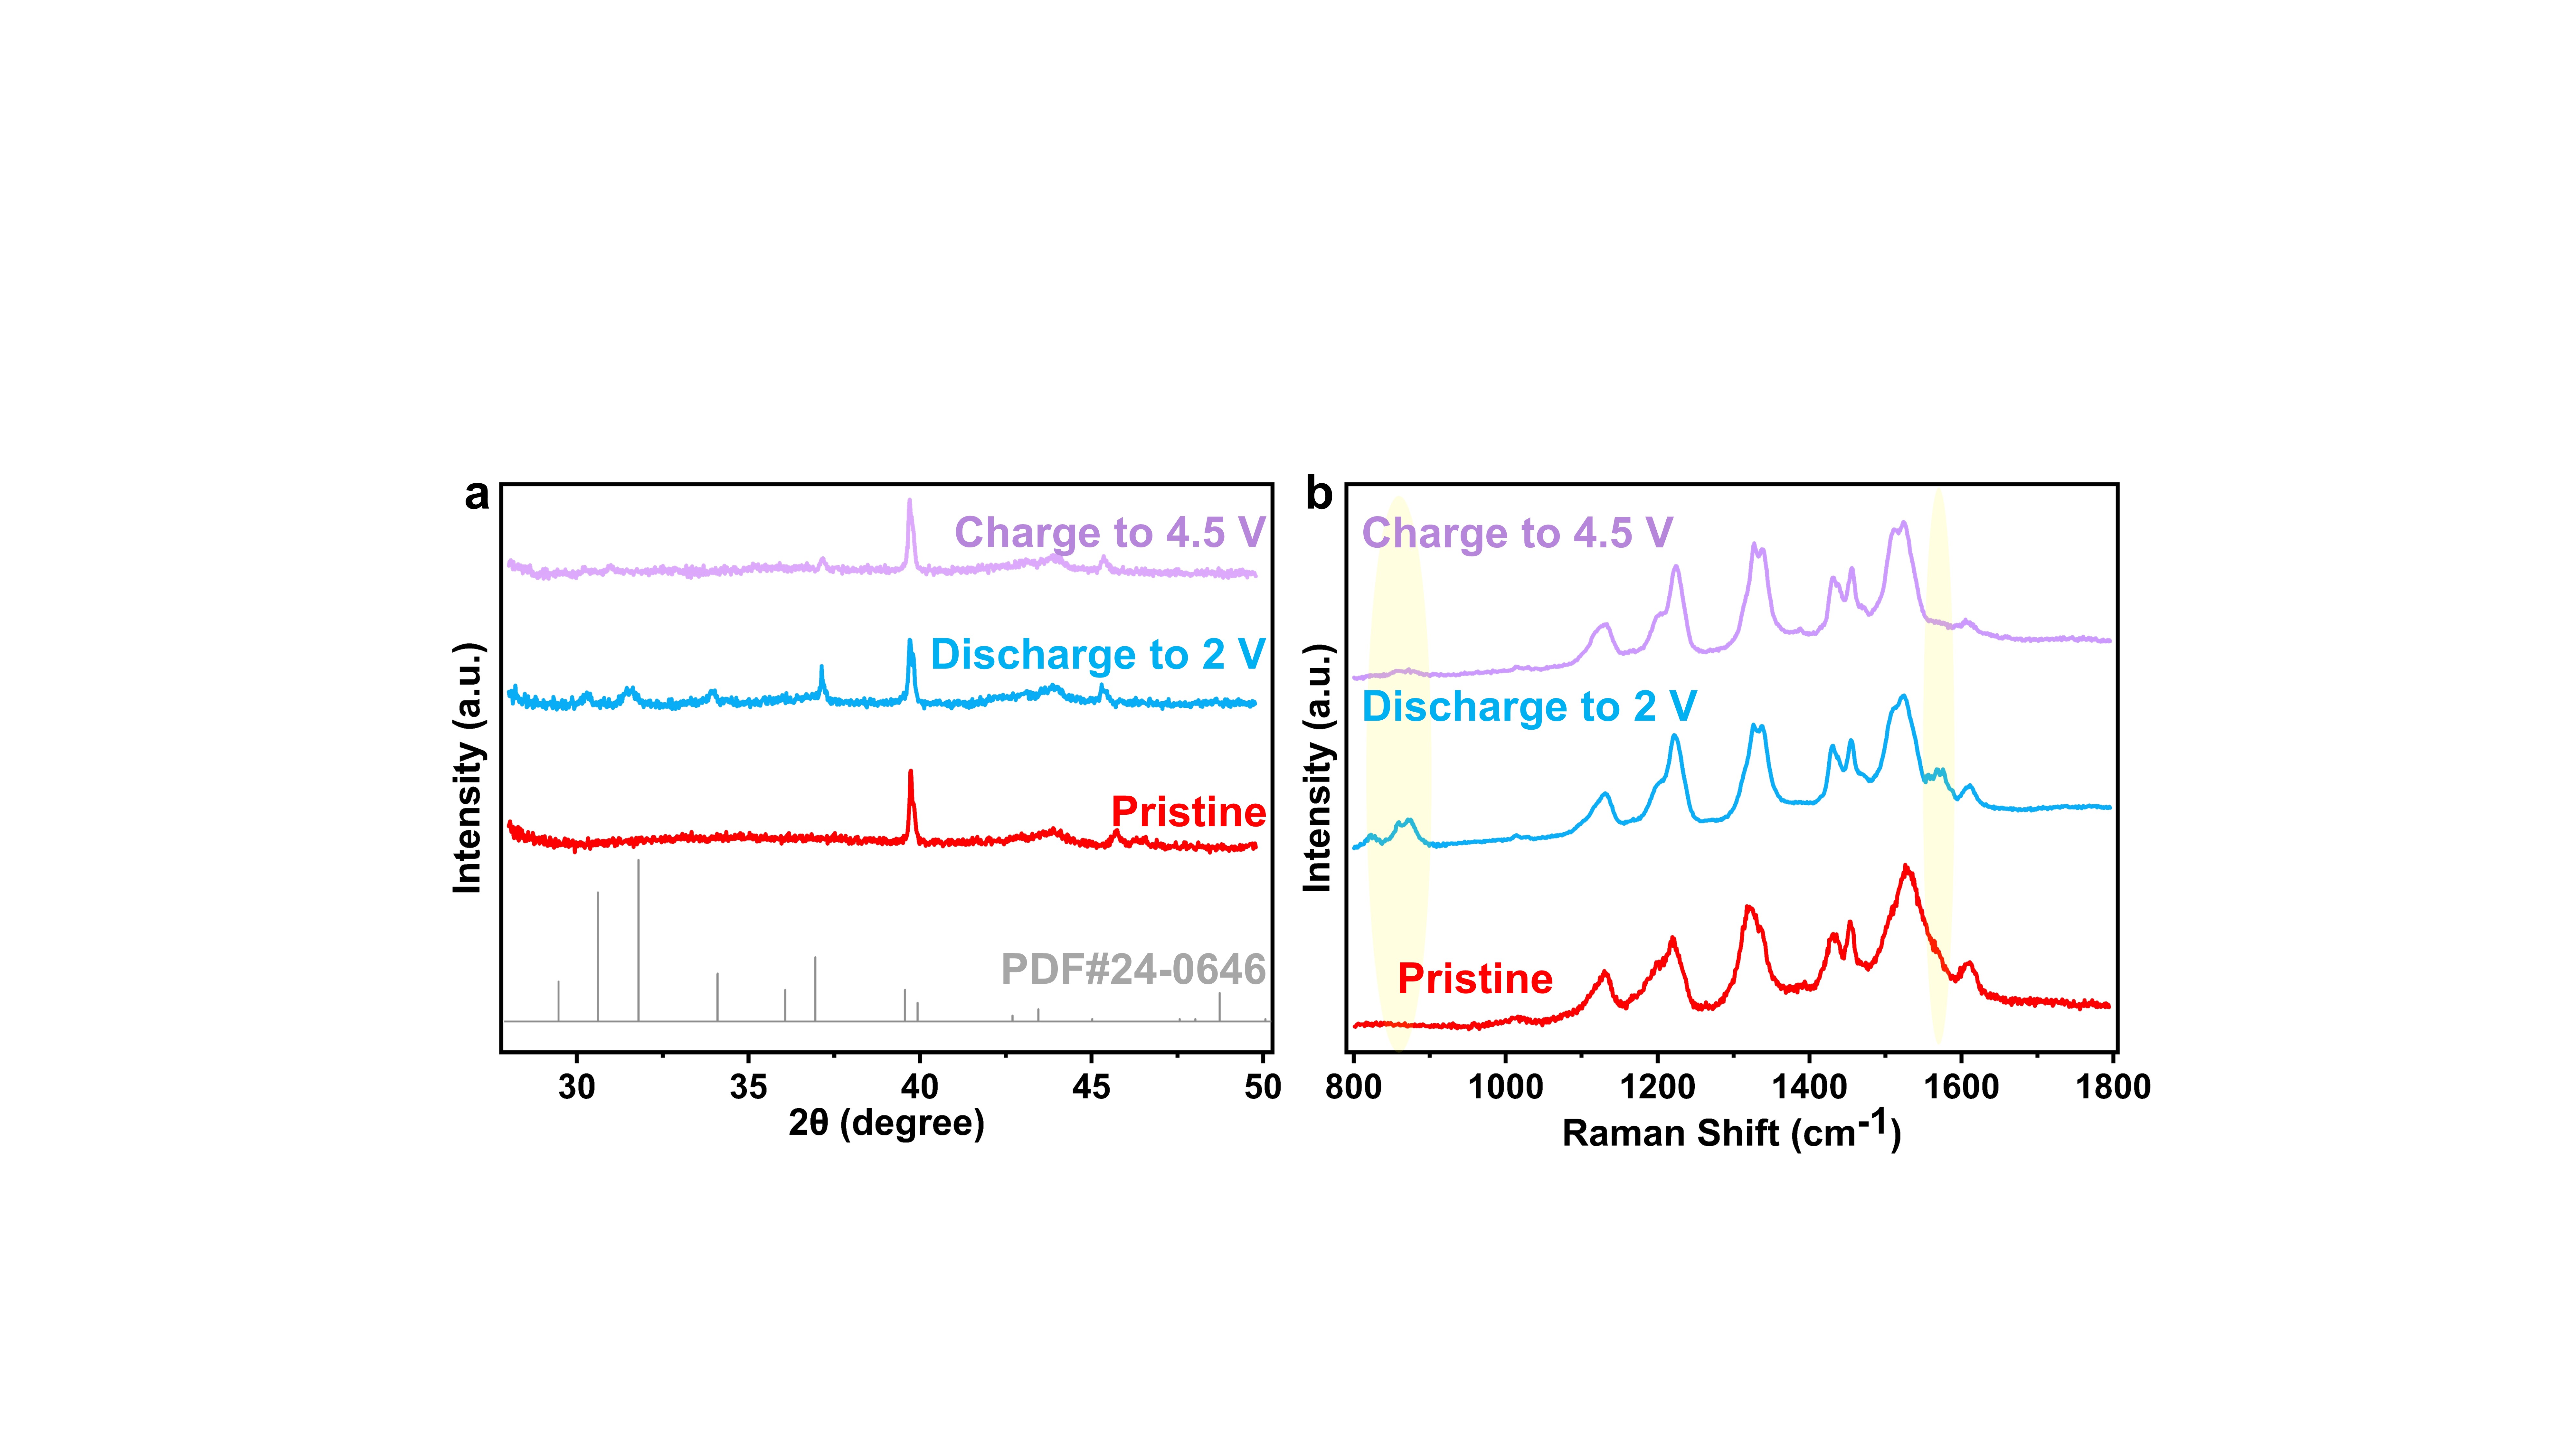


**Figure S20.** a) XRD pattern b) Raman spectrum of Li-CO2 battery with pFeIIPc at pristine, after discharge to 2 V and charge to 4.5 V.


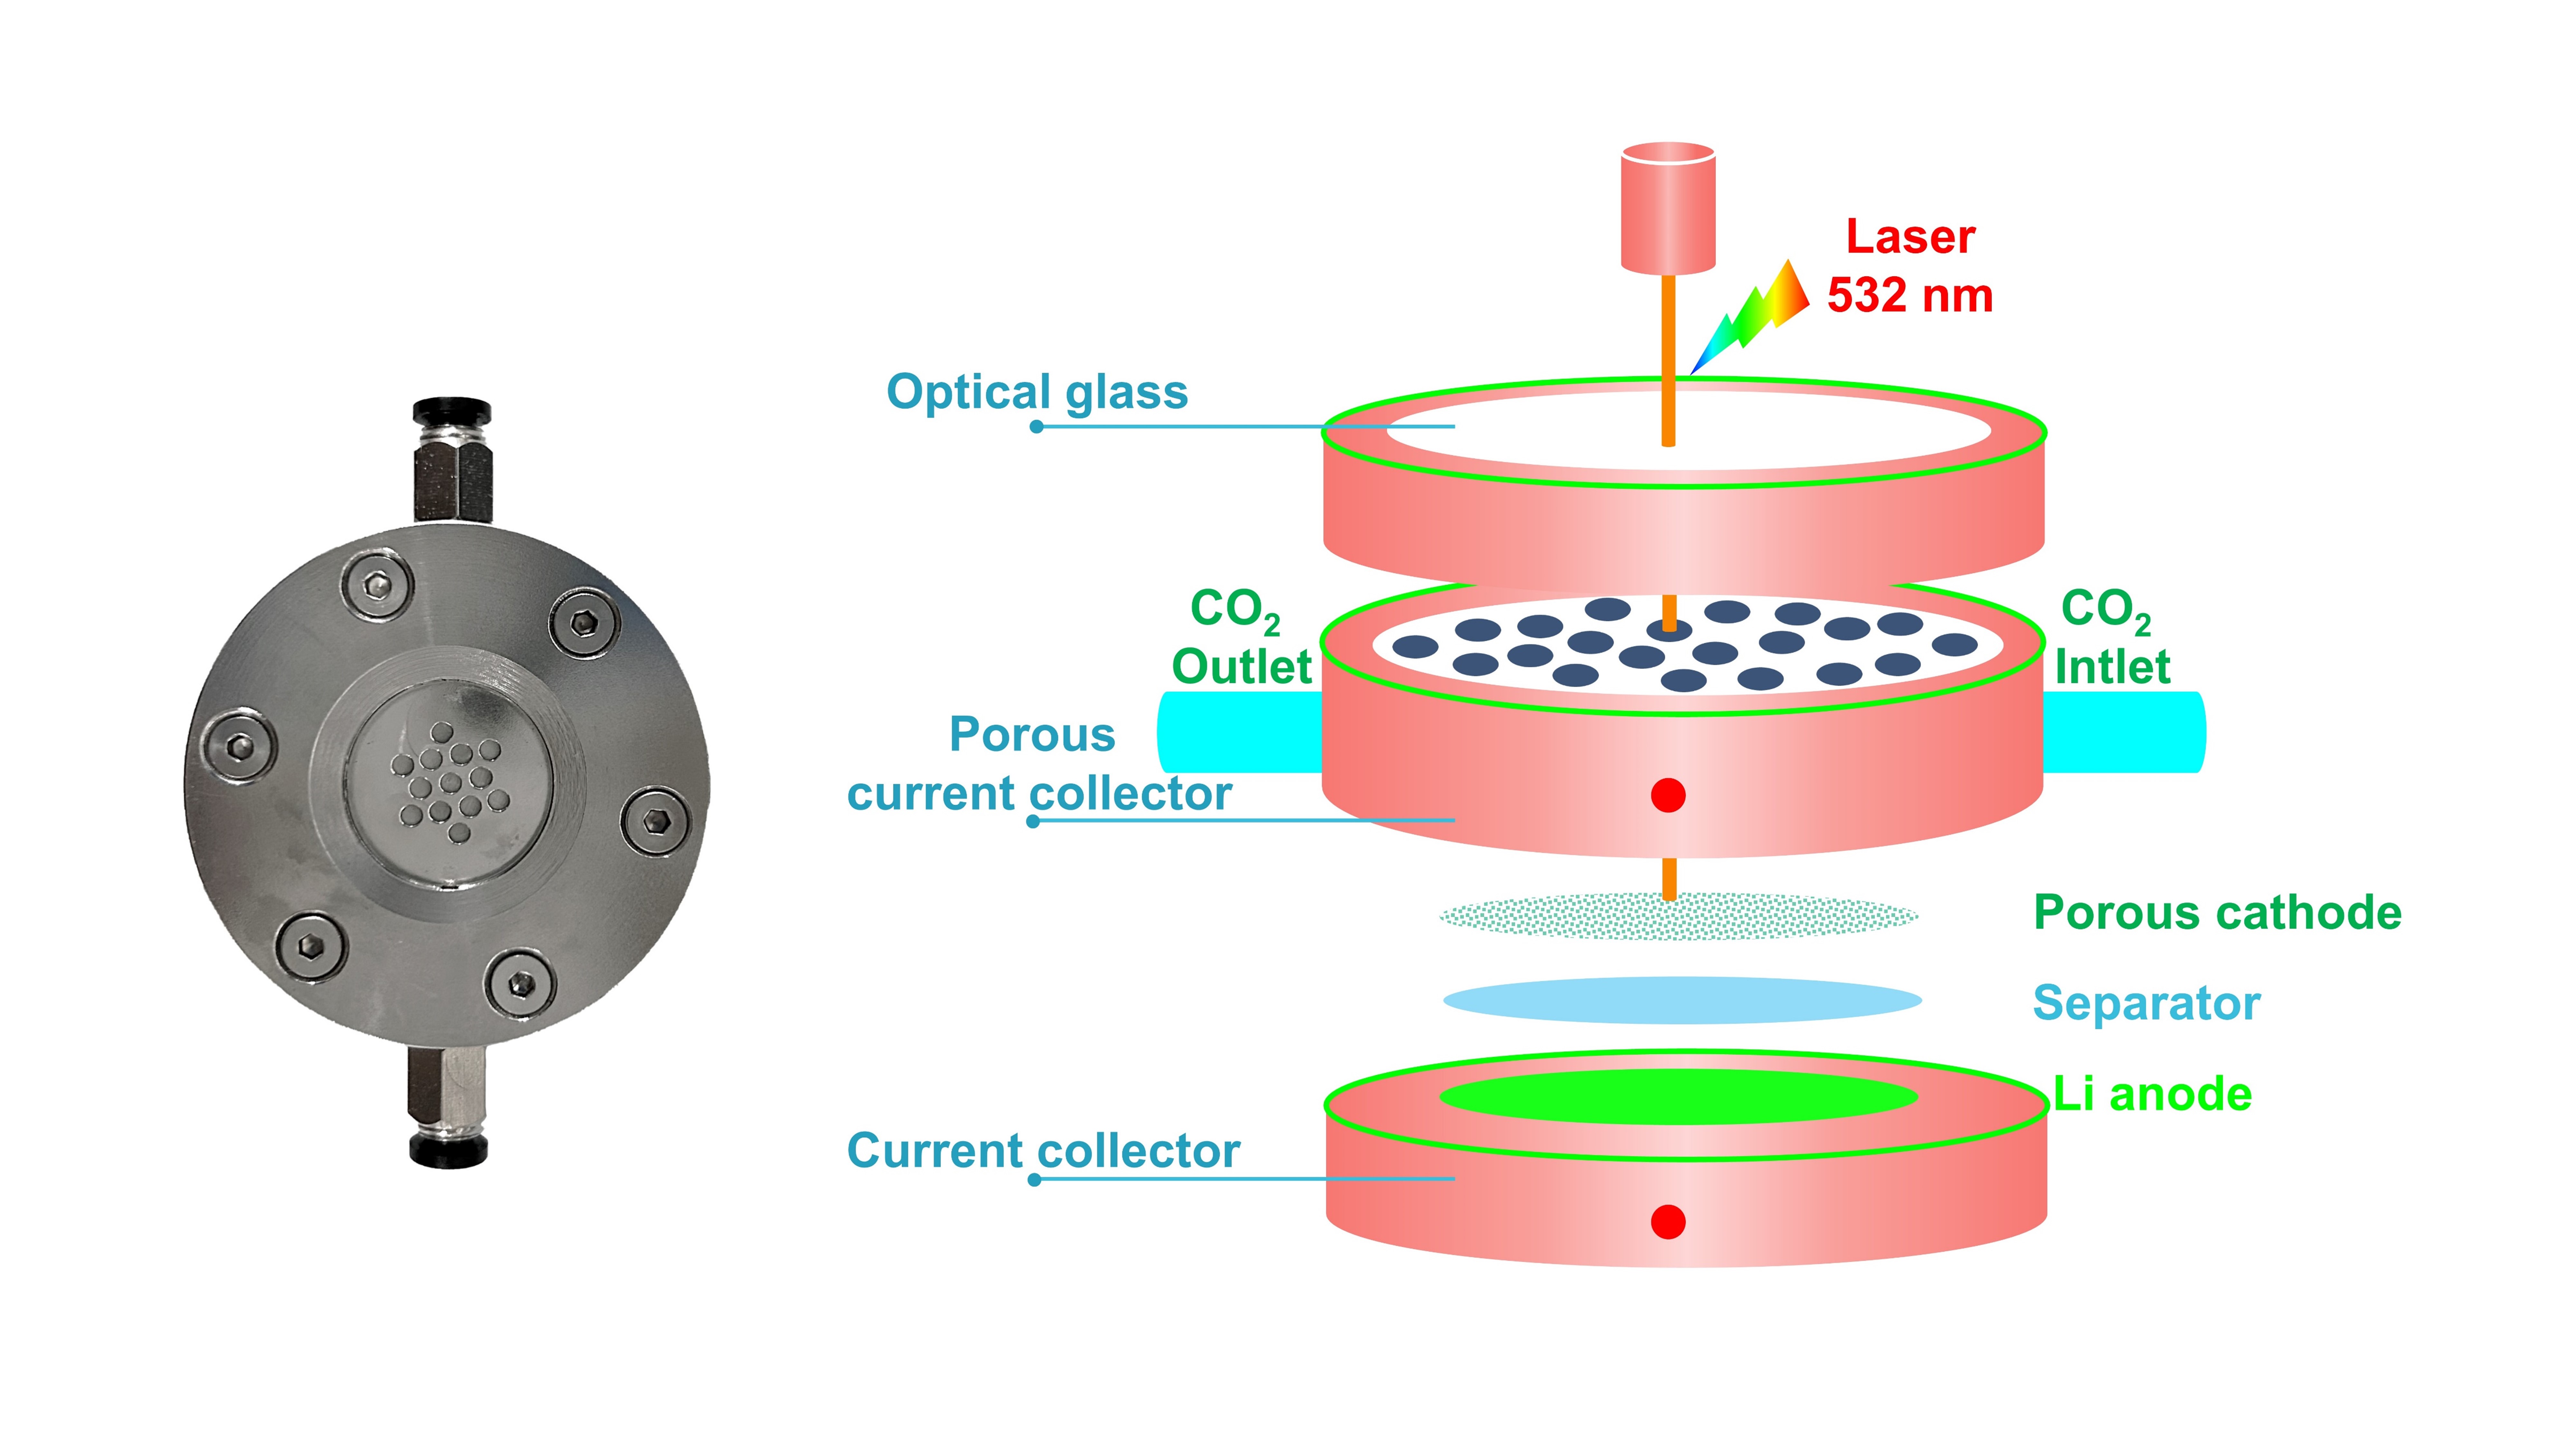


**Figure S21.** The structure of in-situ Li-CO2 Raman battery.


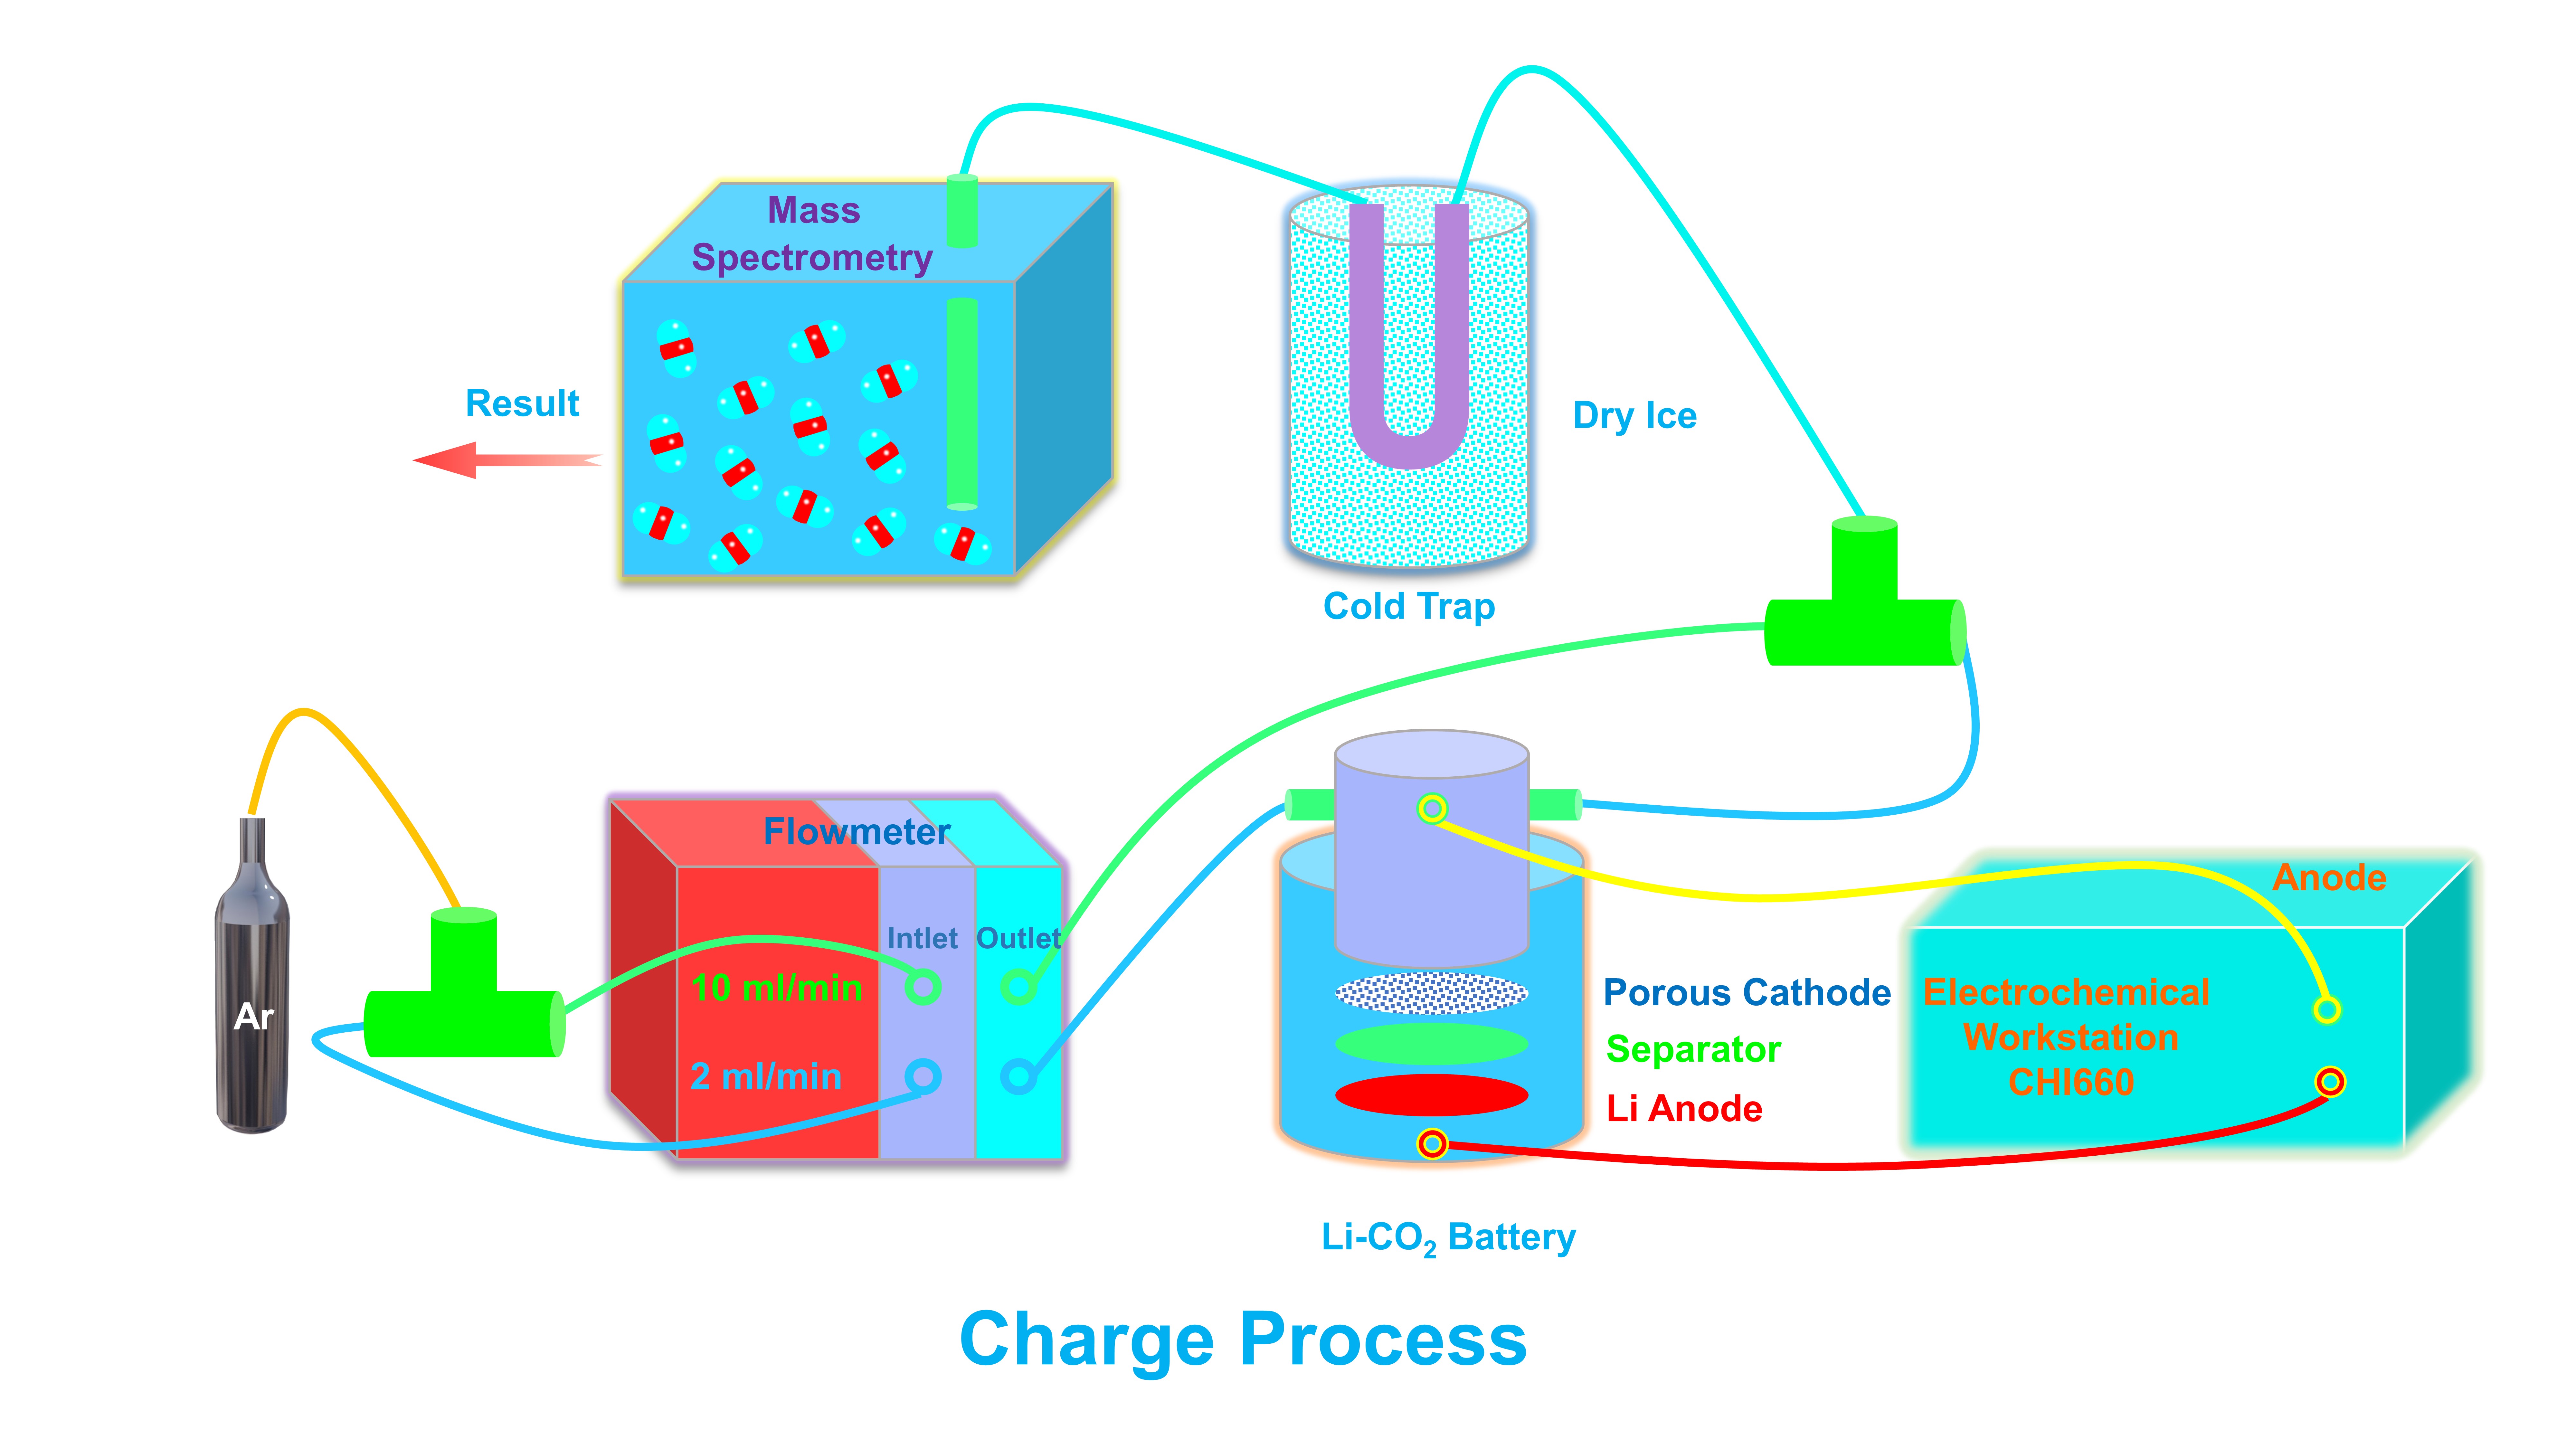


**Figure S22.** Schematic diagram of the in-situ DEMS for the charge process of the Li-CO2 battery.


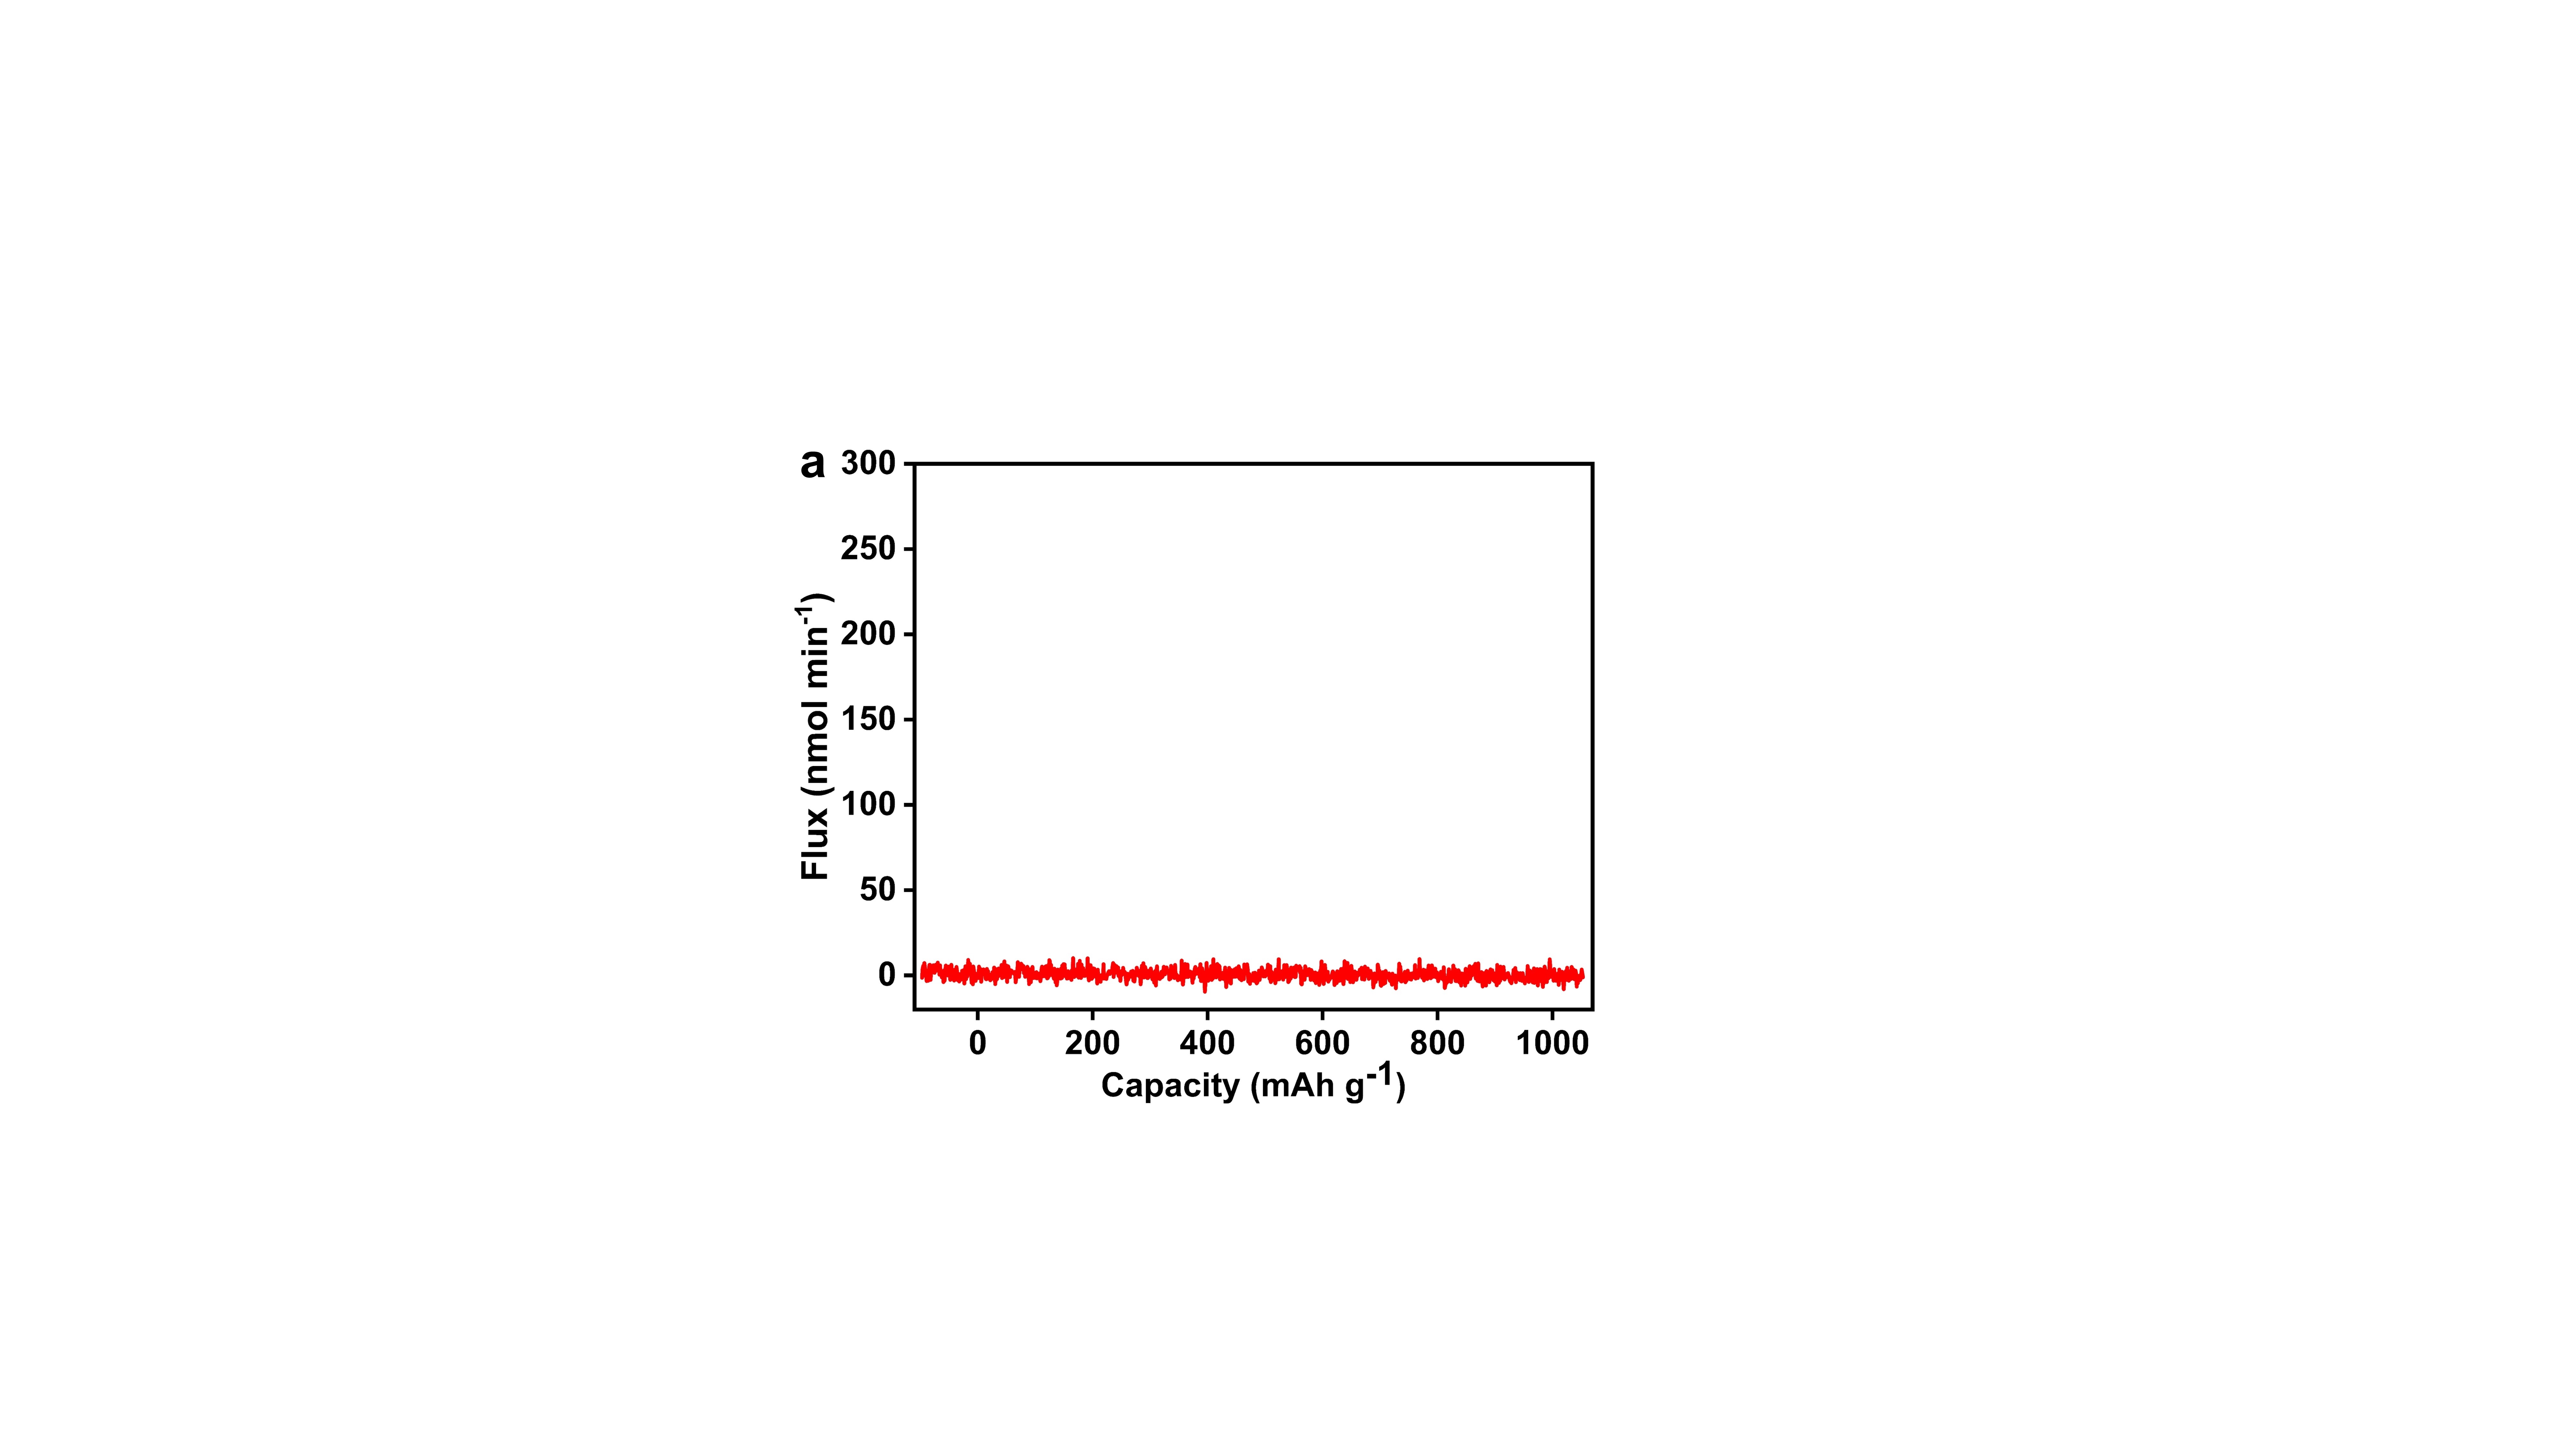


Figure S23. a) In-situ DEMS profiles of Li-CO2 batteries with pFe‖Pc as solid-state redox mediators at 150 μA during charge process of CO.


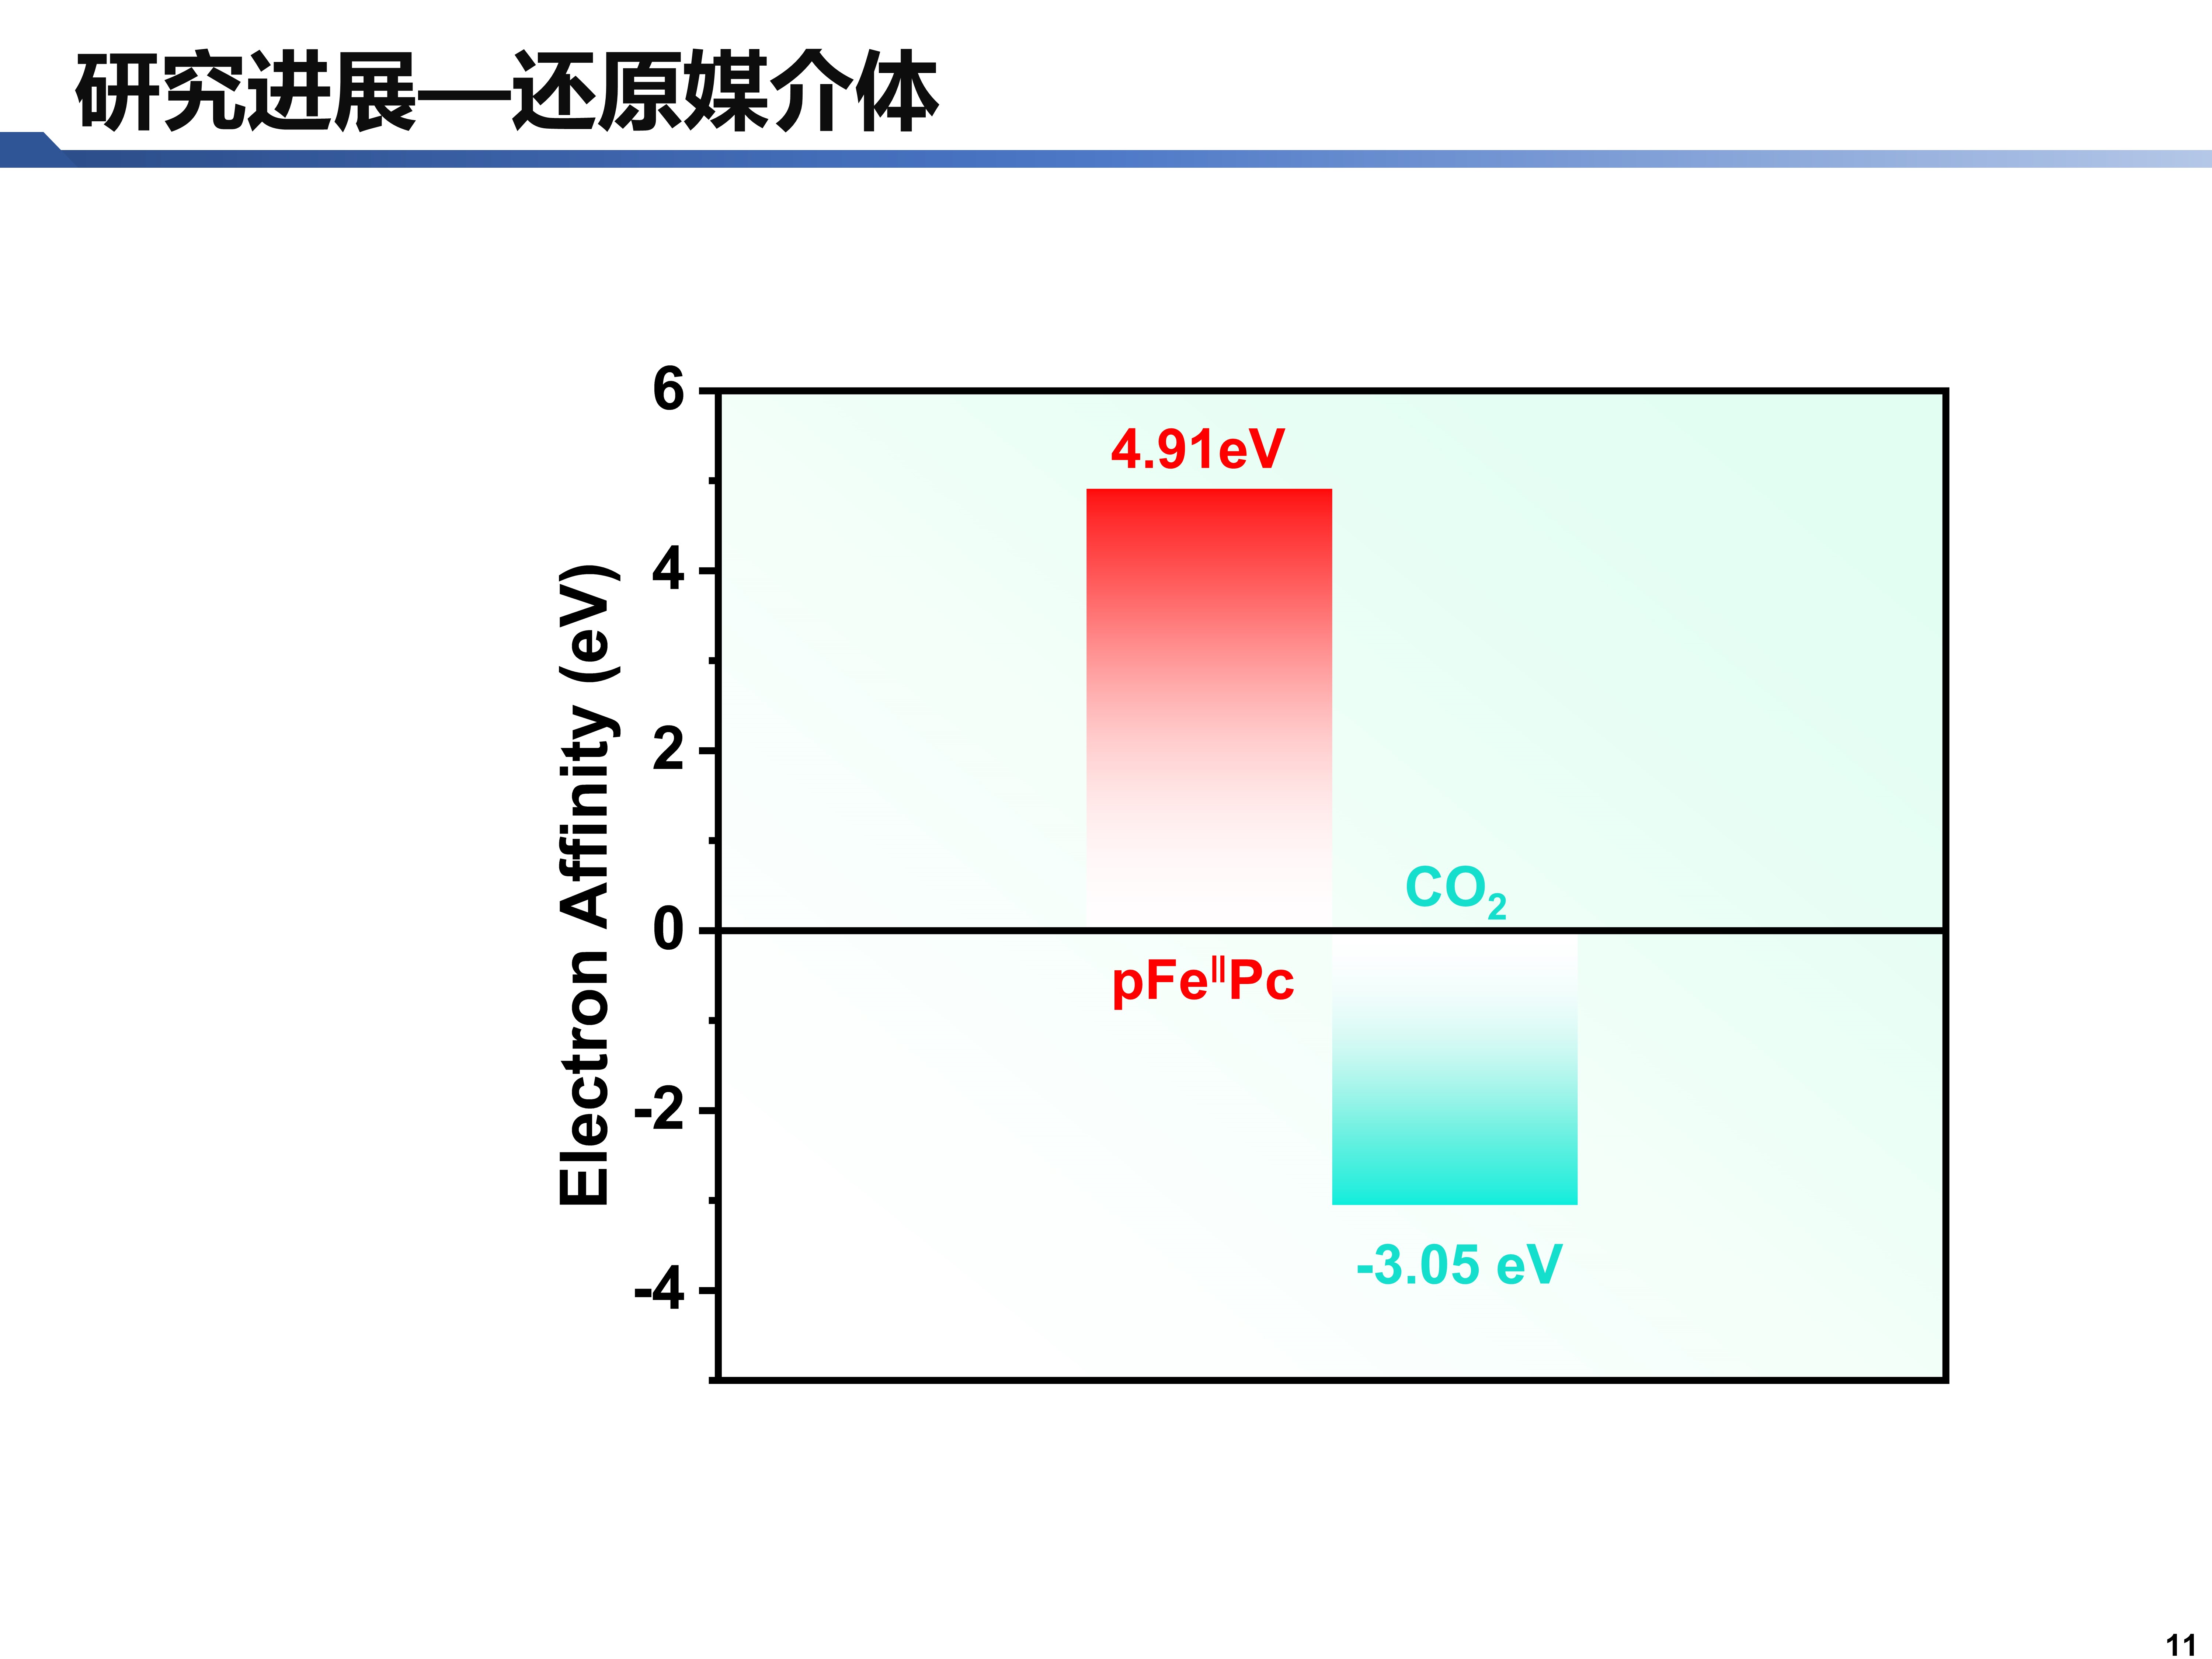


**Figure S24.** A comparison of the electron affinities of CO2 and pFe‖Pc


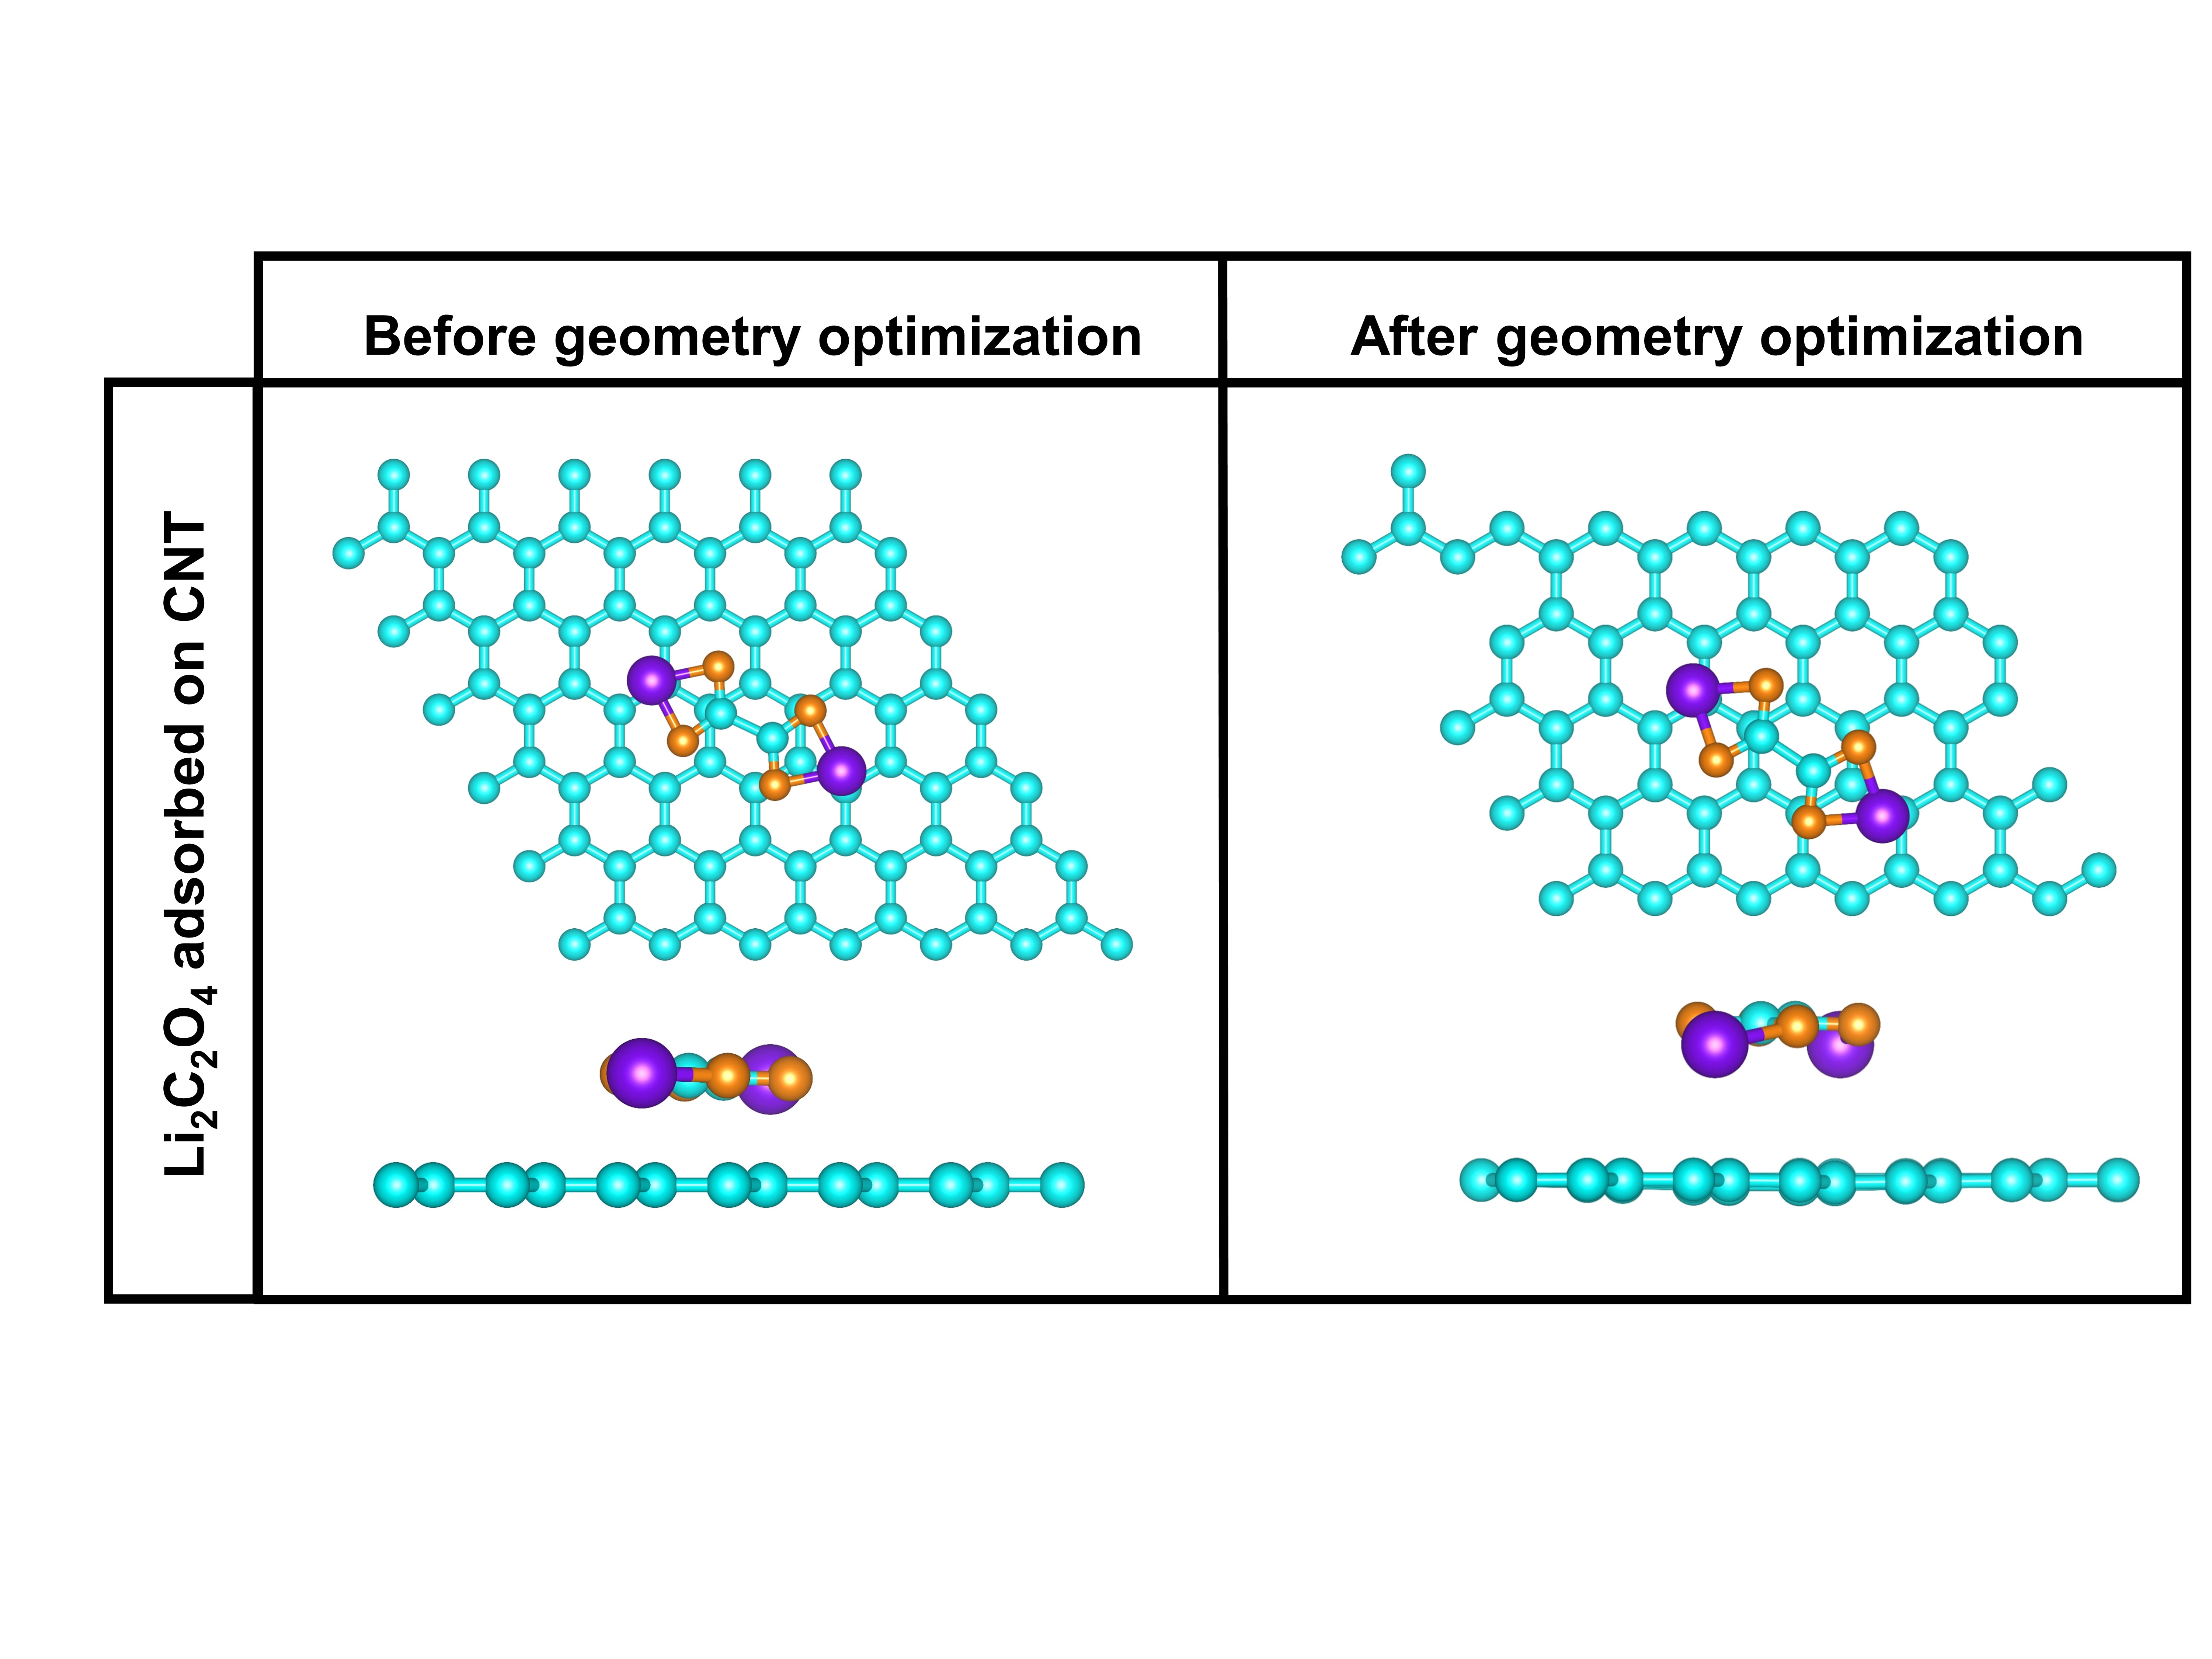


Figure S25. Comparison of the Li2C2O4 adsorption model on the CNT surface before and after optimization.


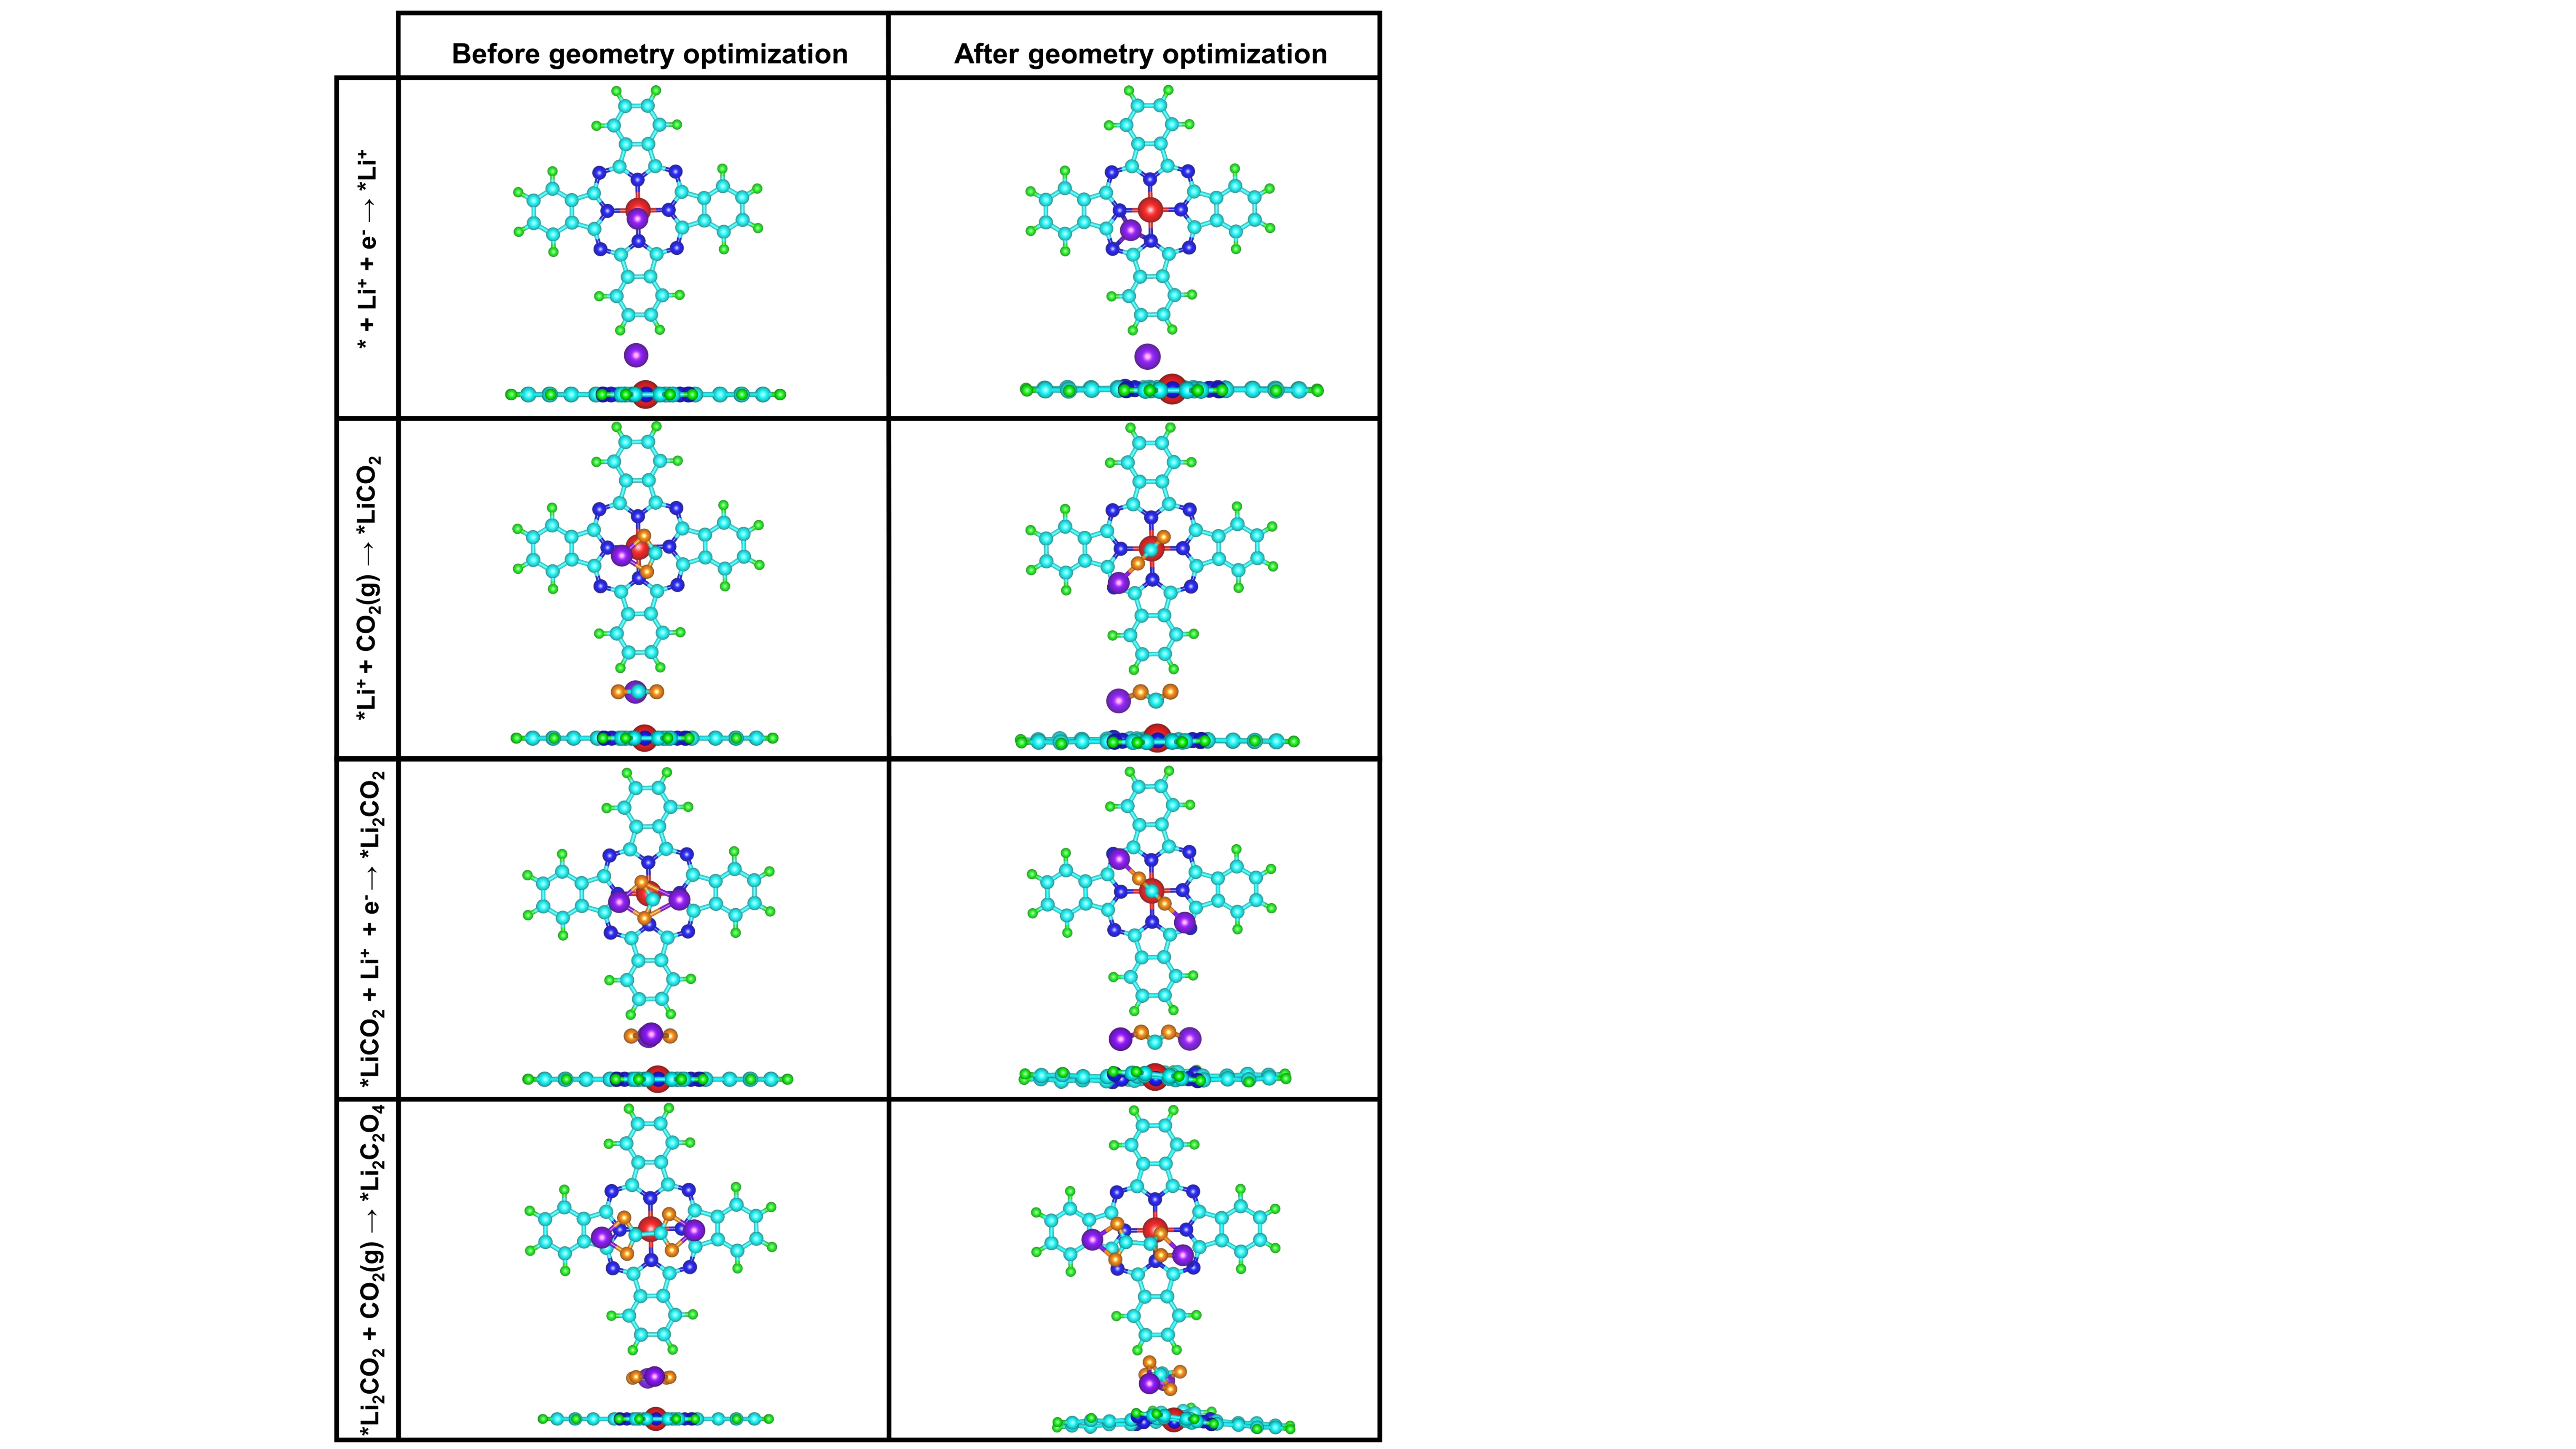


Figure S26. Comparison of ground state structures before and after optimization for each step in Path ǀ.


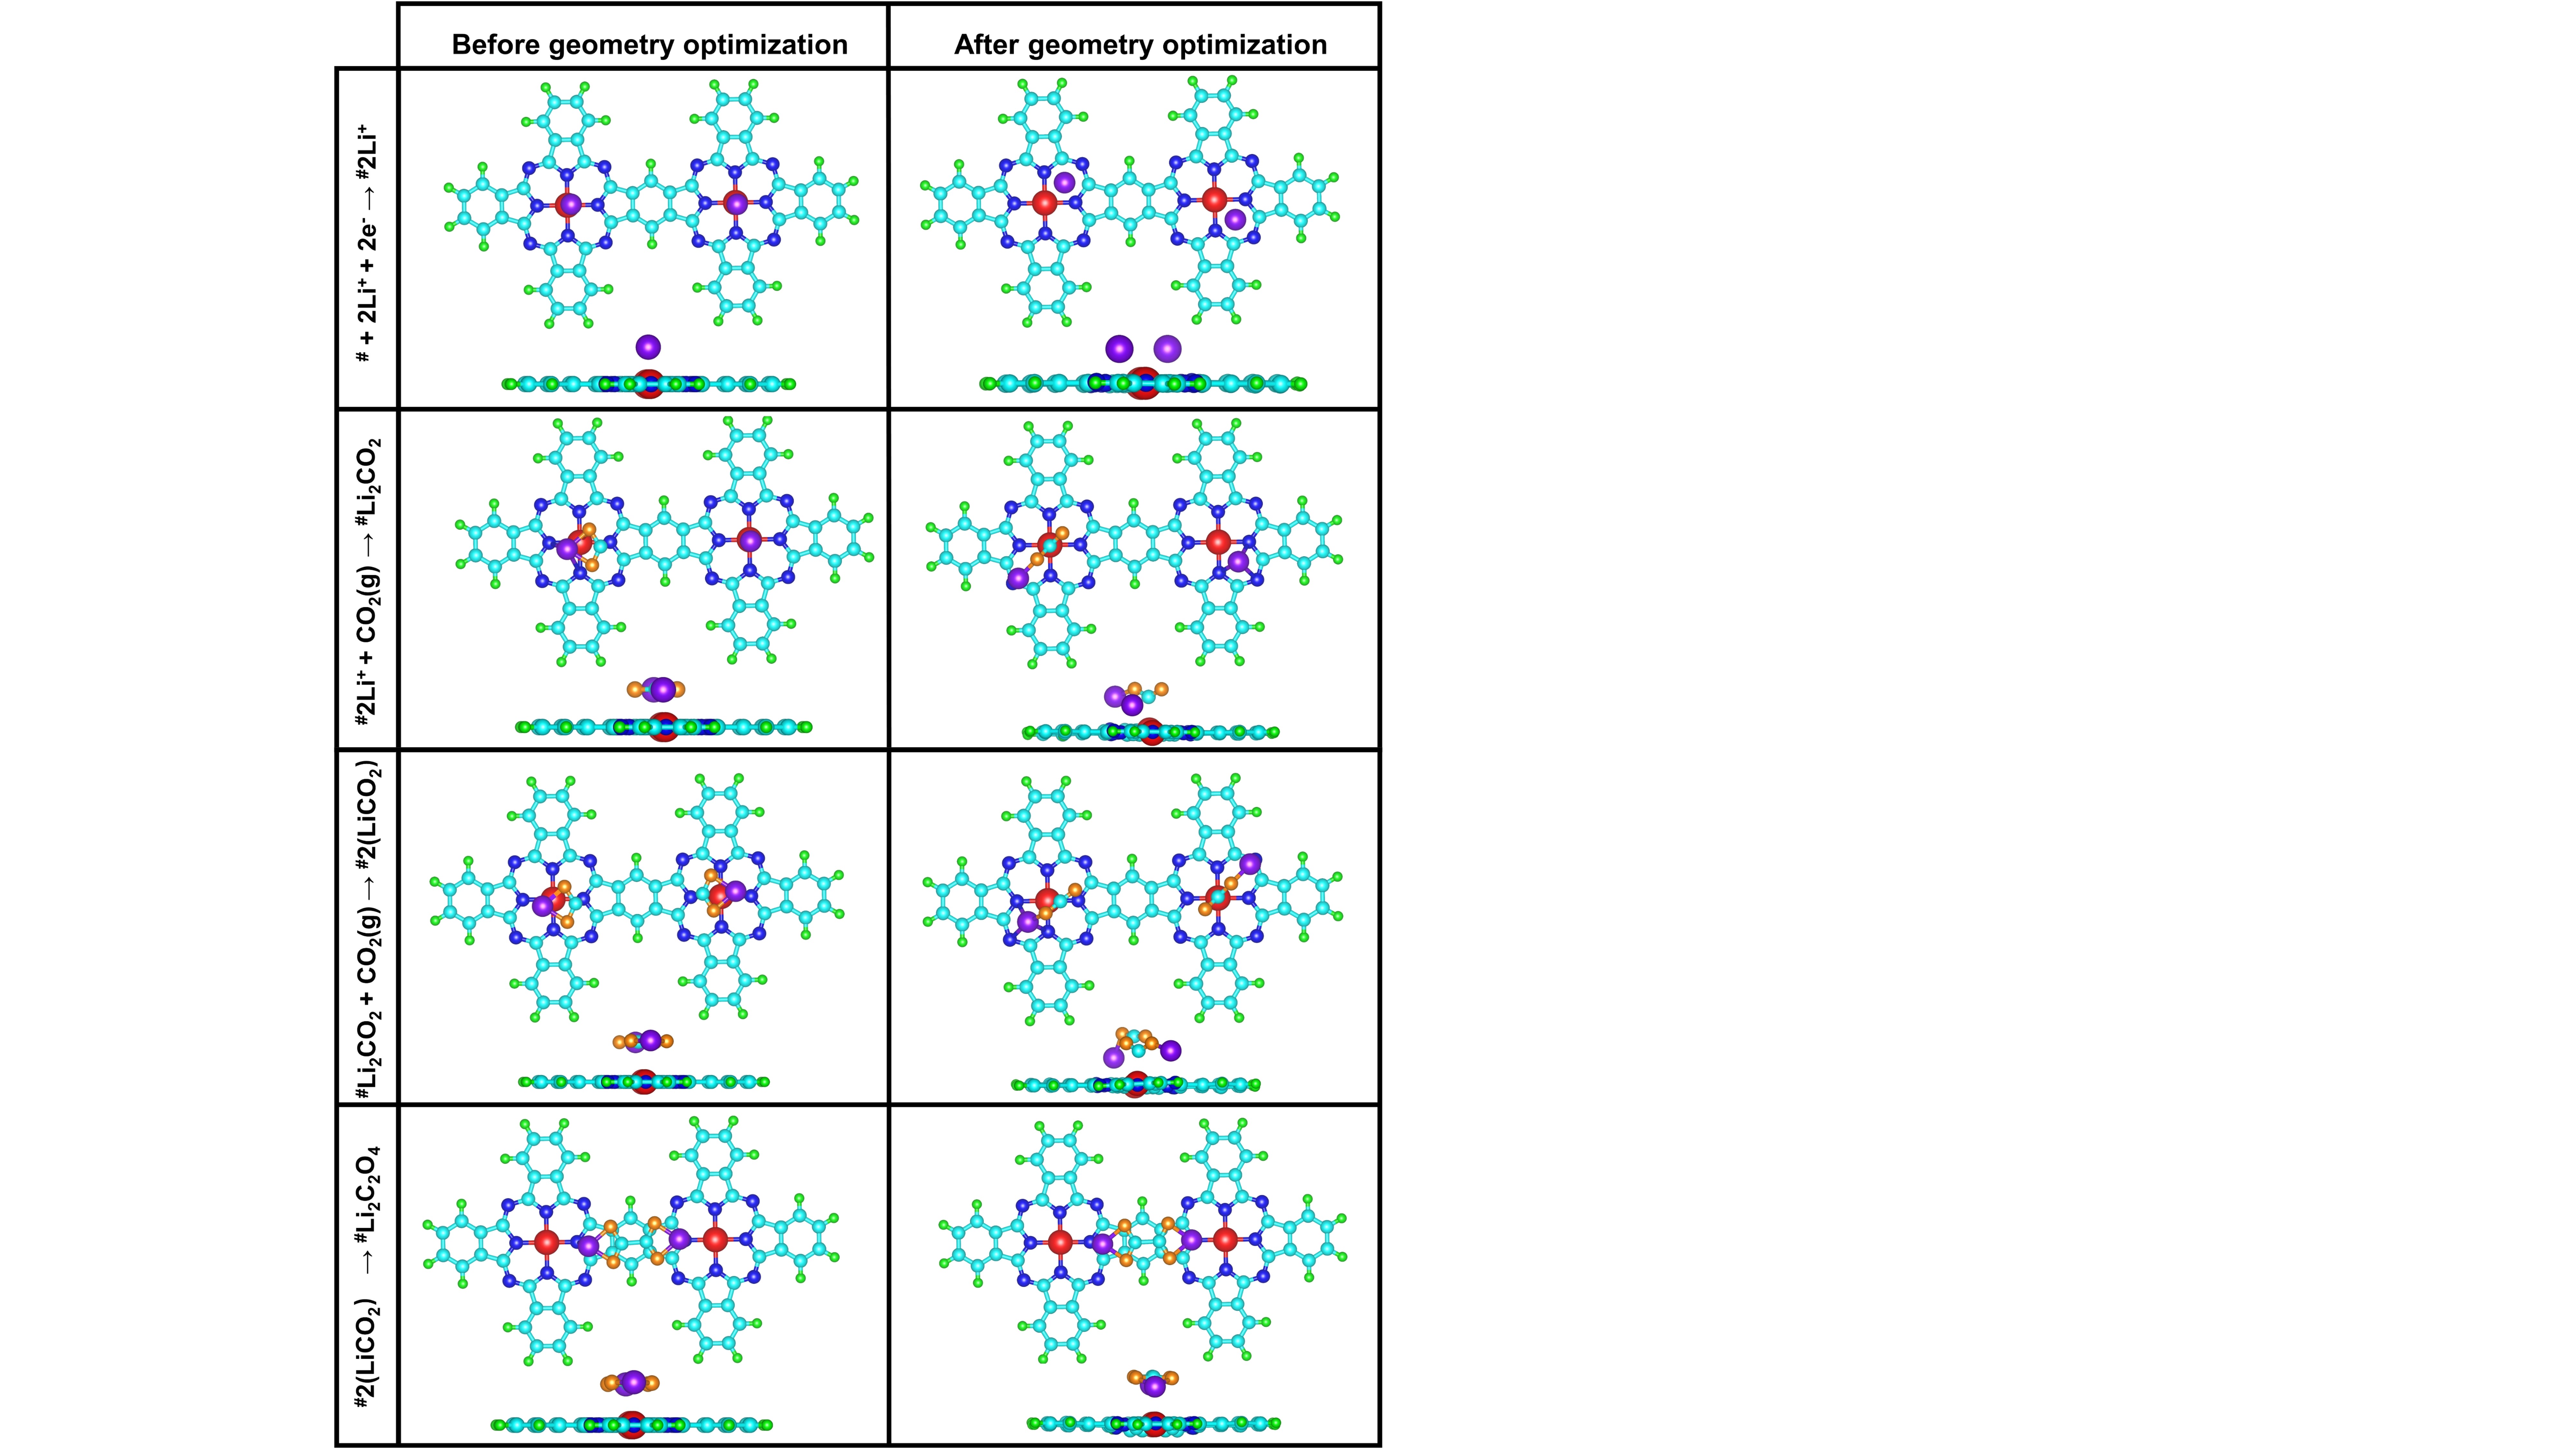


Figure S27. Comparison of ground state structures before and after optimization for each step in Path ‖.


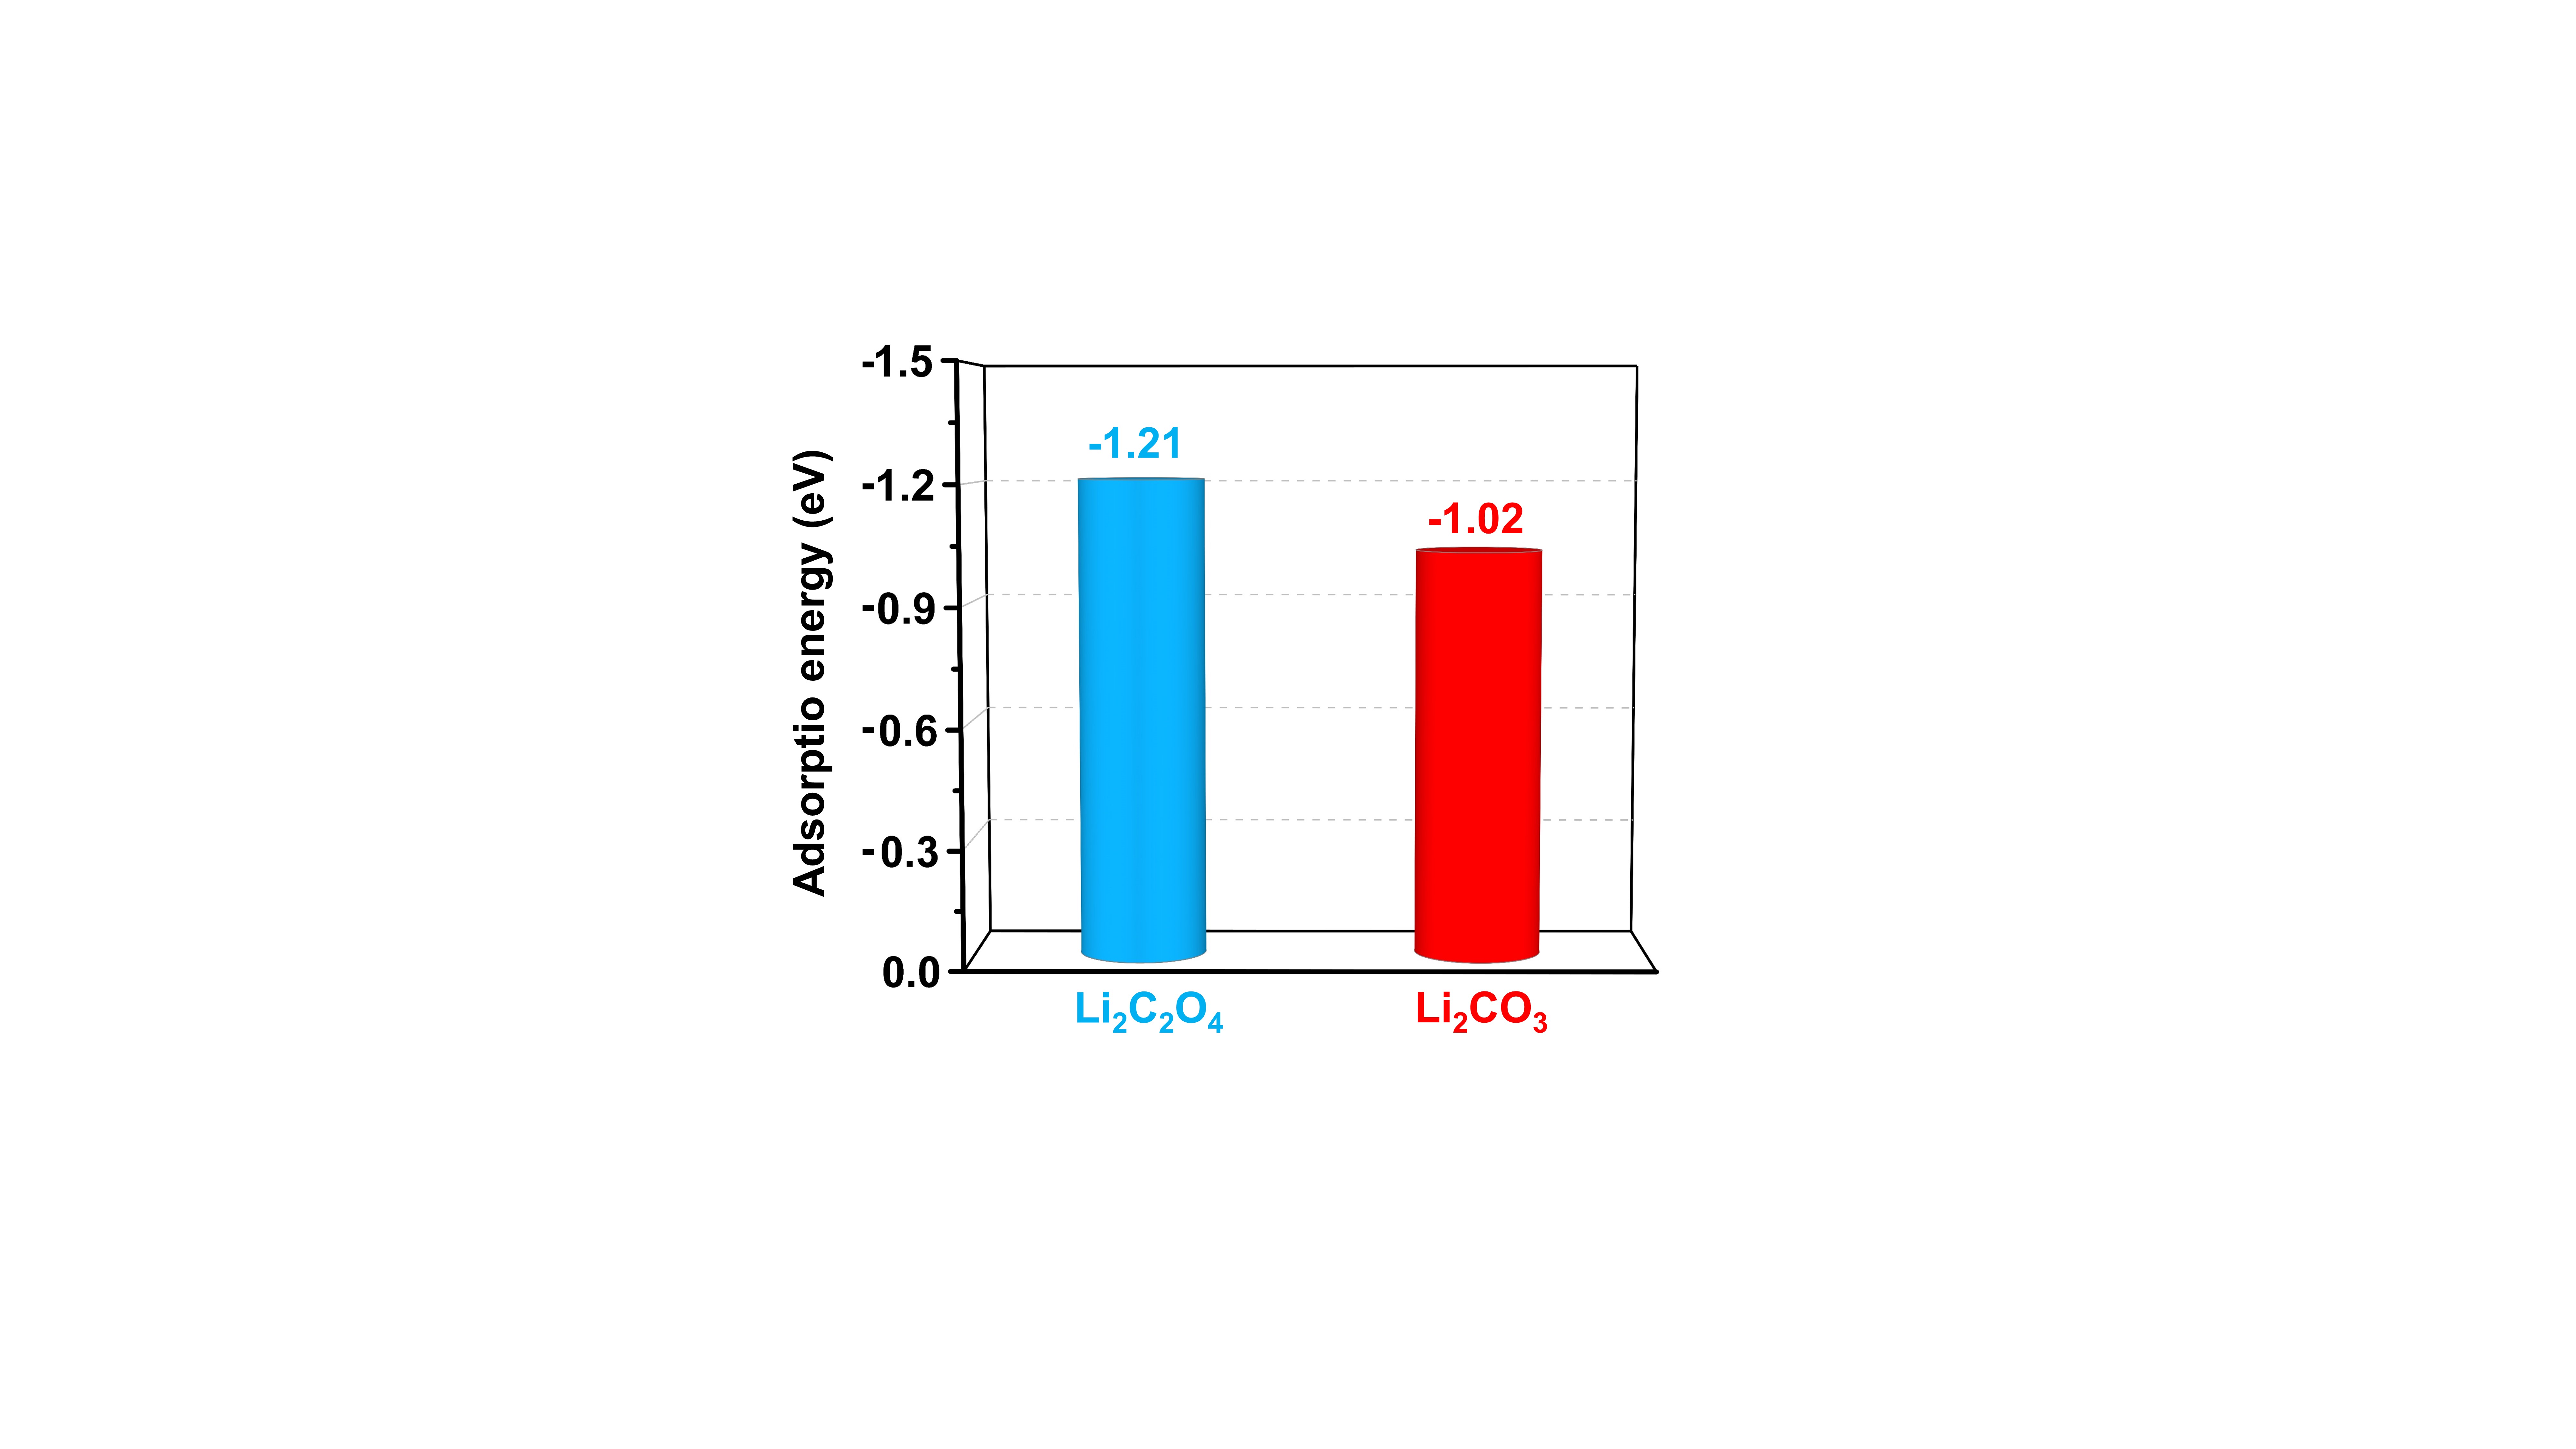


Figure S28. Adsorption energy of Li2C2O4 and Li2CO3 on C32H16N8Fe.


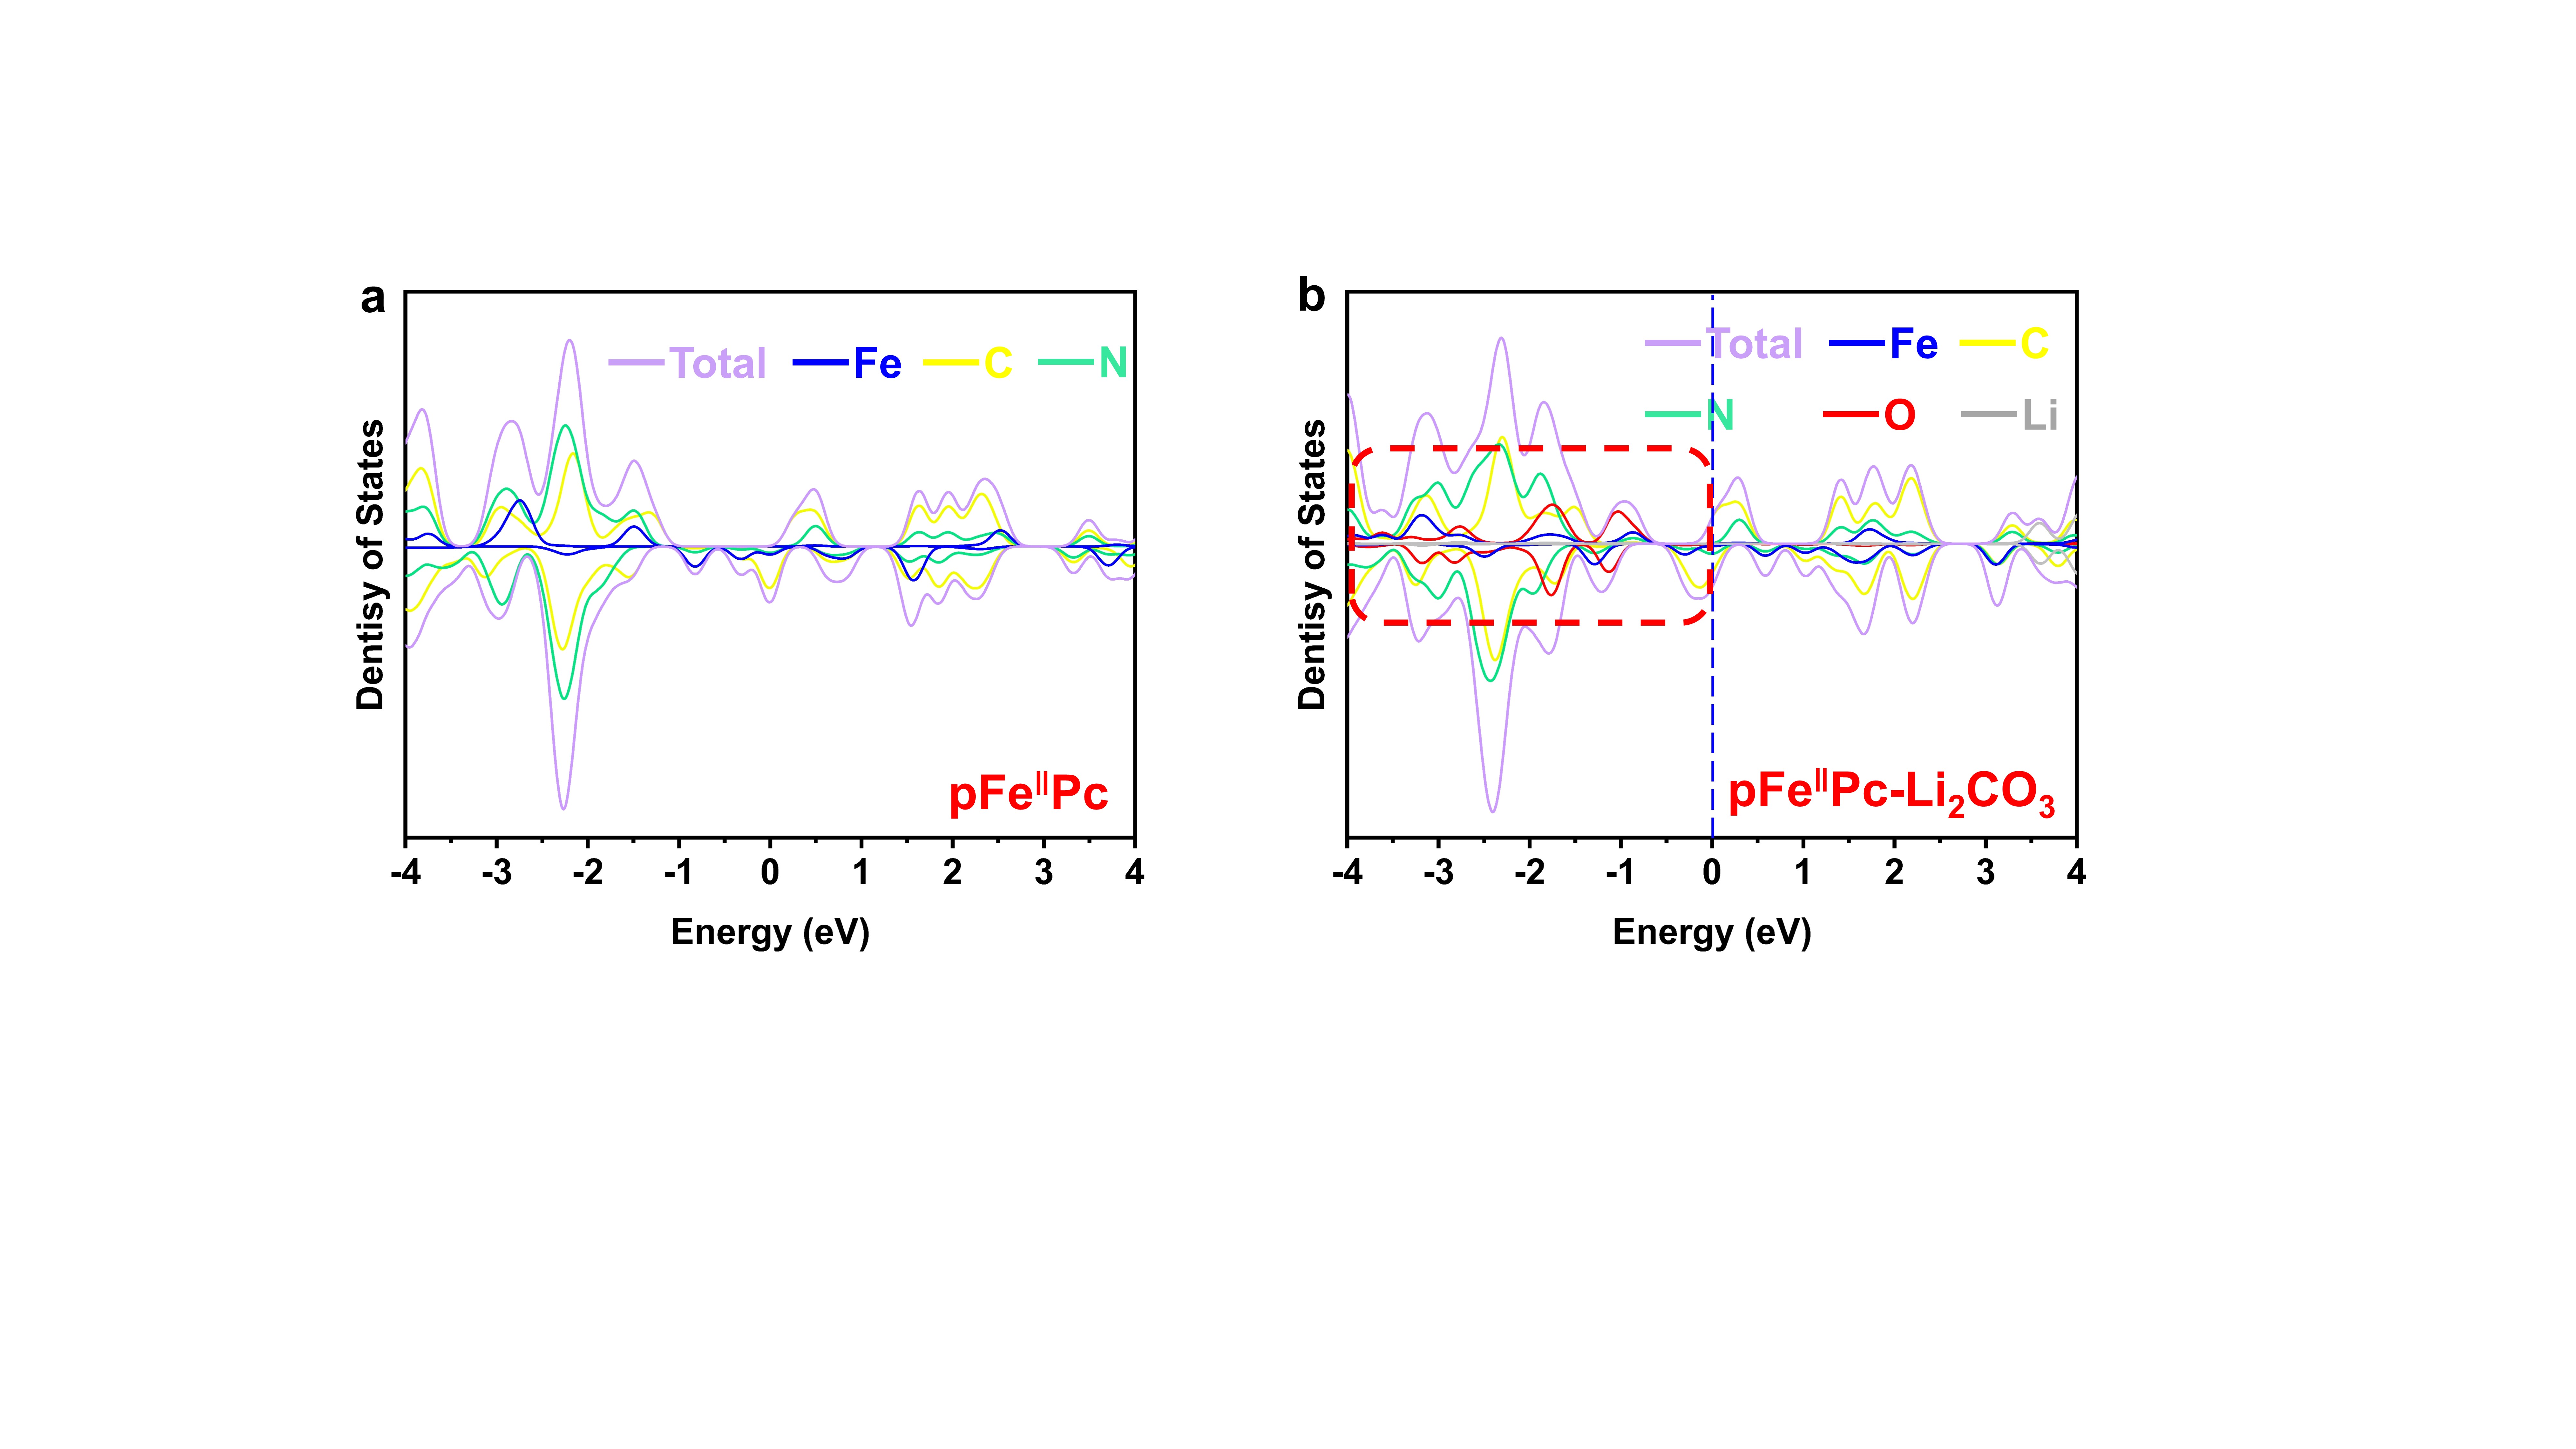


Figure S29. PDOS of C32H16N8Fe around the Fermi level a) C32H16N8Fe and b) C32H16N8Fe after Li2CO3 adsorption.
